# Supplementary material for: Synthesis, 123I-Radiolabeling Optimization, and Initial Preclinical Evaluation of Novel Urea-Based PSMA Inhibitors with a Tributylstannyl Prosthetic Group in Their Structures
Source: MDPI journal article supplement (doi:10.3390/ijms241512206), 2023-07-30
Supplement: s1 [file s1]

# Synthesis, $^{123}\text{I}$ -radiolabeling optimization, and initial preclinical evaluation of novel urea-based PSMA inhibitors with a tributylstannyl prosthetic group in their structures

Lutfi A. Hasnowo<sup>1,2</sup>, Maria S. Larkina<sup>3,4</sup>, Evgenii Plotnikov<sup>3,5</sup>, Vitalina Bodenko<sup>3,4</sup>, Feruza Yuldasheva<sup>3</sup>, Elena Stasyuk<sup>1</sup>, Stanislav A. Petrov<sup>6</sup>, Nikolai Y. Zyk<sup>6</sup>, Aleksei E. Machulkin<sup>6</sup>, Nikolai I. Vorozhtsov<sup>6</sup>, Elena K. Beloglazkina<sup>6,\*</sup>, Valentine G. Nenajdenko<sup>6</sup>, Vladimir Tolmachev<sup>7</sup>, Anna Orlova<sup>8</sup>, Alexander G. Majouga<sup>9</sup>, and Mekhman S. Yusubov<sup>3</sup>

<sup>1</sup> School of Nuclear Science and Engineering, Tomsk Polytechnic University, Tomsk, 634050, Russia

<sup>2</sup> Polytechnic Institute of Nuclear Technology, National Research and Innovation Agency, Yogyakarta, 55281, Indonesia

<sup>3</sup> Research Centrum for Oncotheranostics, Research School of Chemistry and Applied Biomedical Sciences, Tomsk Polytechnic University, Tomsk, 634050, Russia

<sup>4</sup> Department of Pharmaceutical Analysis, Siberian State Medical University, Tomsk, 634050, Russia

<sup>5</sup> Mental Health Research Institute, Tomsk National Research Medical Center, Russian Academy of Sciences, 634014, Tomsk, Russia

<sup>6</sup> Department of Chemistry, M.V. Lomonosov Moscow State University Leninskie Gory, 1-3, 119991 Moscow, Russian Federation

<sup>7</sup> Department of Immunology, Genetics and Pathology, Uppsala University, 75185 Uppsala, Sweden

<sup>8</sup> Department of Medicinal Chemistry, Uppsala University, 751 83 Uppsala, Sweden

<sup>9</sup> Dmitry Mendeleev University of Chemical Technology of Russia, Miusskaya sq. 9, Moscow, 125047, Russian Federation

\* Correspondence: [beloglazki@mail.ru](mailto:beloglazki@mail.ru)

## Supplementary Materials

### Table of contents

|                                                                                               |    |
|-----------------------------------------------------------------------------------------------|----|
| 1. Radio-HPLC chromatograms of [ $^{123}\text{I}$ ]PSMA-p-IB yield .....                      | 4  |
| 2. Radio-iTLC chromatogram of [ $^{123}\text{I}$ ]PSMA-p-IB yield .....                       | 5  |
| 3. Chromatograms of [ $^{123}\text{I}$ ]PSMA-p-IB after purification .....                    | 6  |
| 4. Radio-HPLC chromatogram of [ $^{123}\text{I}$ ]PSMA-p-IB after 3 days storage period ..... | 7  |
| 5. Radio-iTLC and radio-HPLC chromatograms of [ $^{123}\text{I}$ ]PSMA-m-IB .....             | 8  |
| 6. $^1\text{H}$ NMR spectrum of compound № 6 .....                                            | 9  |
| 7. $^{13}\text{C}$ NMR spectrum of compound № 6 .....                                         | 10 |
| 8. ESI-MS of compound № 6 .....                                                               | 11 |
| 9. $^1\text{H}$ NMR spectrum of compound № 9 .....                                            | 12 |
| 10. $^{13}\text{C}$ NMR spectrum of compound № 9 .....                                        | 13 |
| 11. ESI-MS of compound № 9 .....                                                              | 14 |

|                                                         |    |
|---------------------------------------------------------|----|
| 12. HRMS (m/z, ESI) of compound № 9 .....               | 15 |
| 13. <sup>1</sup> H NMR spectrum of compound № 10 .....  | 16 |
| 14. <sup>13</sup> C NMR spectrum of compound № 10 ..... | 17 |
| 15. ESI-MS of compound № 10 .....                       | 18 |
| 16. HRMS (m/z, ESI) of compound № 10 .....              | 19 |
| 17. <sup>1</sup> H NMR spectrum of compound № 11 .....  | 20 |
| 18. <sup>13</sup> C NMR spectrum of compound № 11 ..... | 21 |
| 19. ESI-MS of compound № 11 .....                       | 22 |
| 20. HRMS (m/z, ESI) of compound № 11 .....              | 23 |
| 21. <sup>1</sup> H NMR spectrum of compound № 13 .....  | 24 |
| 22. <sup>13</sup> C NMR spectrum of compound № 13 ..... | 25 |
| 23. ESI-MS of compound № 13 .....                       | 26 |
| 24. HRMS (m/z, ESI) of compound № 13 .....              | 27 |
| 25. <sup>1</sup> H NMR spectrum of compound № 14 .....  | 28 |
| 26. <sup>13</sup> C NMR spectrum of compound № 14 ..... | 29 |
| 27. <sup>1</sup> H NMR spectrum of compound № 16 .....  | 30 |
| 28. <sup>13</sup> C NMR spectrum of compound № 16 ..... | 31 |
| 29. HRMS (m/z, ESI) of compound № 16 .....              | 32 |
| 30. <sup>1</sup> H NMR spectrum of compound № 17 .....  | 33 |
| 31. <sup>13</sup> C NMR spectrum of compound № 17 ..... | 34 |
| 32. <sup>1</sup> H NMR spectrum of compound № 18 .....  | 35 |
| 33. <sup>13</sup> C NMR spectrum of compound № 18 ..... | 36 |
| 34. ESI-MS of compound № 18 .....                       | 37 |
| 35. HRMS (m/z, ESI) of compound № 18 .....              | 38 |
| 36. <sup>1</sup> H NMR spectrum of compound № 19 .....  | 39 |
| 37. <sup>13</sup> C NMR spectrum of compound № 19 ..... | 40 |
| 38. HRMS (m/z, ESI) of compound № 19 .....              | 41 |
| 39. <sup>1</sup> H NMR spectrum of compound № 20 .....  | 42 |
| 40. <sup>13</sup> C NMR spectrum of compound № 20 ..... | 43 |

|                                                         |    |
|---------------------------------------------------------|----|
| 41. HRMS (m/z, ESI) of compound № 20 .....              | 44 |
| 42. <sup>1</sup> H NMR spectrum of compound № 21 .....  | 45 |
| 43. <sup>13</sup> C NMR spectrum of compound № 21 ..... | 46 |
| 44. ESI-MS of compound № 21 .....                       | 47 |
| 45. HRMS (m/z, ESI) of compound № 21 .....              | 48 |
| 46. <sup>1</sup> H NMR spectrum of compound № 22 .....  | 49 |
| 47. <sup>13</sup> C NMR spectrum of compound № 22 ..... | 50 |
| 48. ESI-MS of compound № 22 .....                       | 51 |
| 49. HRMS (m/z, ESI) of compound № 22 .....              | 52 |

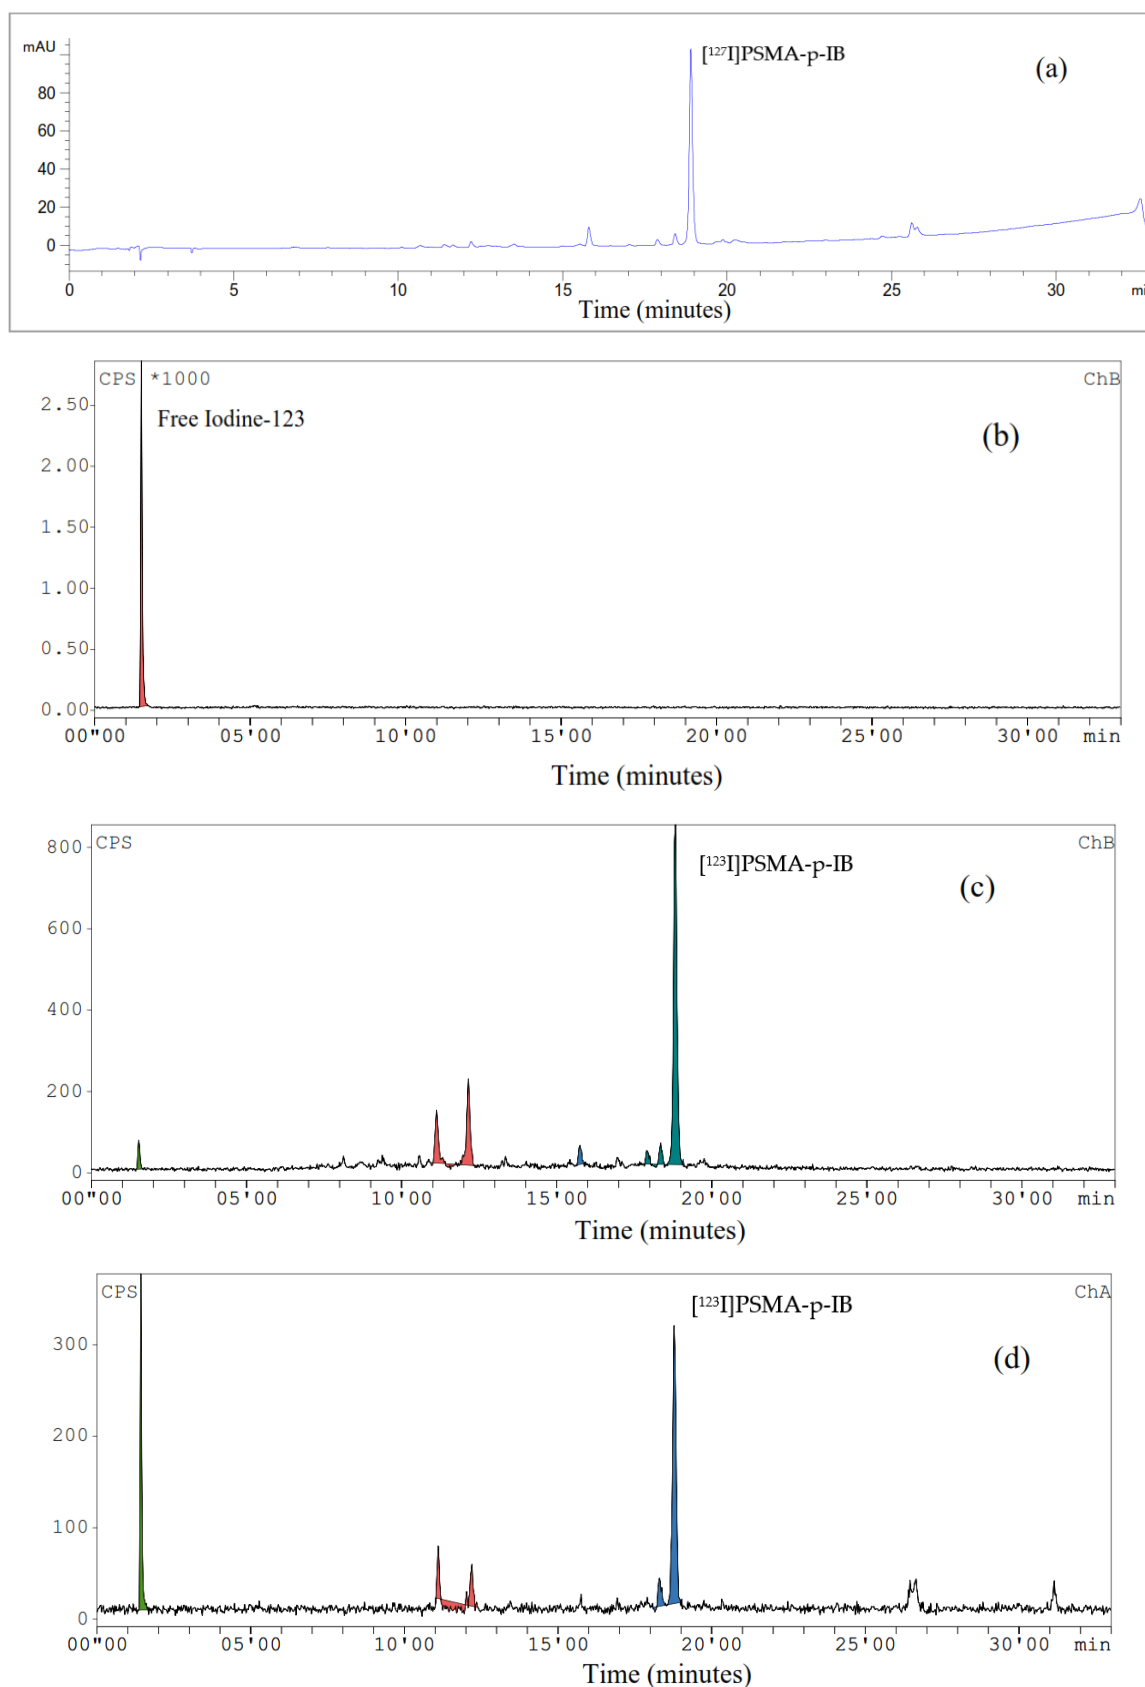

**Figure S1.** Radio-HPLC chromatograms of (a)  $[^{127}\text{I}]\text{PSMA-p-IB}$  reference sample, (b) blank solution, (c) radiolabeling yield with  $[^{123}\text{I}]\text{PSMA-p-IB}$  yield of 69.99%, and (d) radiolabeling yield with  $[^{123}\text{I}]\text{PSMA-p-IB}$  yield of 65.73%.

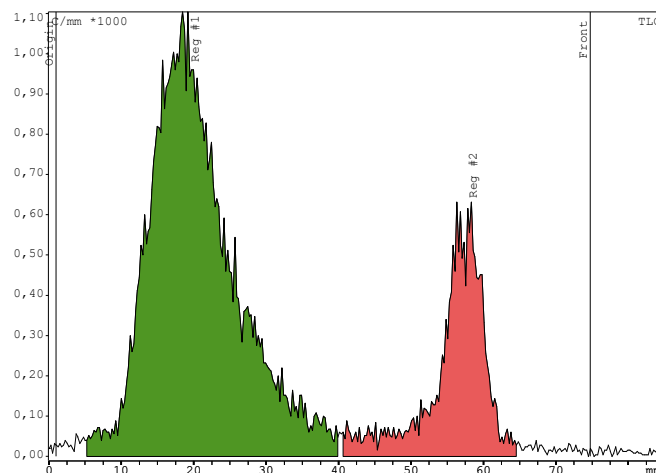

**Figure S2.** Radio-iTLC chromatogram of [ $^{123}\text{I}$ ]PSMA-p-IB based on the results of radiolabeling optimization (the left peak: [ $^{123}\text{I}$ ]PSMA-p-IB, the right peak: free Iodine-123). The chromatography was performed using iTLC-SG glass fiber sheet with a developing solution of  $\text{CH}_3\text{CN}/\text{H}_2\text{O}$ , 95/5 (v/v).

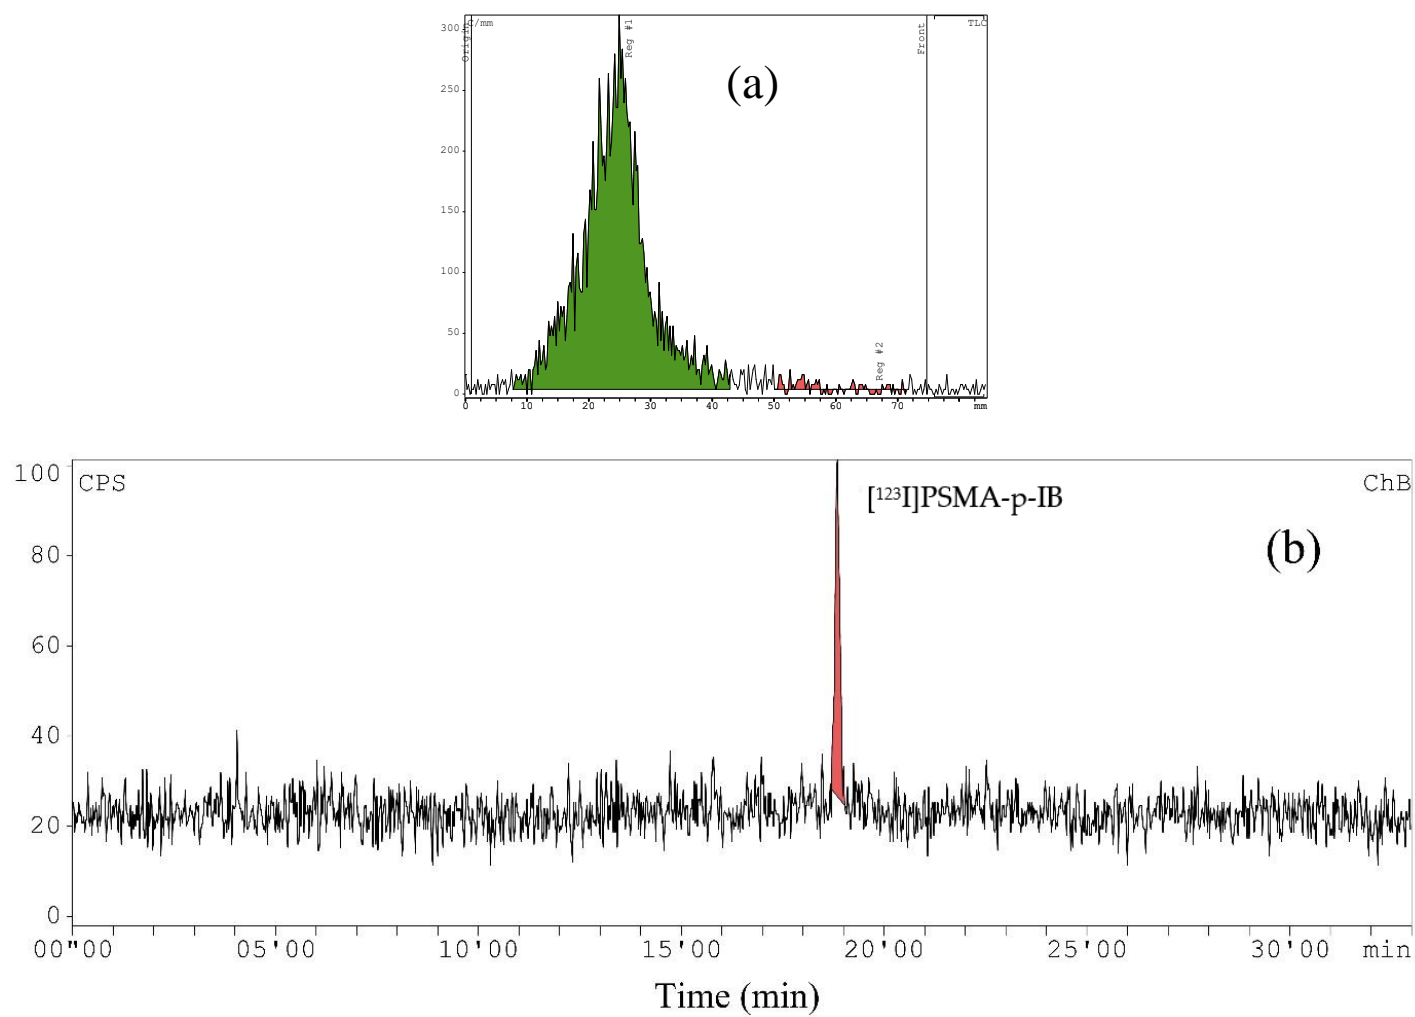

**Figure S3.** Chromatograms of  $[^{123}\text{I}]\text{PSMA-p-IB}$  after purification analyzed by (a) Radio-TLC-SG 60 F254 and (b) Radio-HPLC

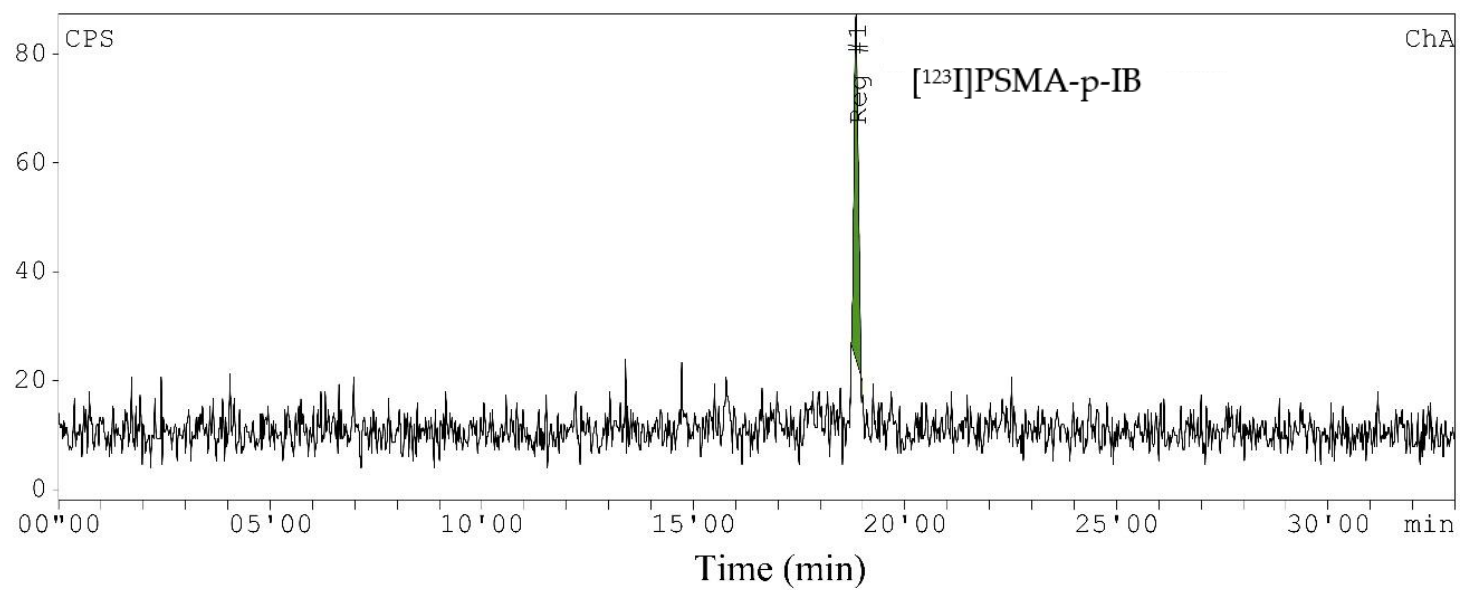

**Figure S4.** Radio-HPLC chromatogram of [ $^{123}\text{I}$ ]PSMA-p-IB after 3 days storage period

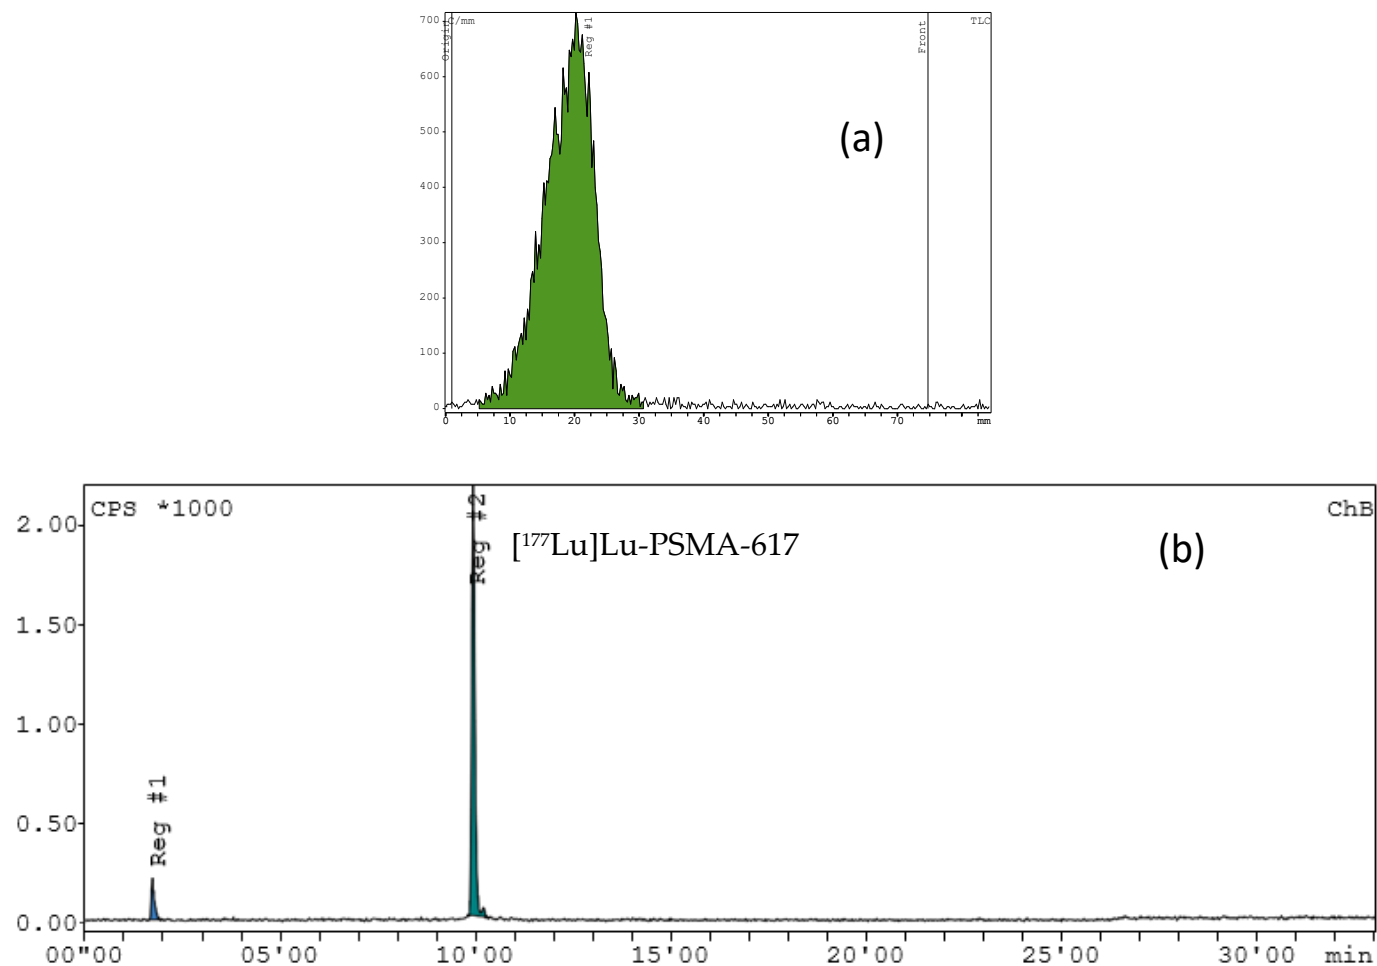

**Figure S5.** Chromatograms of  $[^{177}\text{Lu}]\text{Lu-PSMA-617}$  by (a) Radio-iTLC and (b) Radio-HPLC



# Compound 6

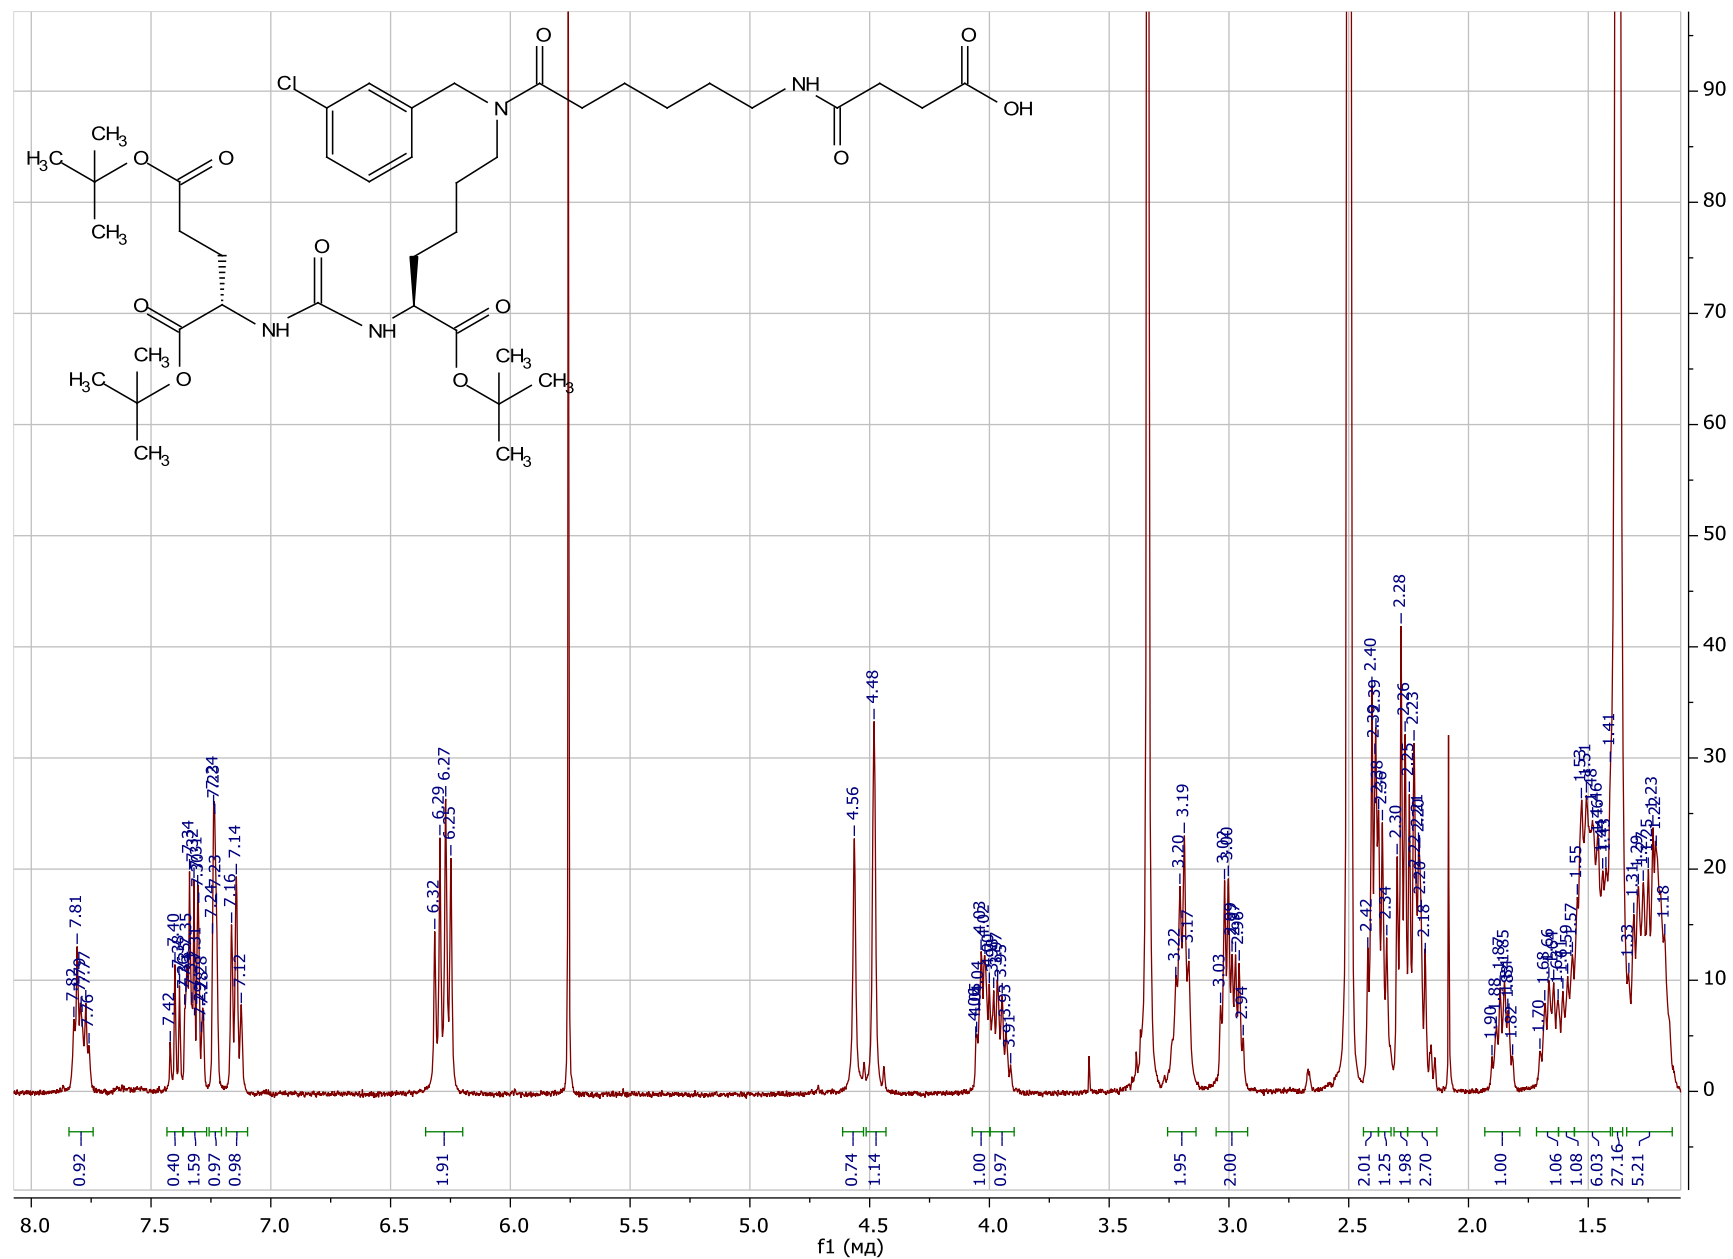

Figure S6. <sup>1</sup>H NMR spectrum of compound N<sup>o</sup> 6 in DMSO-*d*<sub>6</sub>.

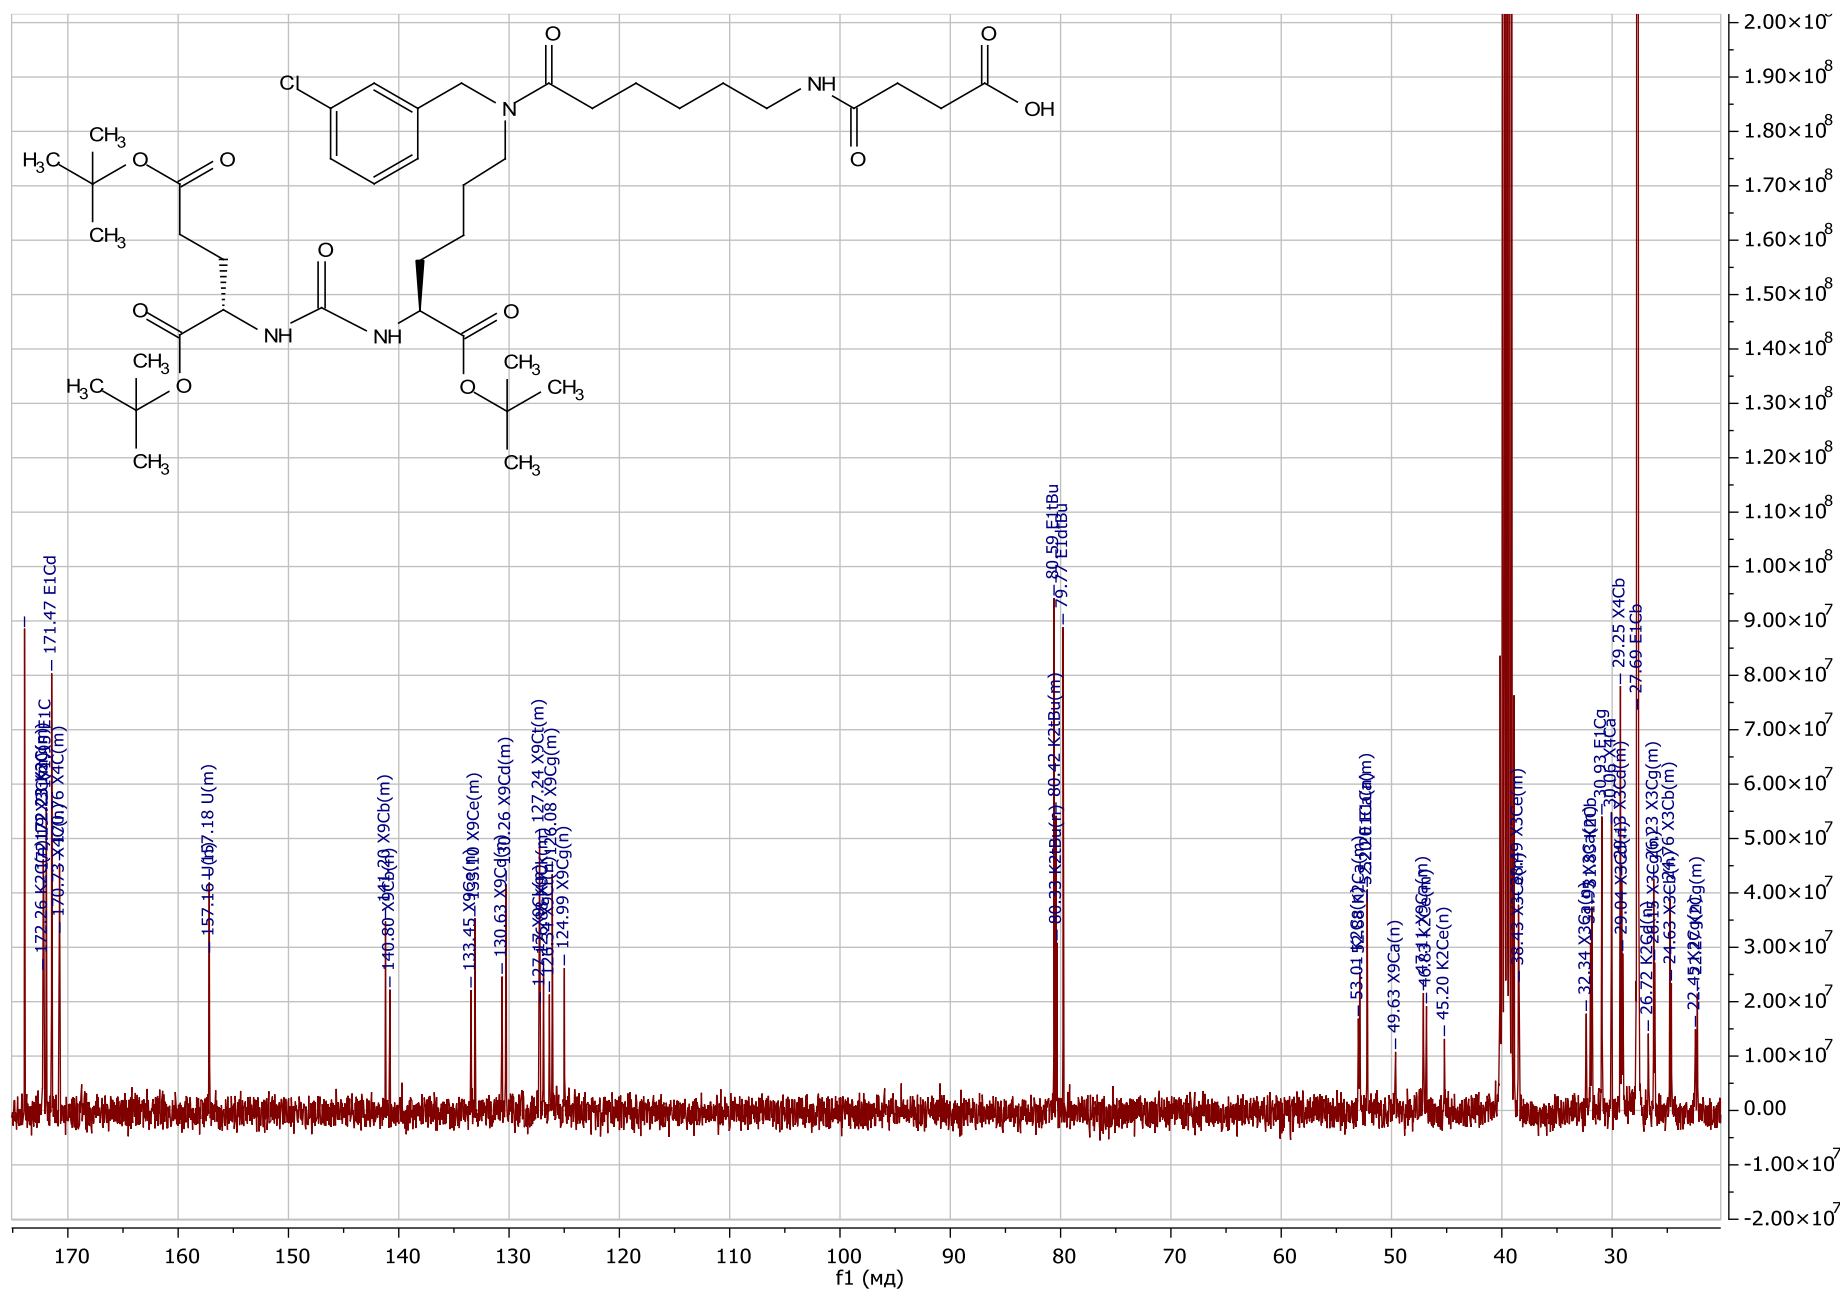

Figure S7. <sup>13</sup>C NMR spectrum of compound № 6 in DMSO-*d*<sub>6</sub>.

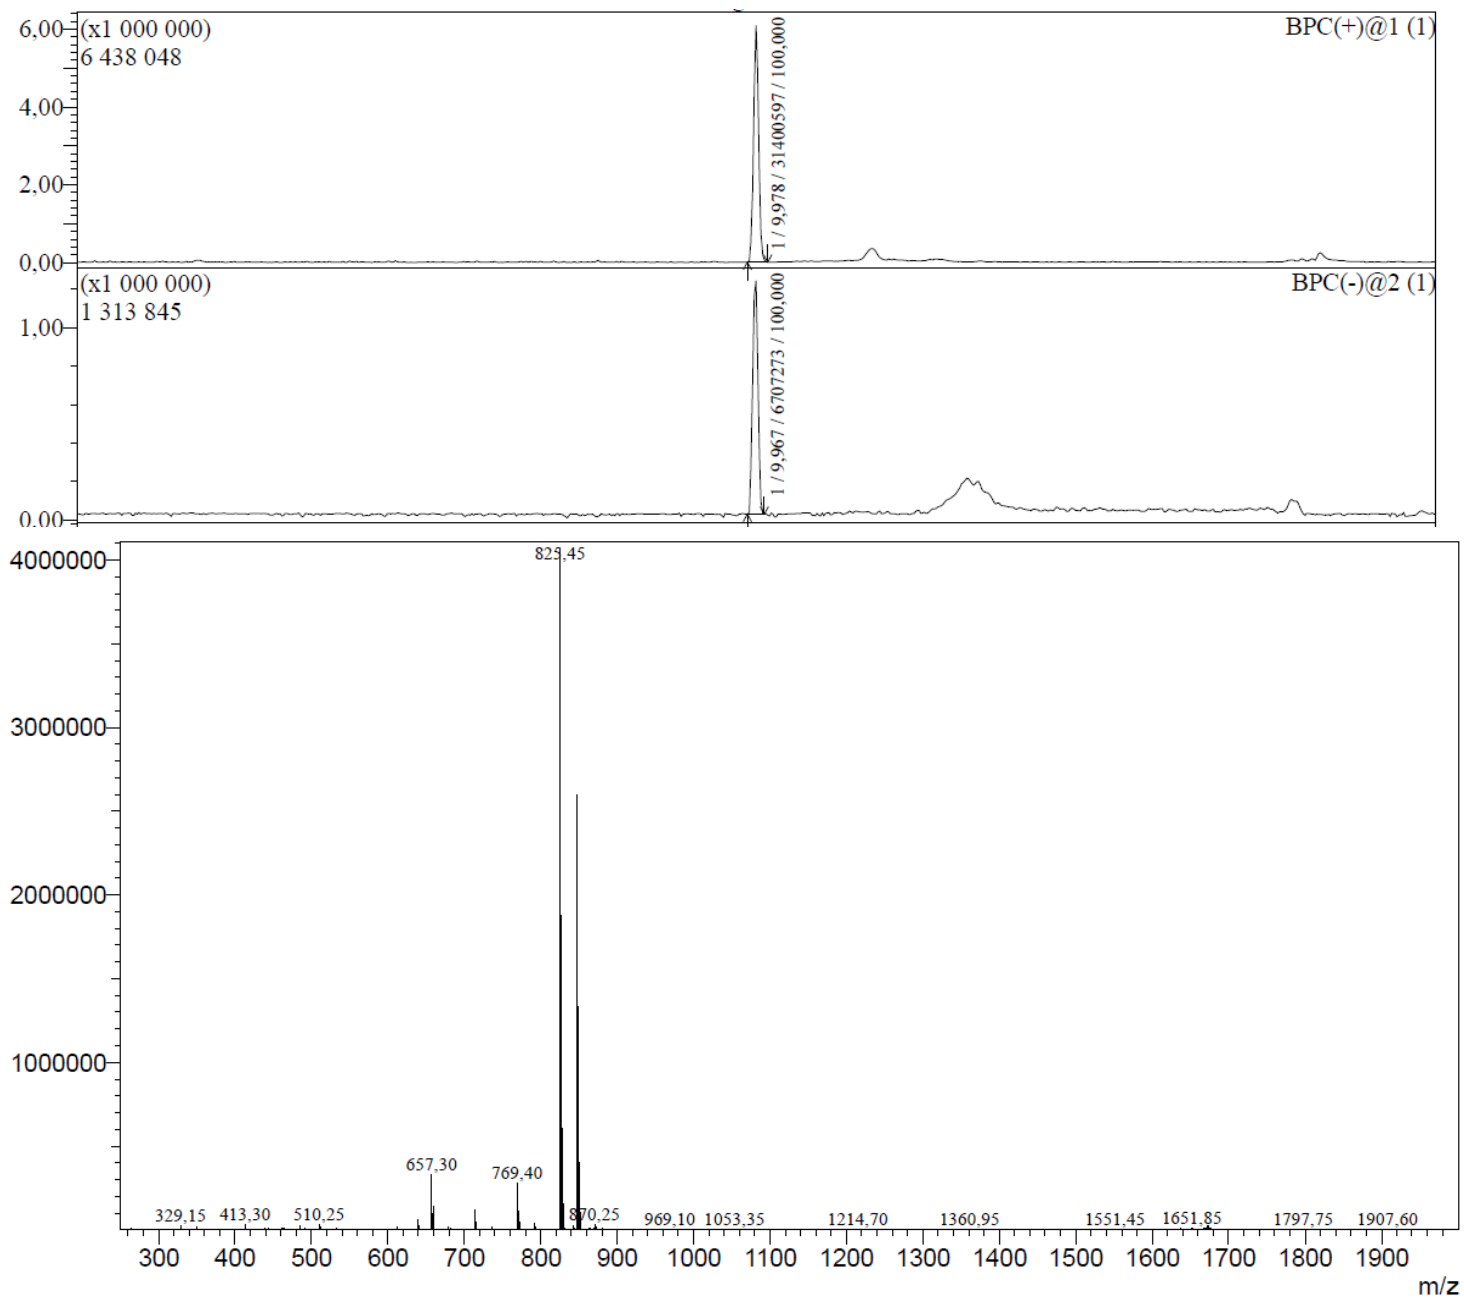

**Figure S8.** ESI-MS of compound № 6

# Compound 9

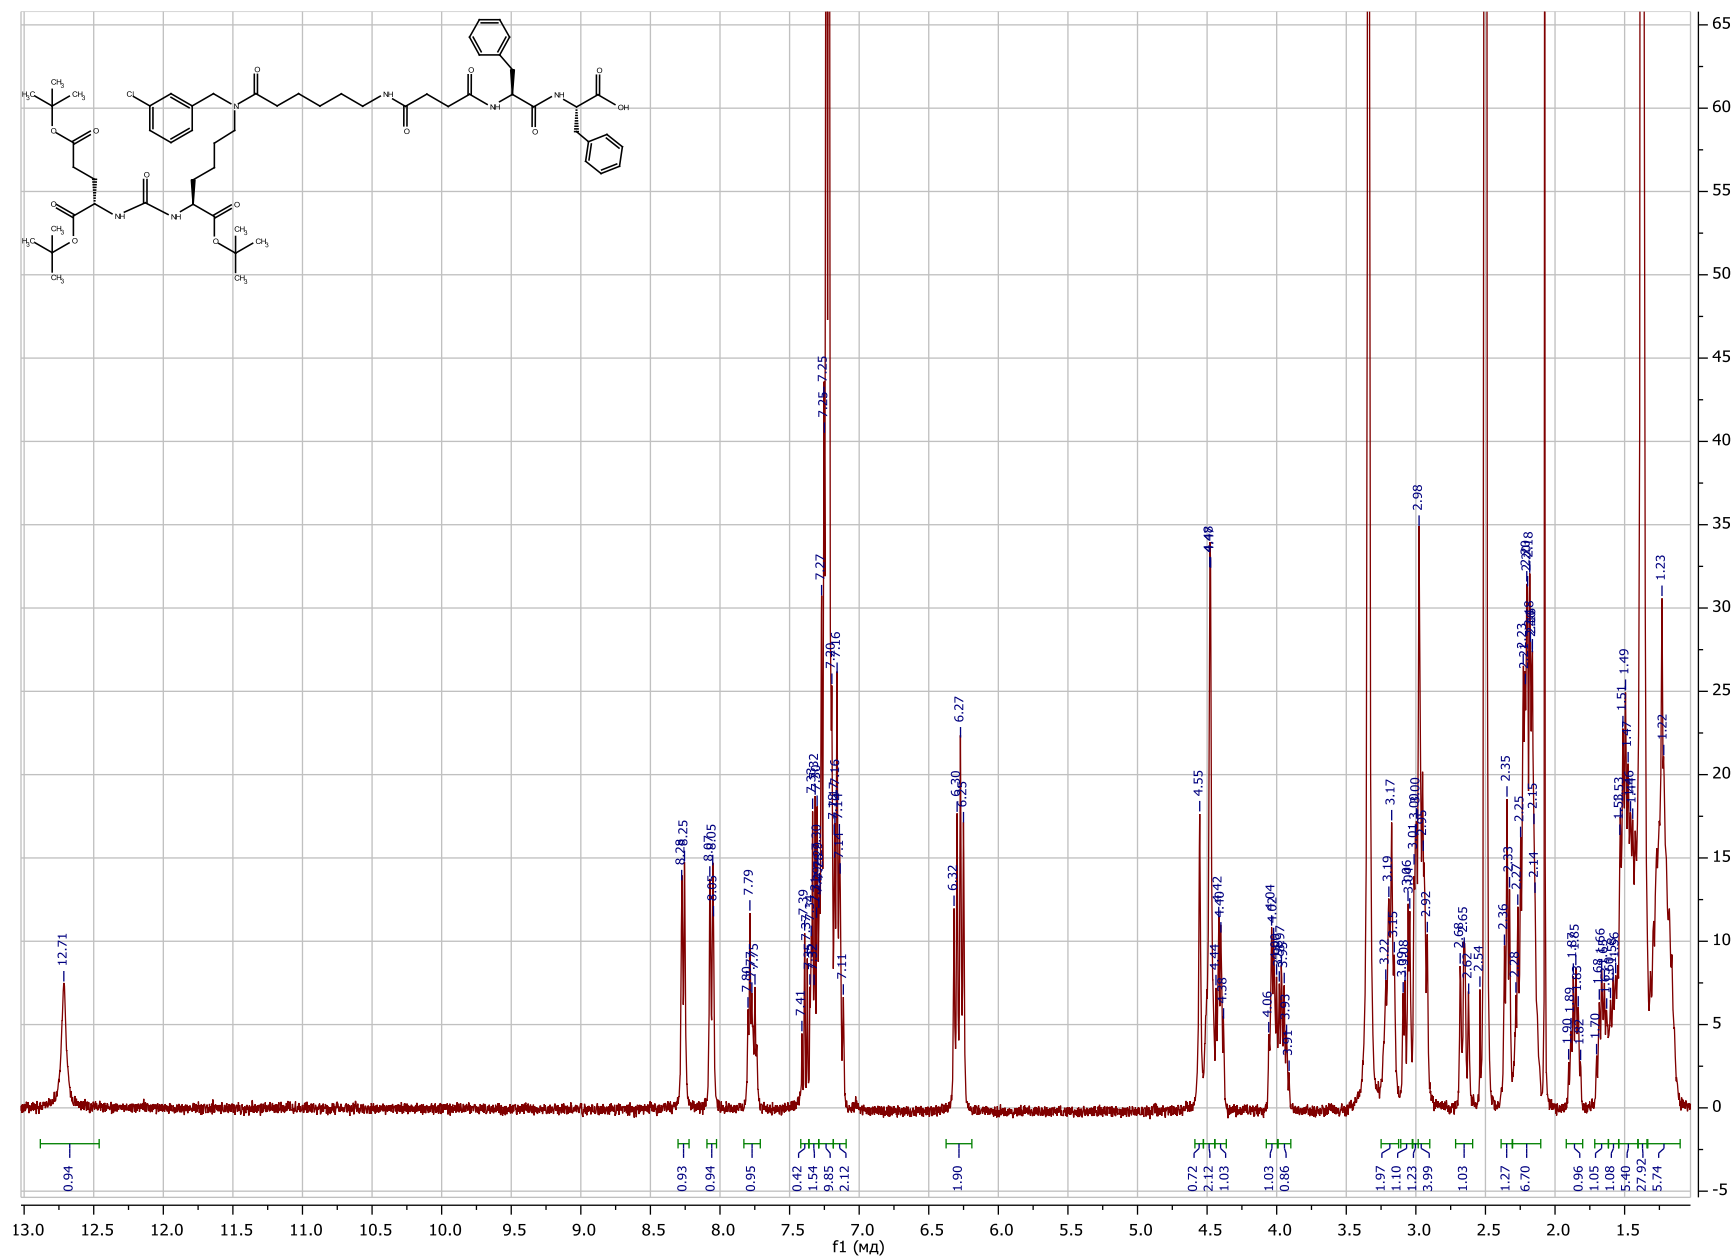

Figure S9. <sup>1</sup>H NMR spectrum of compound 9 in DMSO-*d*<sub>6</sub>.

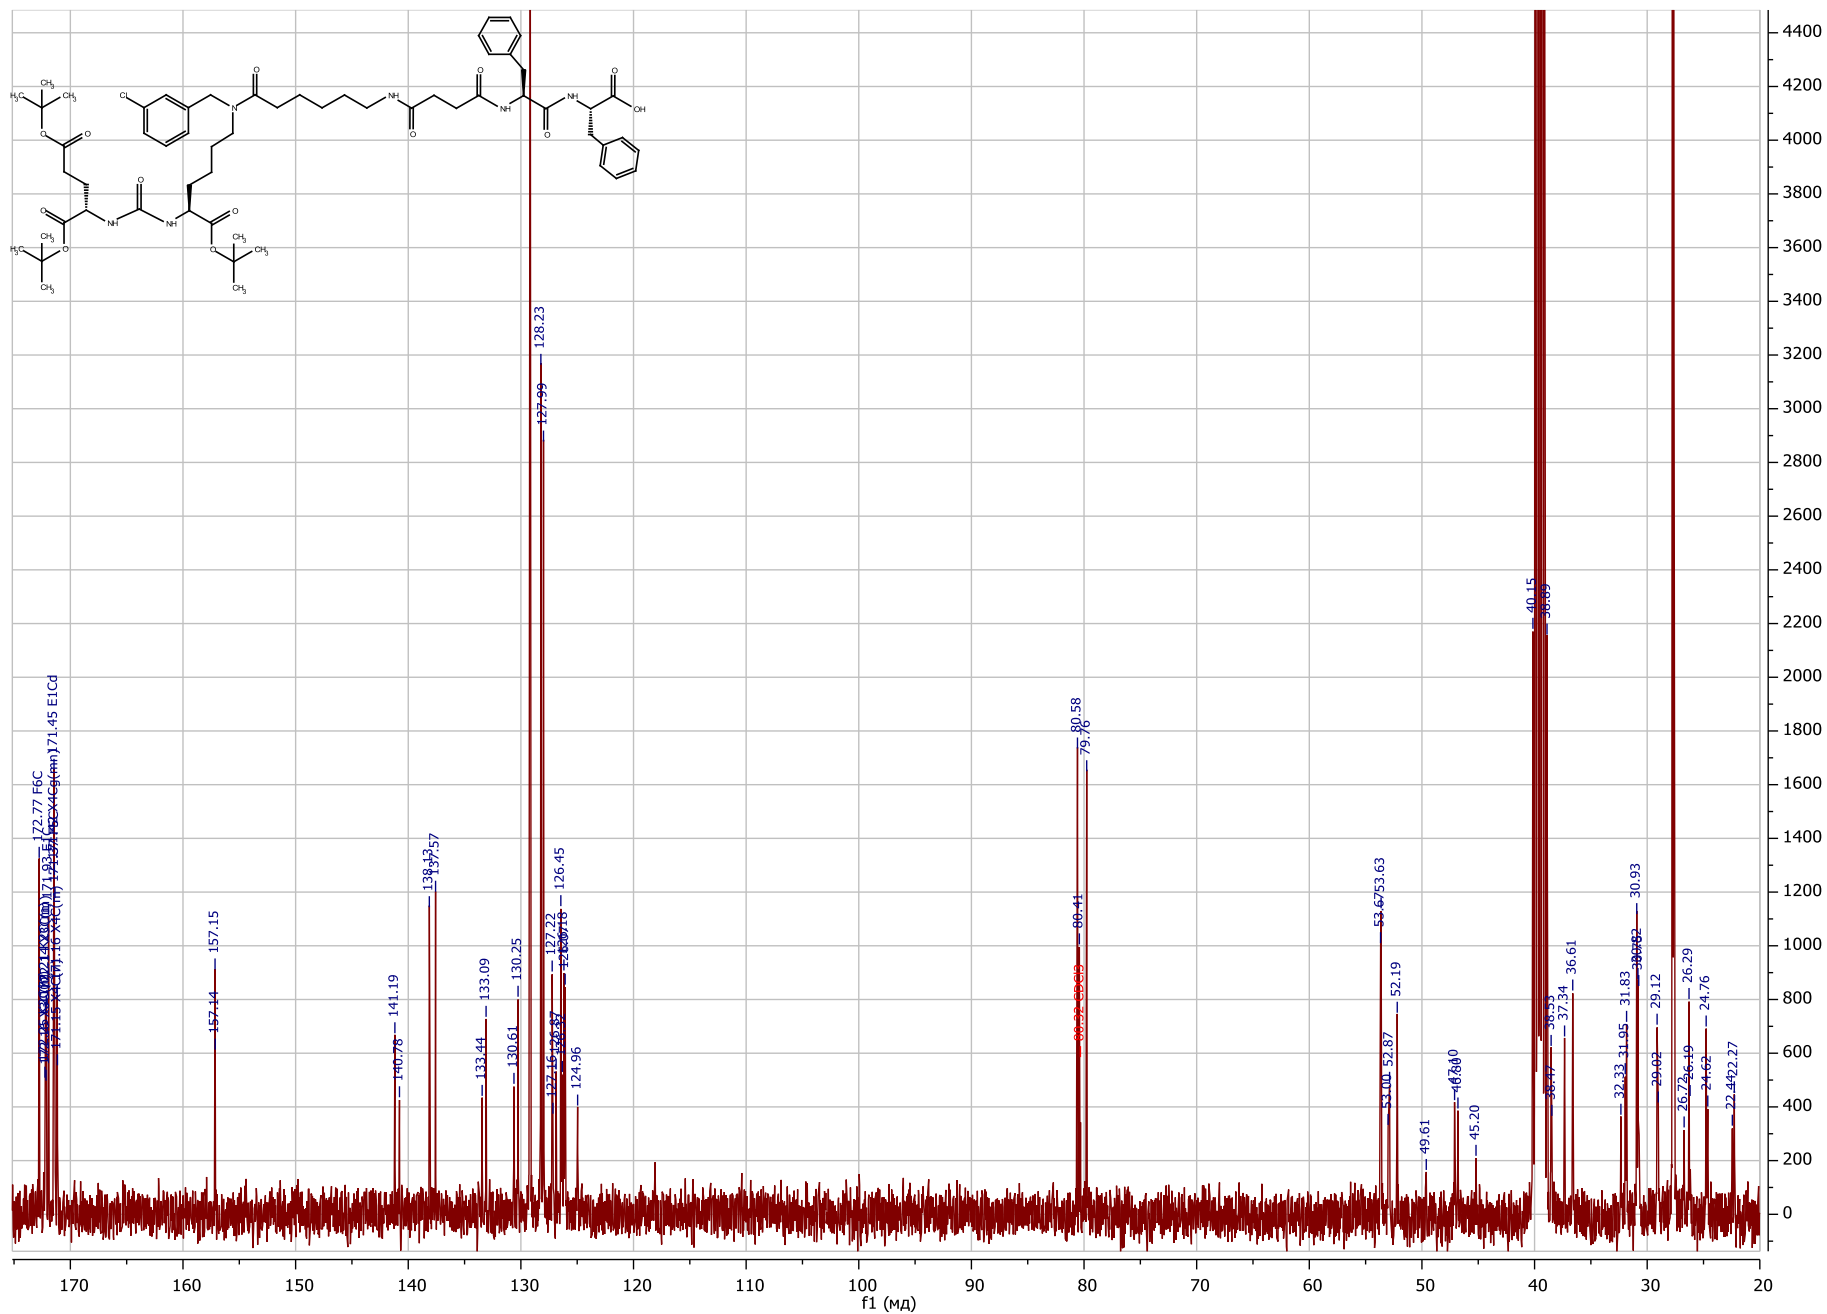

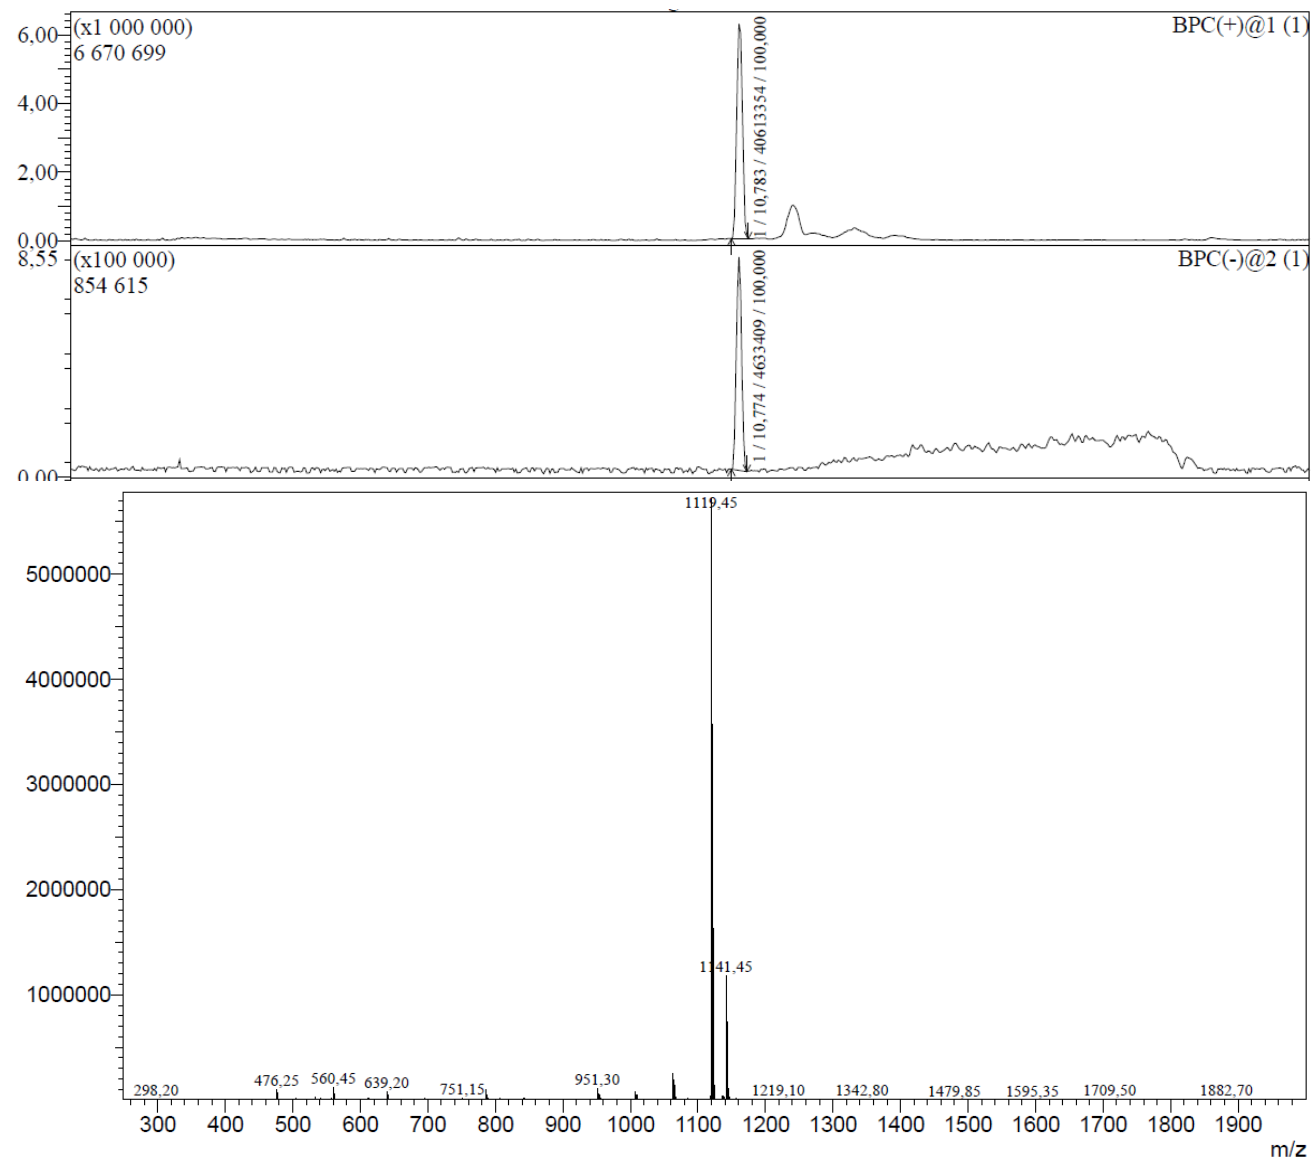

**Figure S11.** ESI-MS of compound № 9

Spectrum from 070320\_POS.wiff (sample 39) - PS-114, +TOF MS (200 - 3000) from 0.167 to 0.209 min, subtracted by (Spectrum from 070320\_POS.wiff (sample 39) - PS-114, +TOF MS (200 - 3000) from 0.079 to 0.125 min)

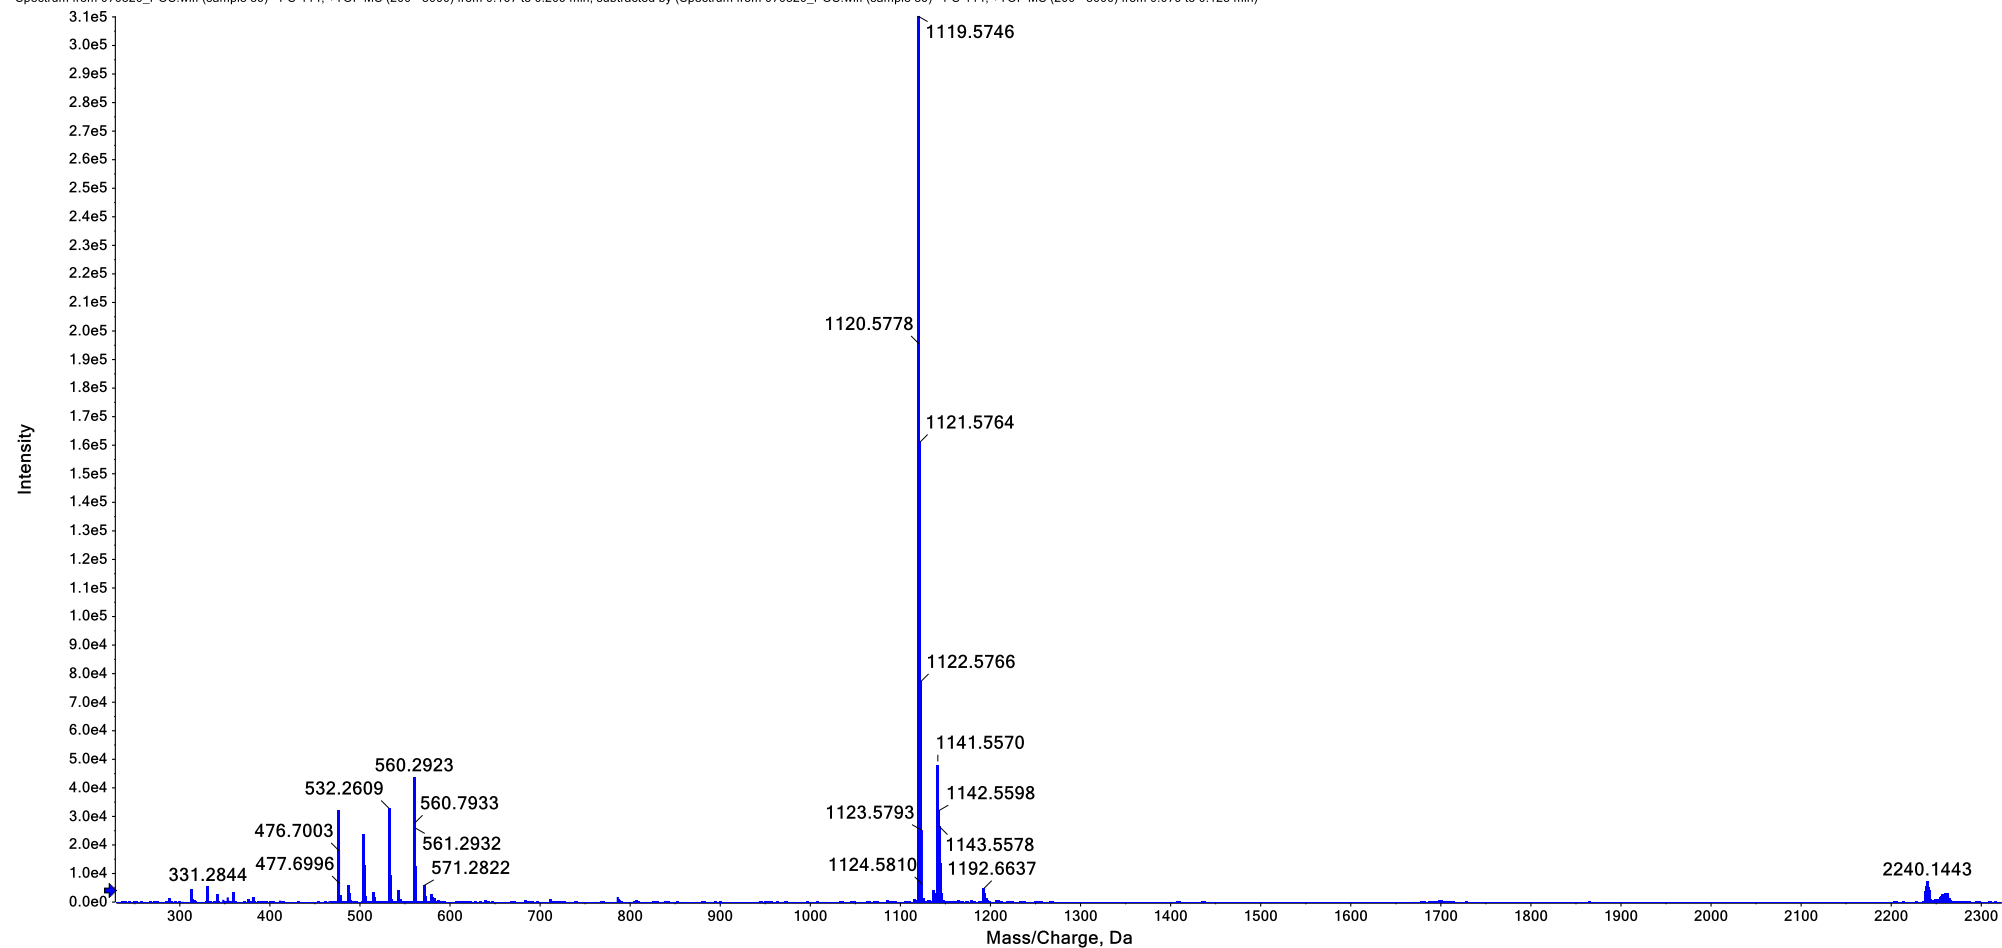

**Figure S12.** HRMS (m/z, ESI) of compound No 9

# Compound 10

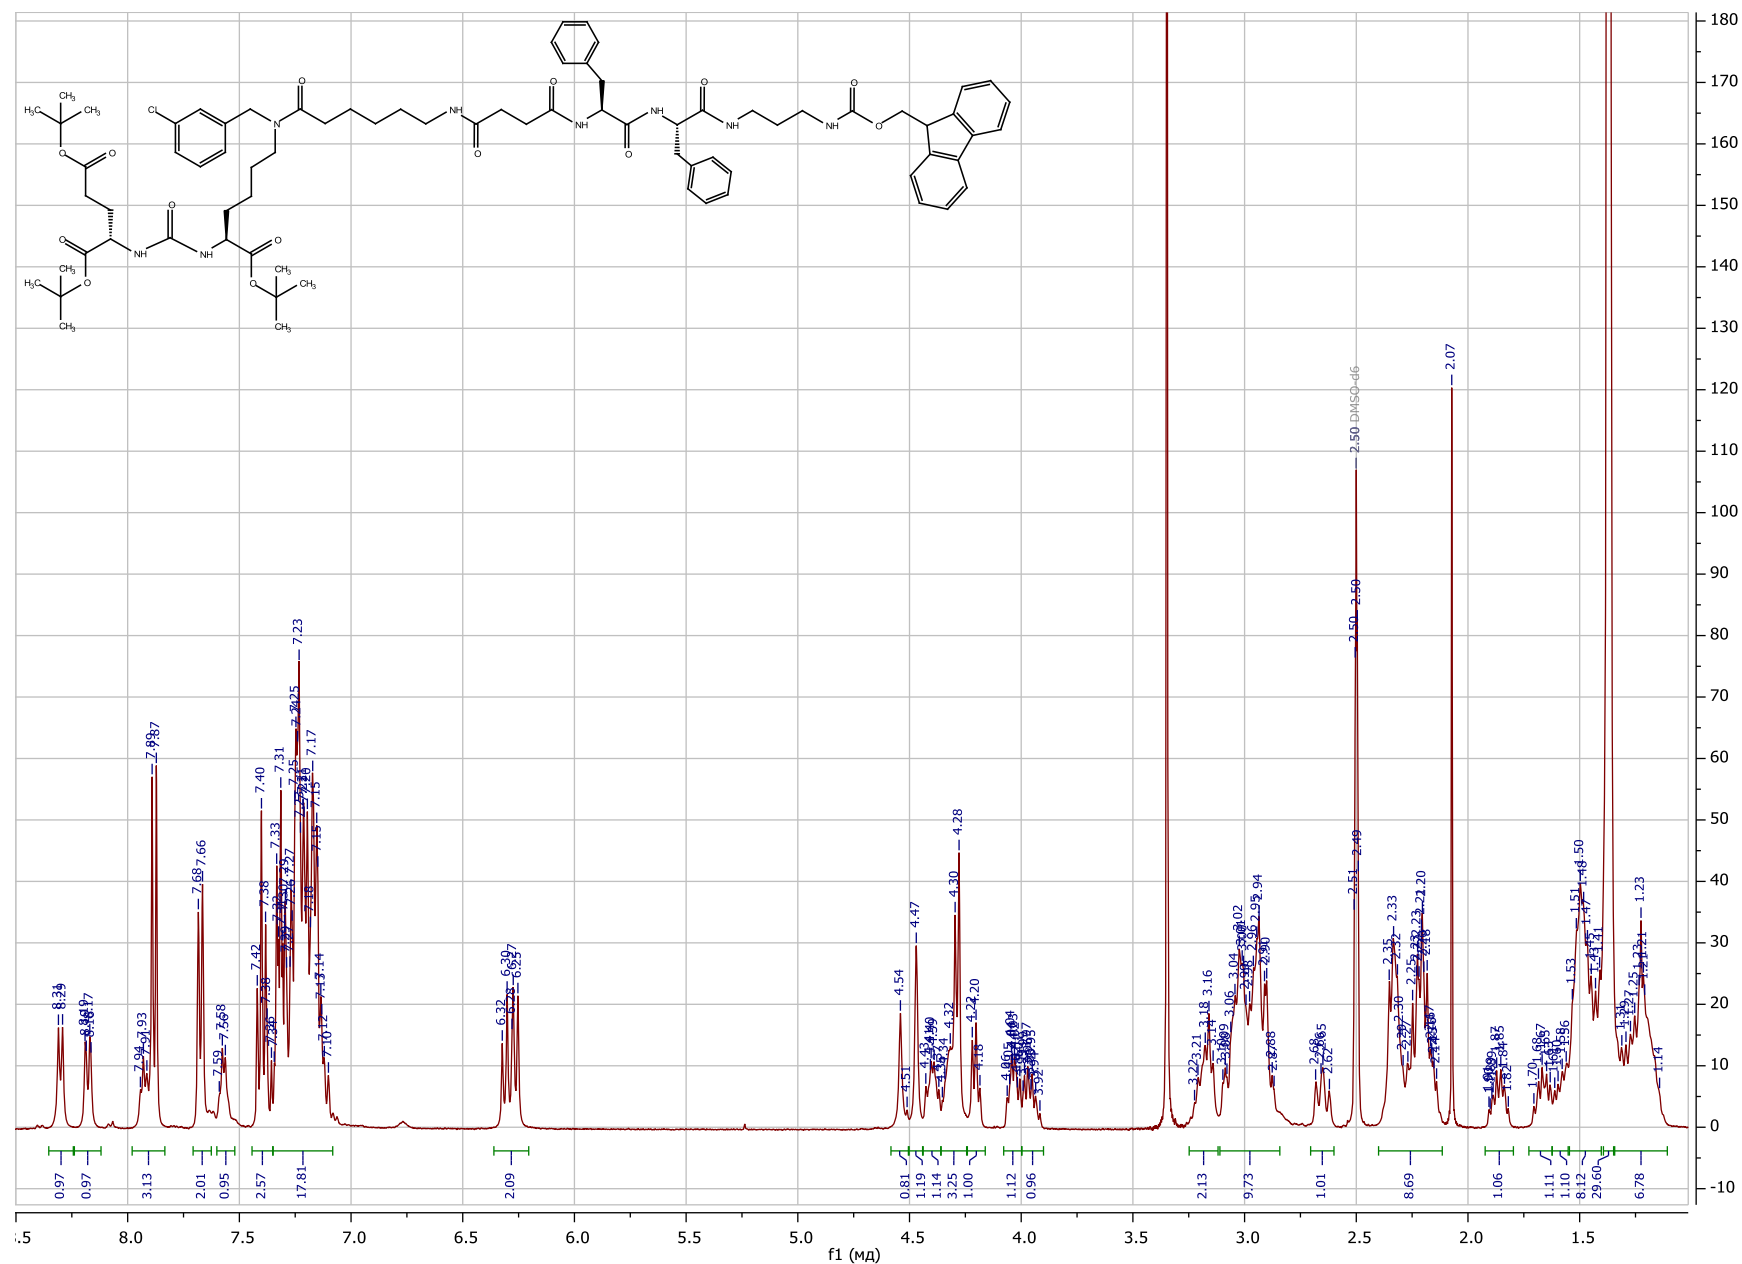

Figure S13. <sup>1</sup>H NMR spectrum of compound N<sup>o</sup> 10 in DMSO-*d*<sub>6</sub>.



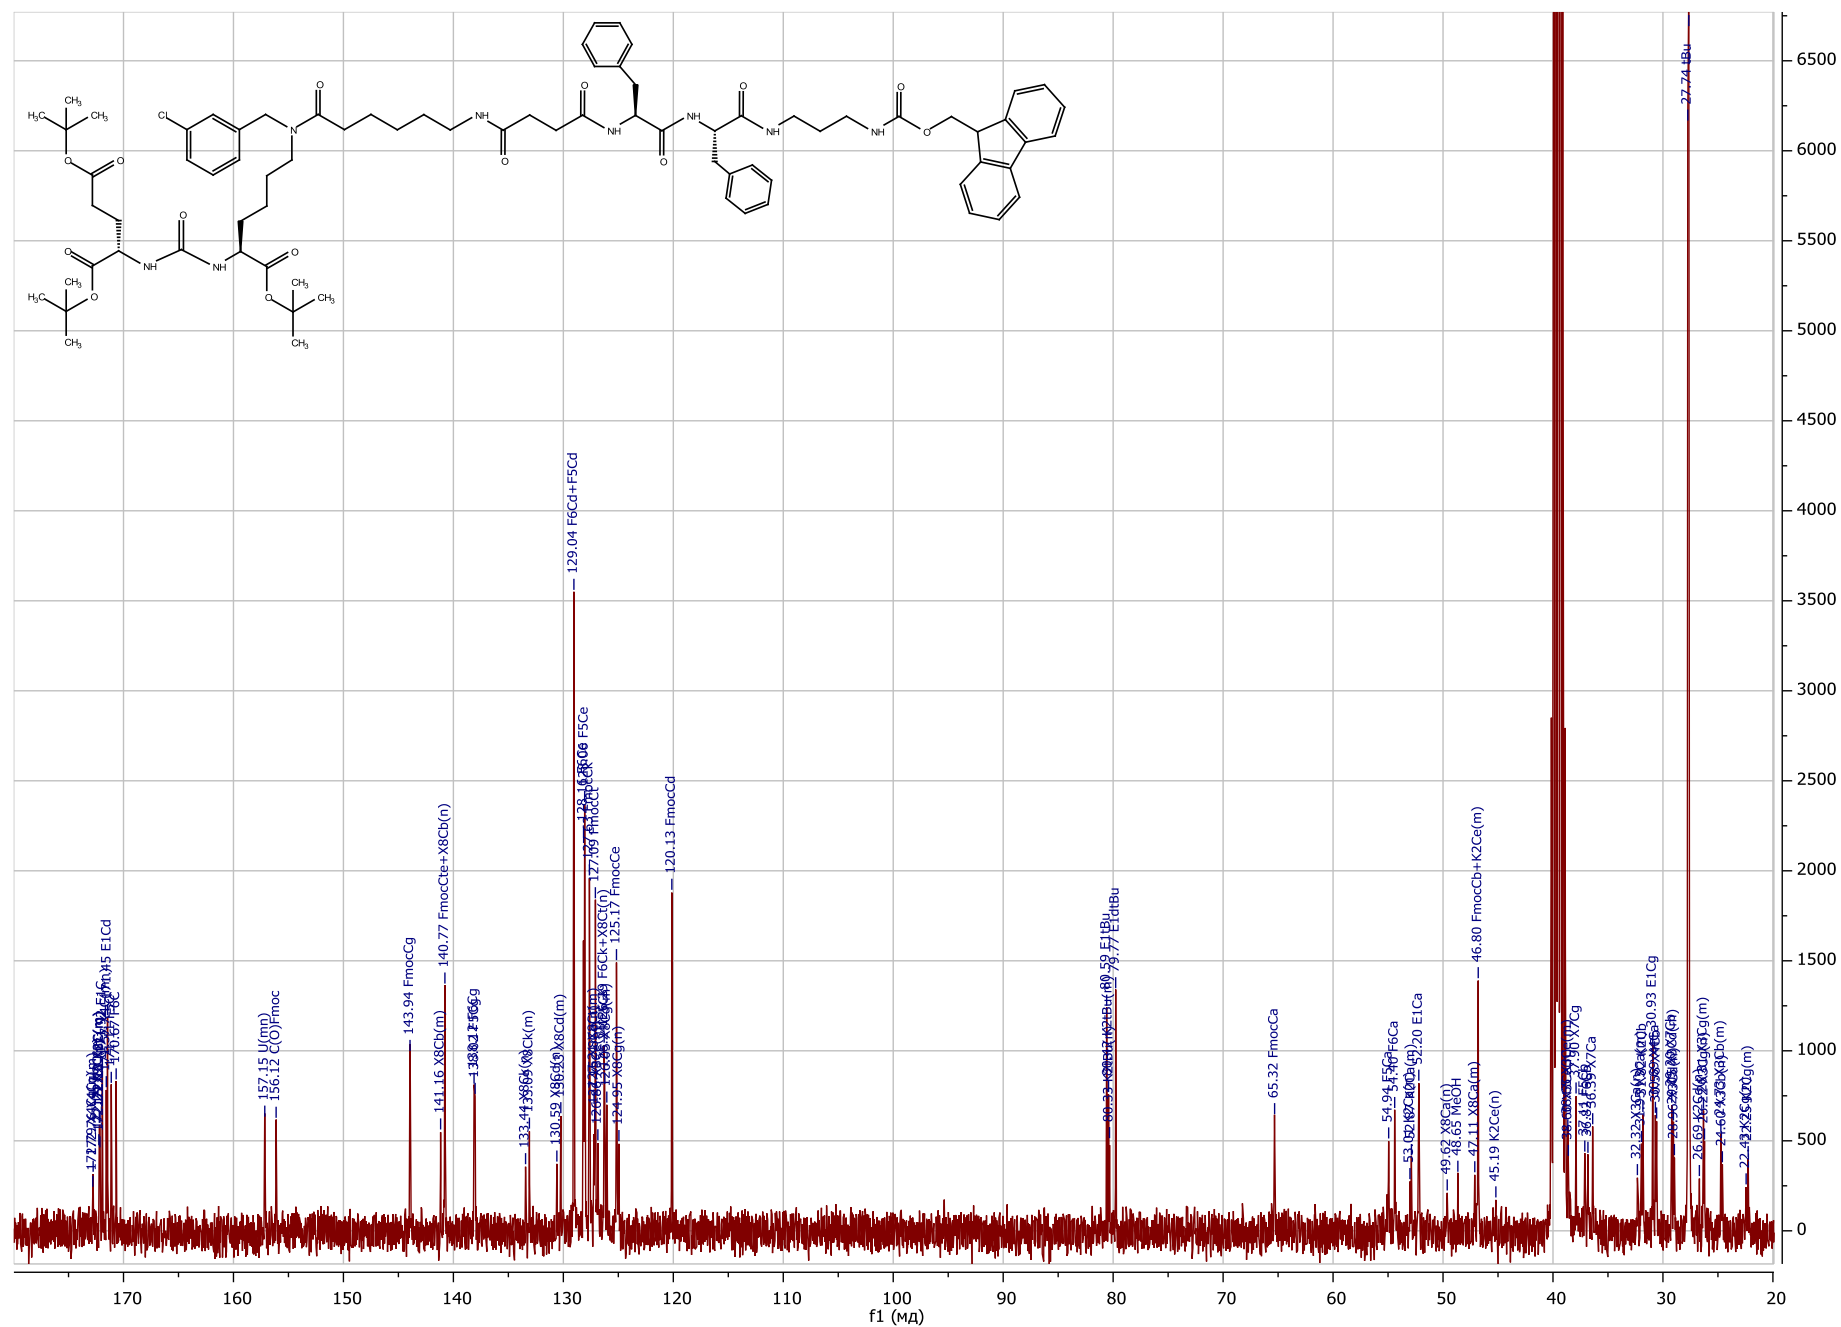

Figure S14.  $^{13}\text{C}$  NMR spectrum of compound № 10 in  $\text{DMSO}-d_6$ .

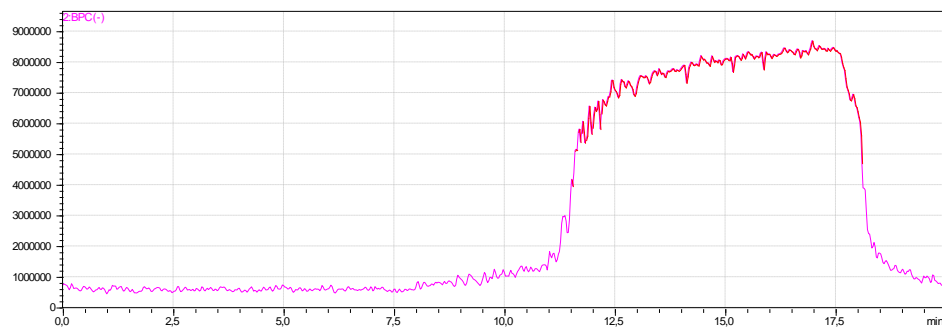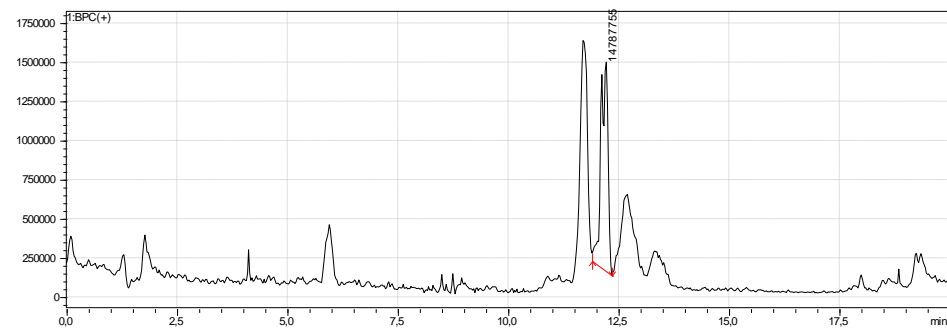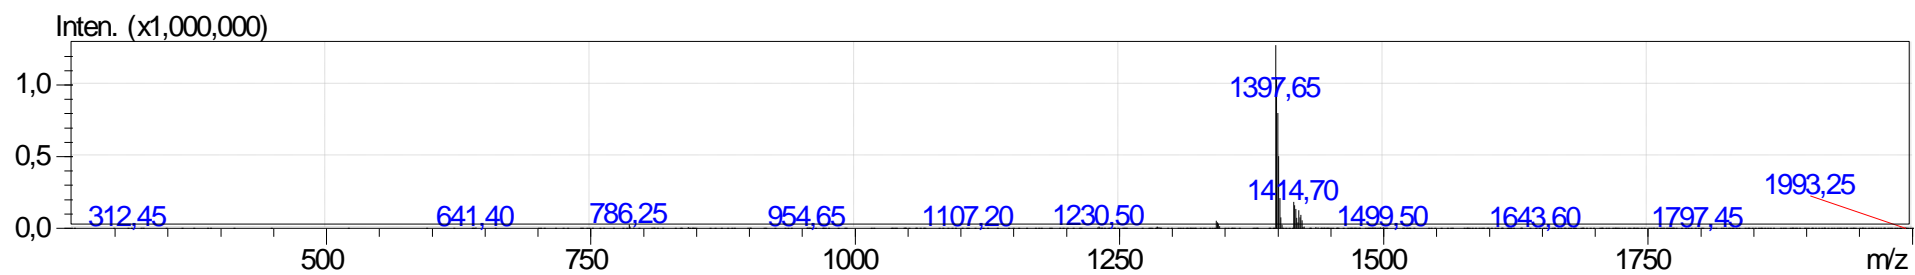

Figure S15. ESI-MS of compound № 10

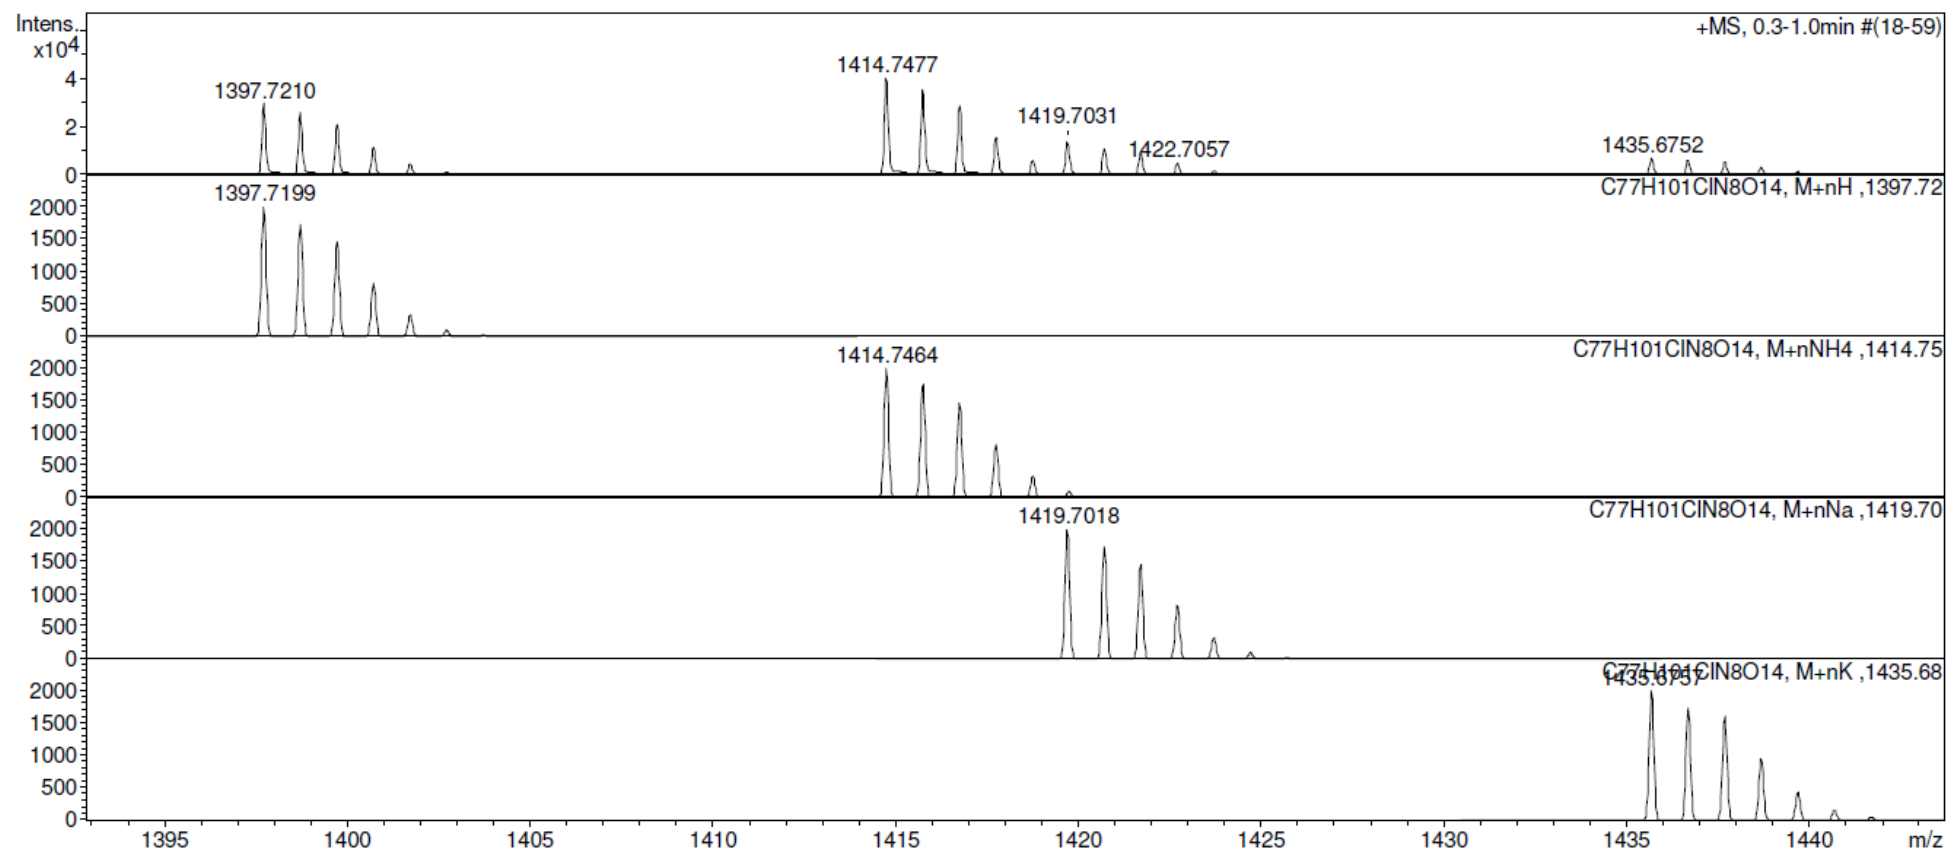

**Figure S16.** HRMS (m/z, ESI) of compound No 10

## Compound 11

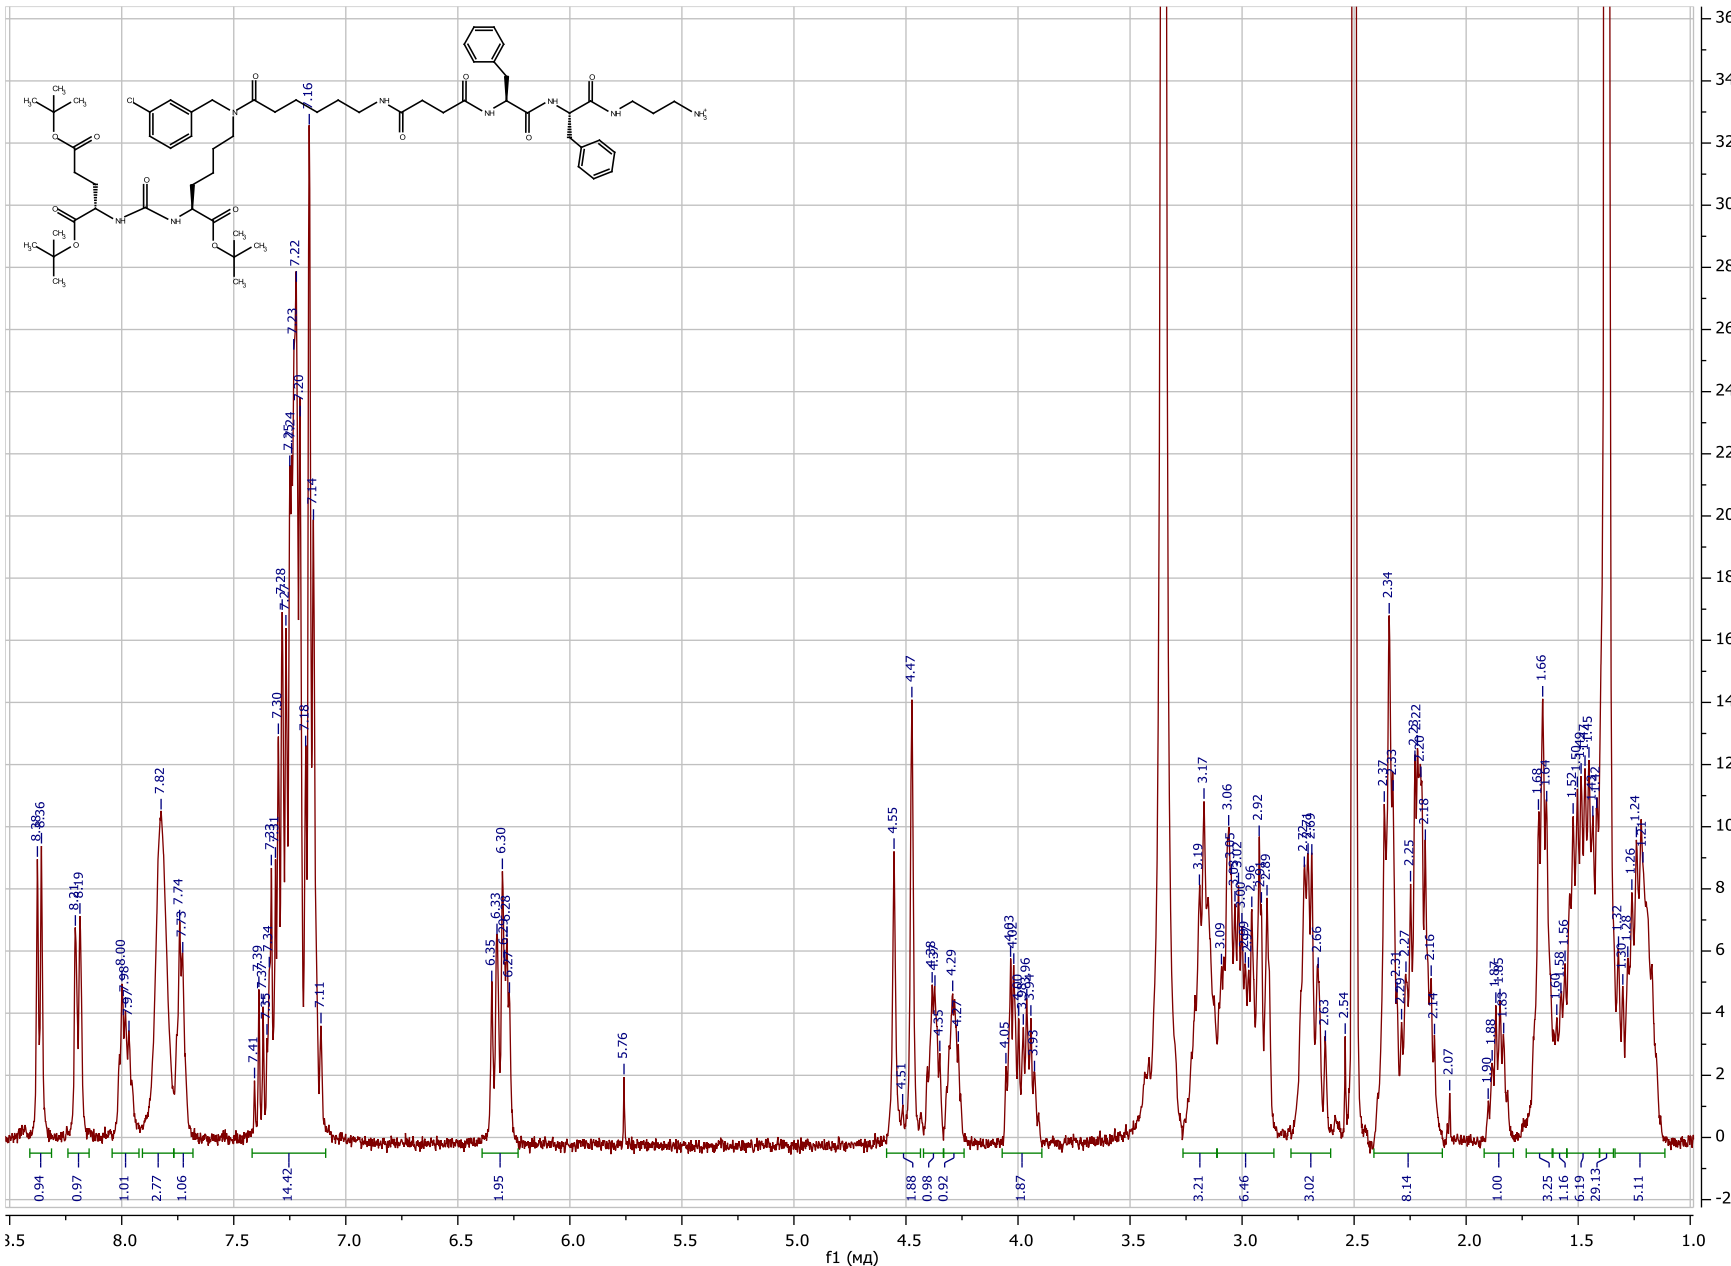

**Figure S17.**  $^1\text{H}$  NMR spectrum of compound **11** in  $\text{DMSO}-d_6$ .



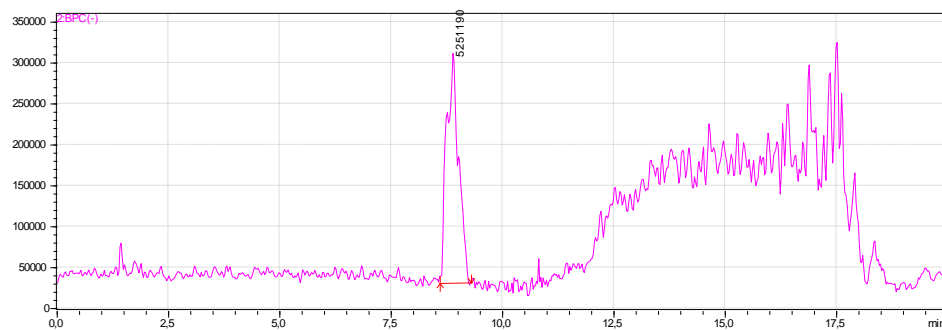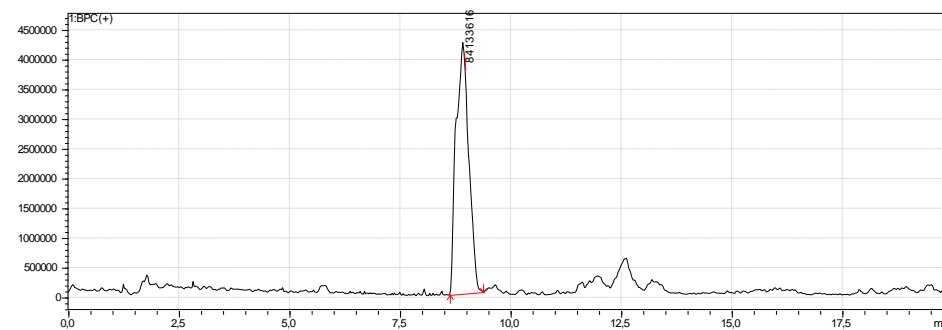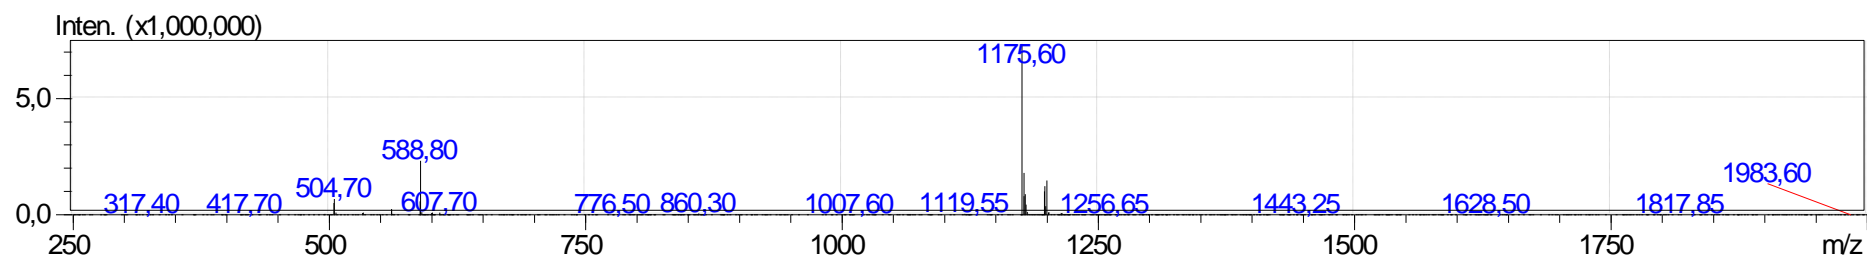

**Figure S19.** ESI-MS of compound № 11

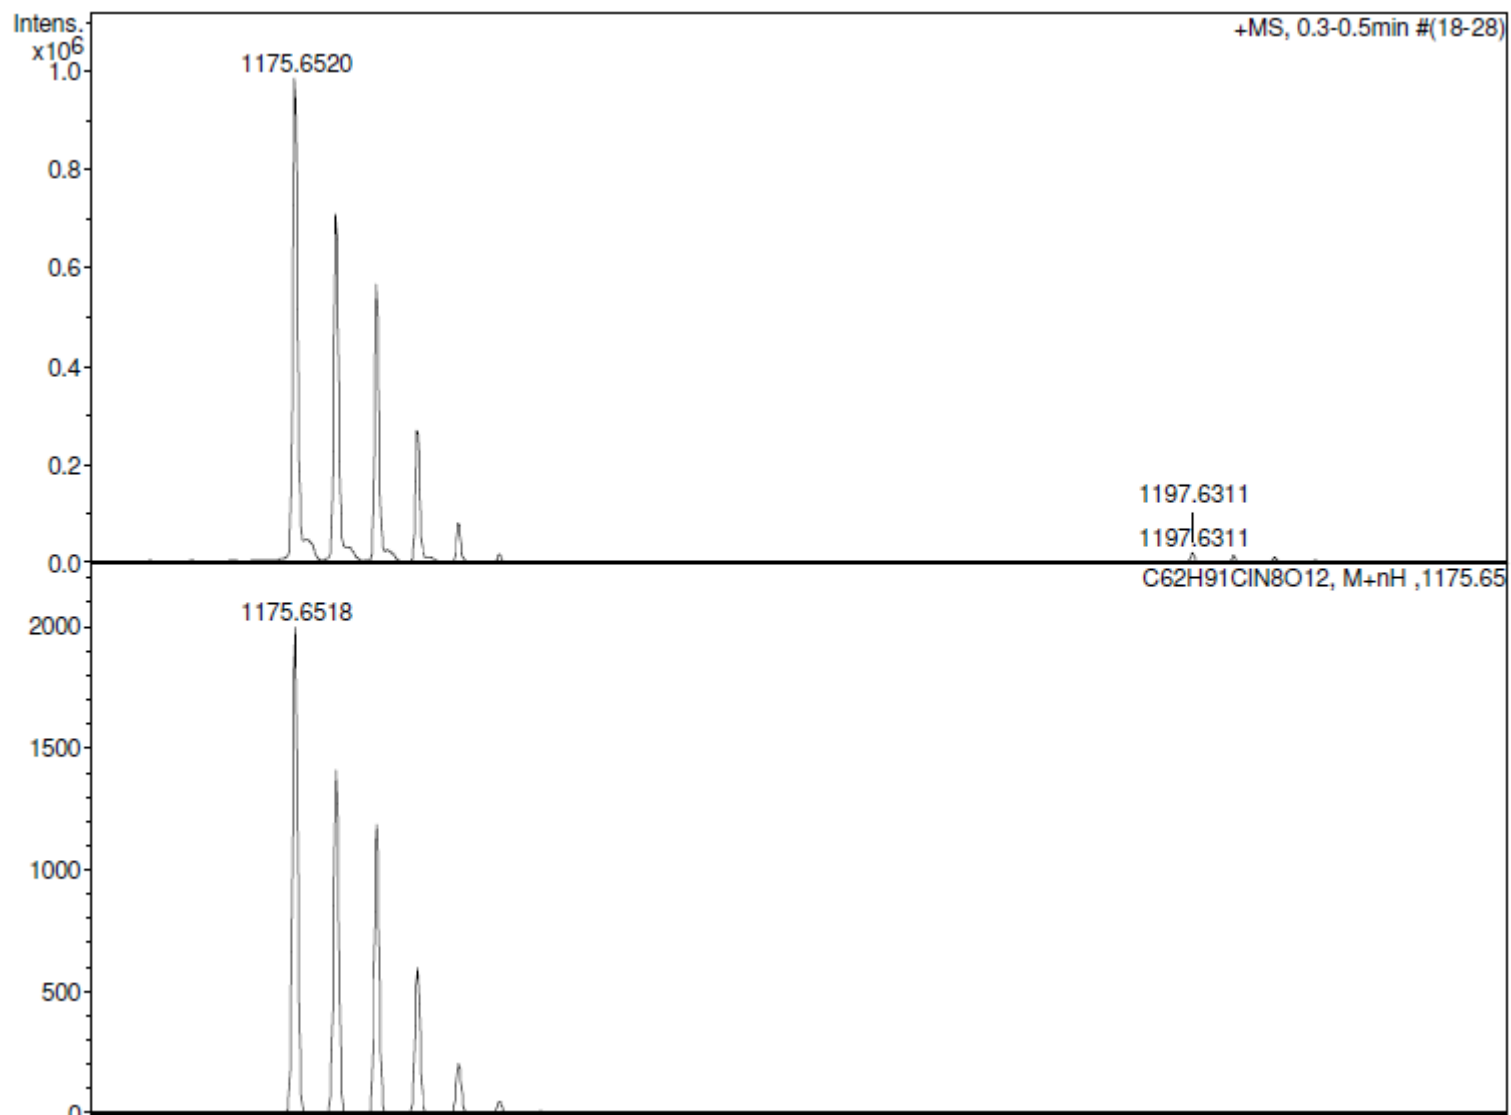

**Figure S20.** HRMS (m/z, ESI) of compound № 11

# Compound 13

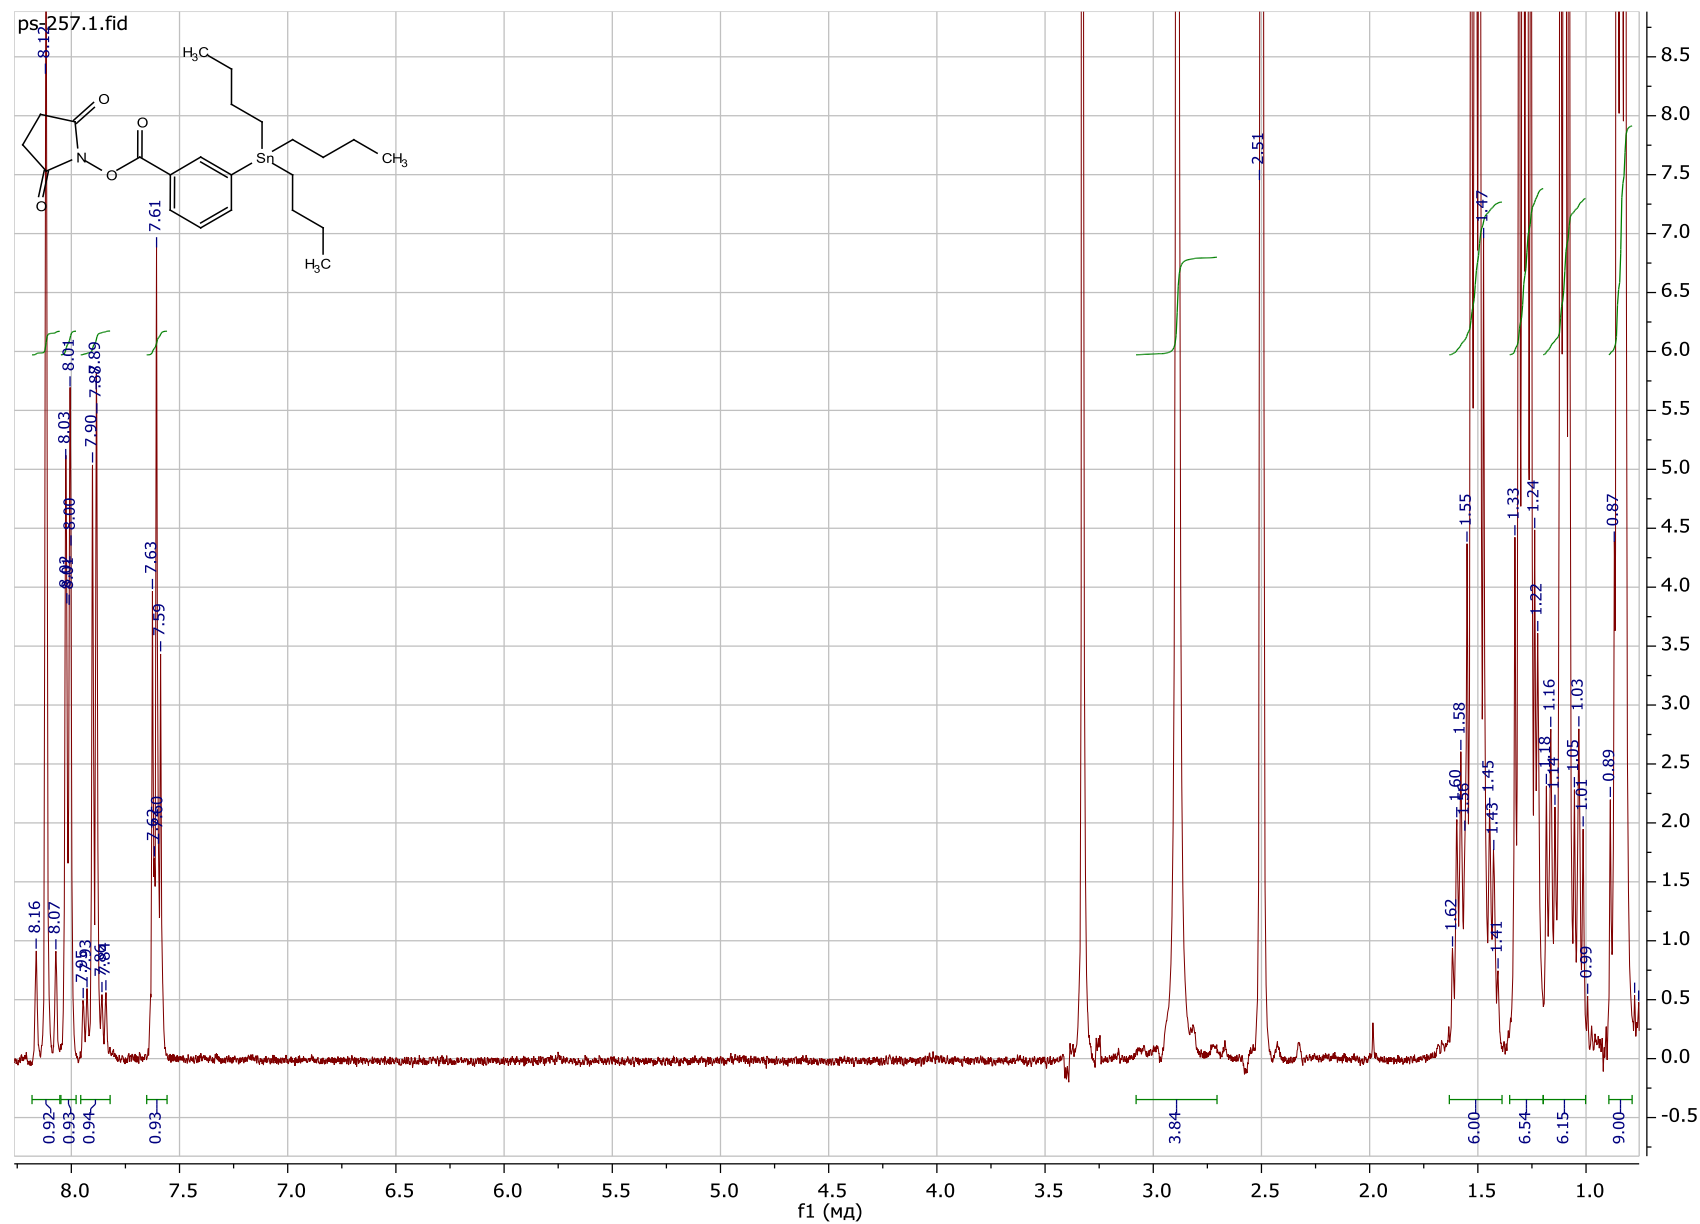

Figure S21. <sup>1</sup>H NMR spectrum of compound № 13 in DMSO-*d*<sub>6</sub>.



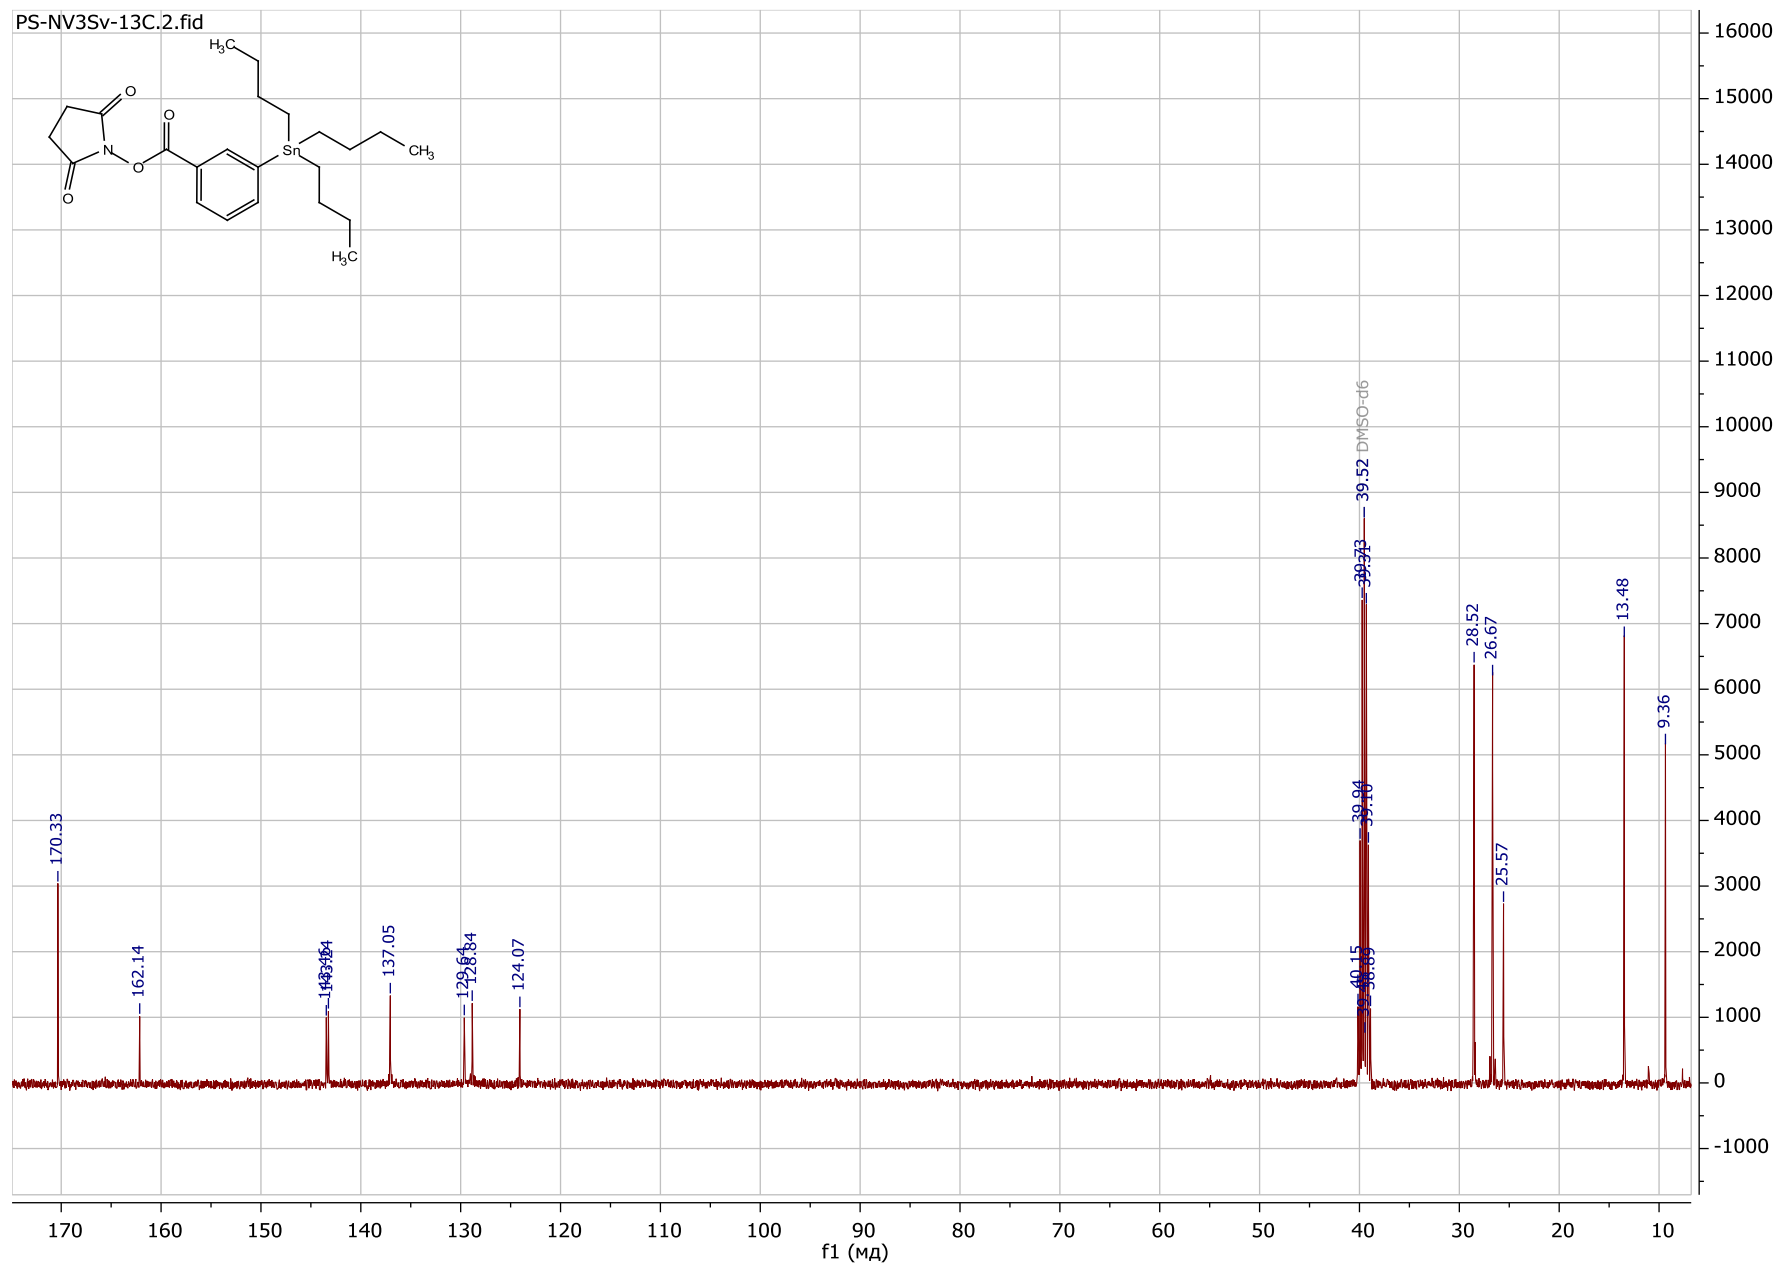

**Figure S22.**  $^{13}\text{C}$  NMR spectrum of compound **13** in  $\text{DMSO}-d_6$ .

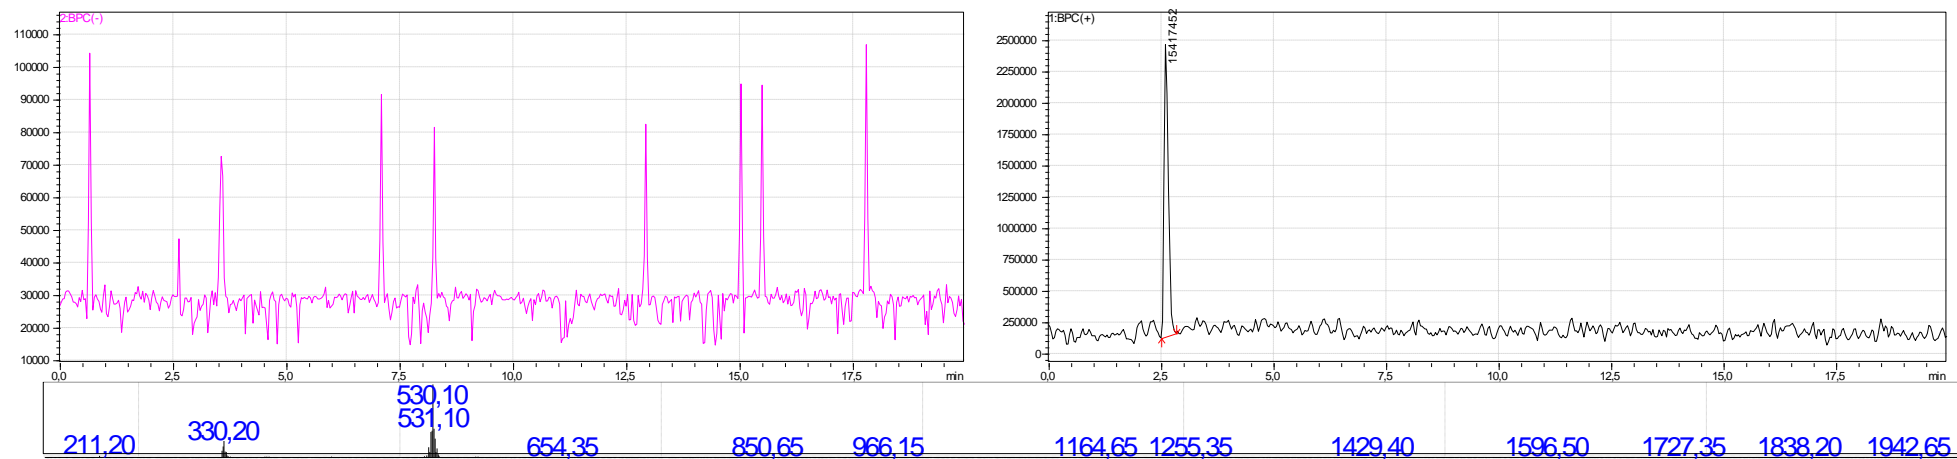

**Figure S23.** ESI-MS of compound № 13

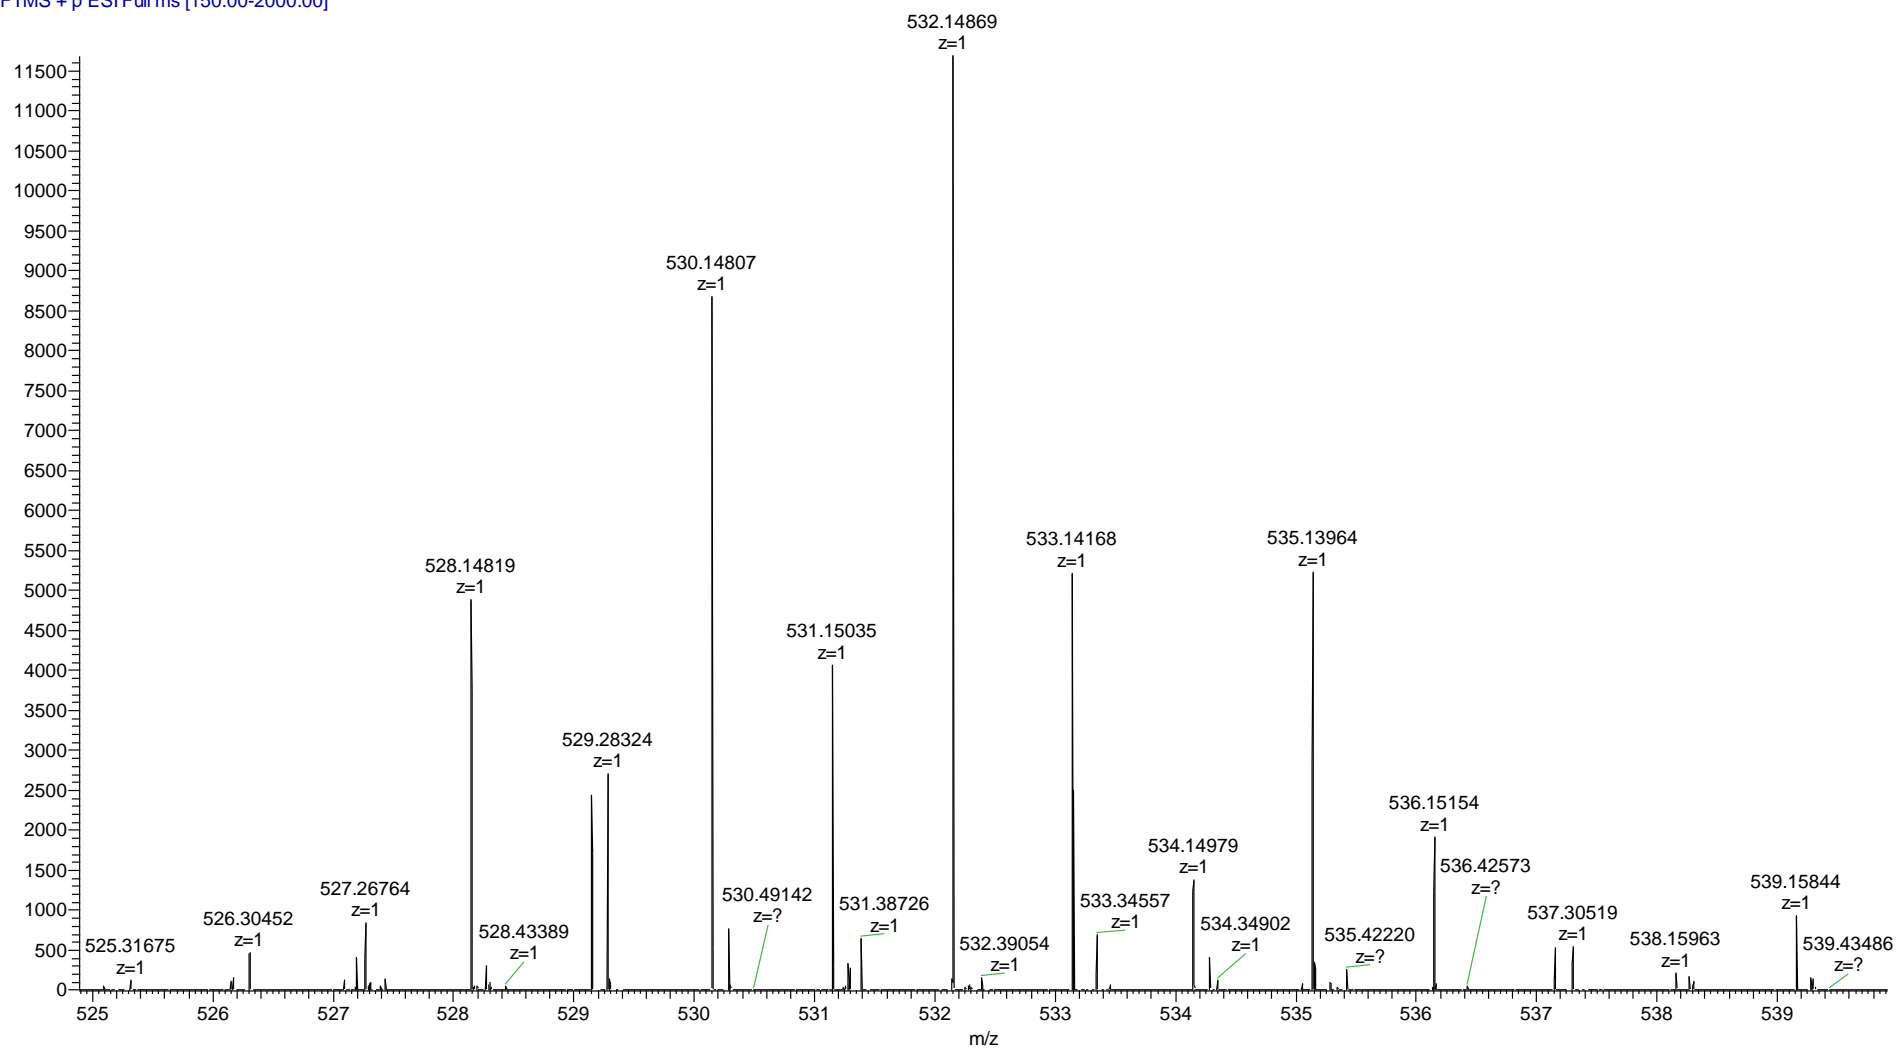

Figure S24. HRMS (m/z, ESI) of compound № 13

# Compound 14

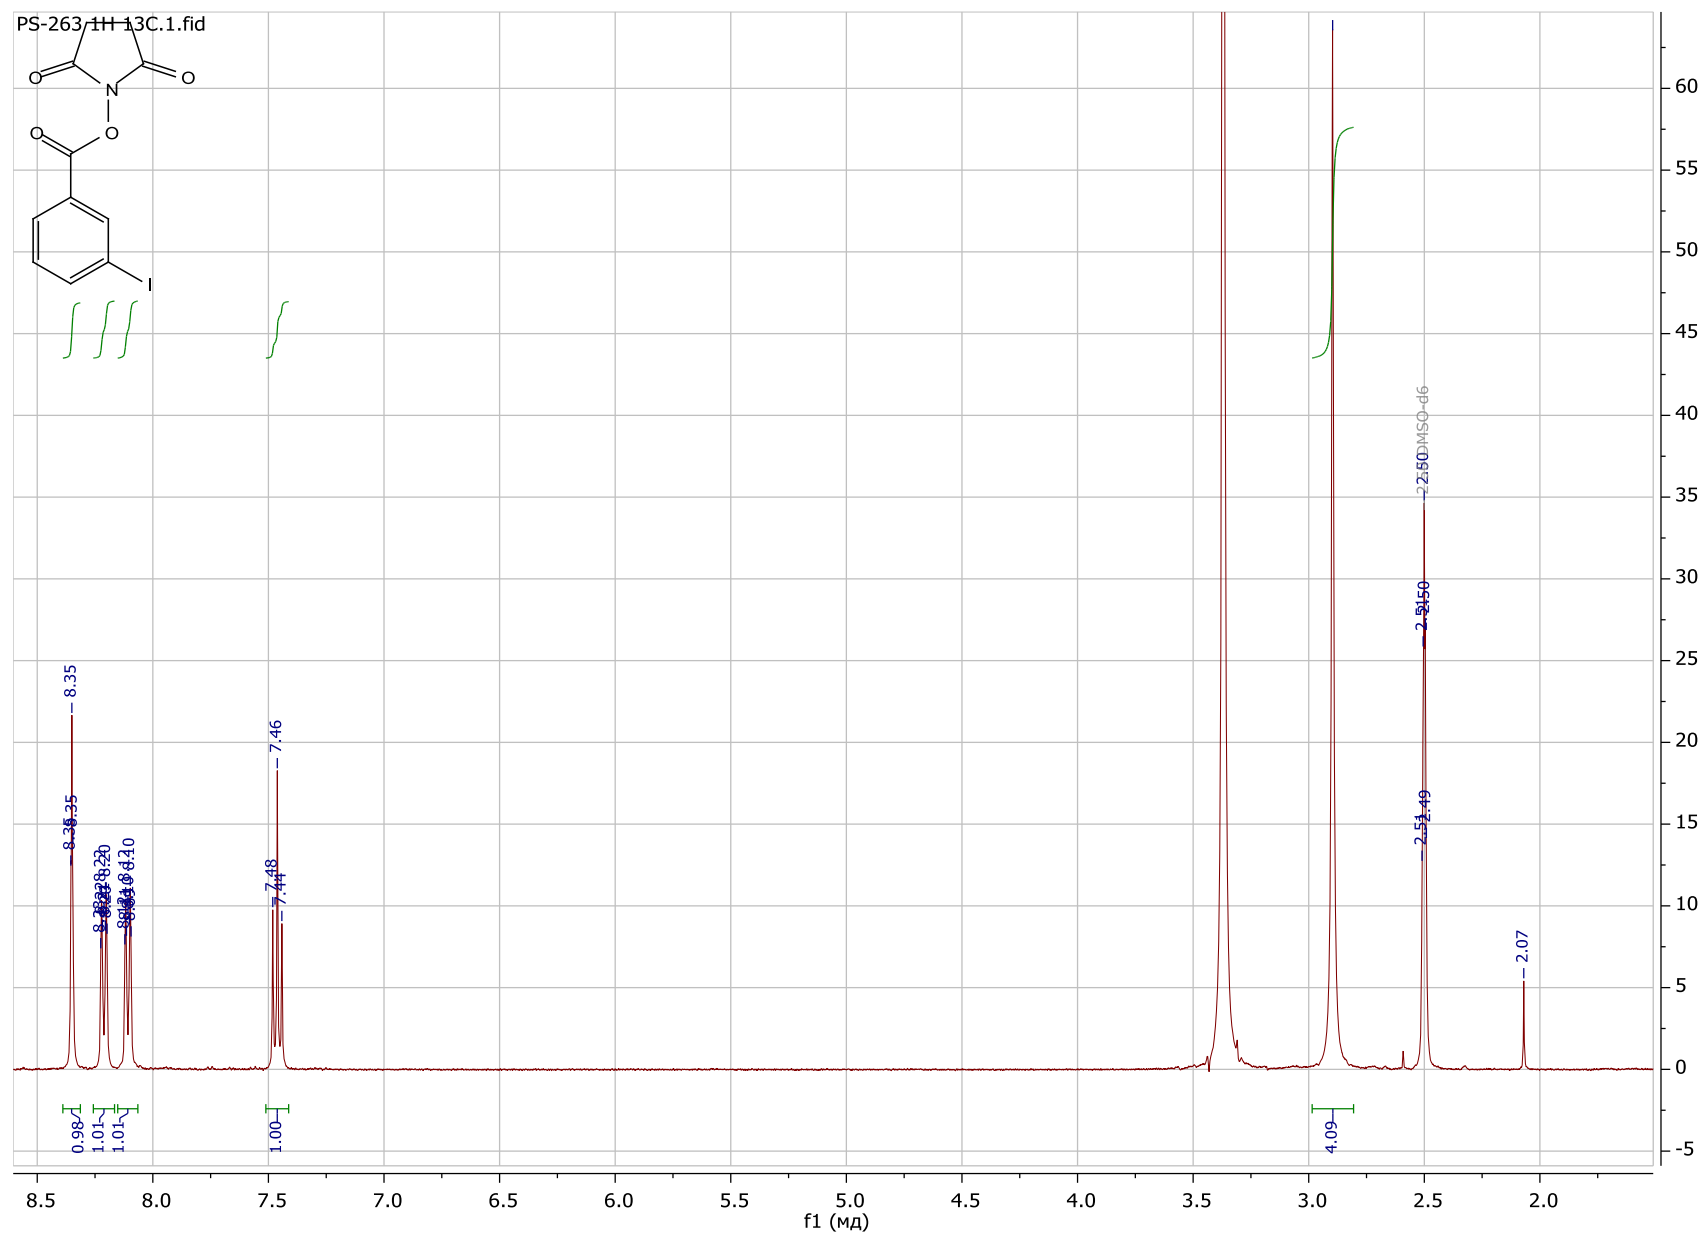

Figure S25. <sup>1</sup>H NMR spectrum of compound No 14 in DMSO-*d*<sub>6</sub>.

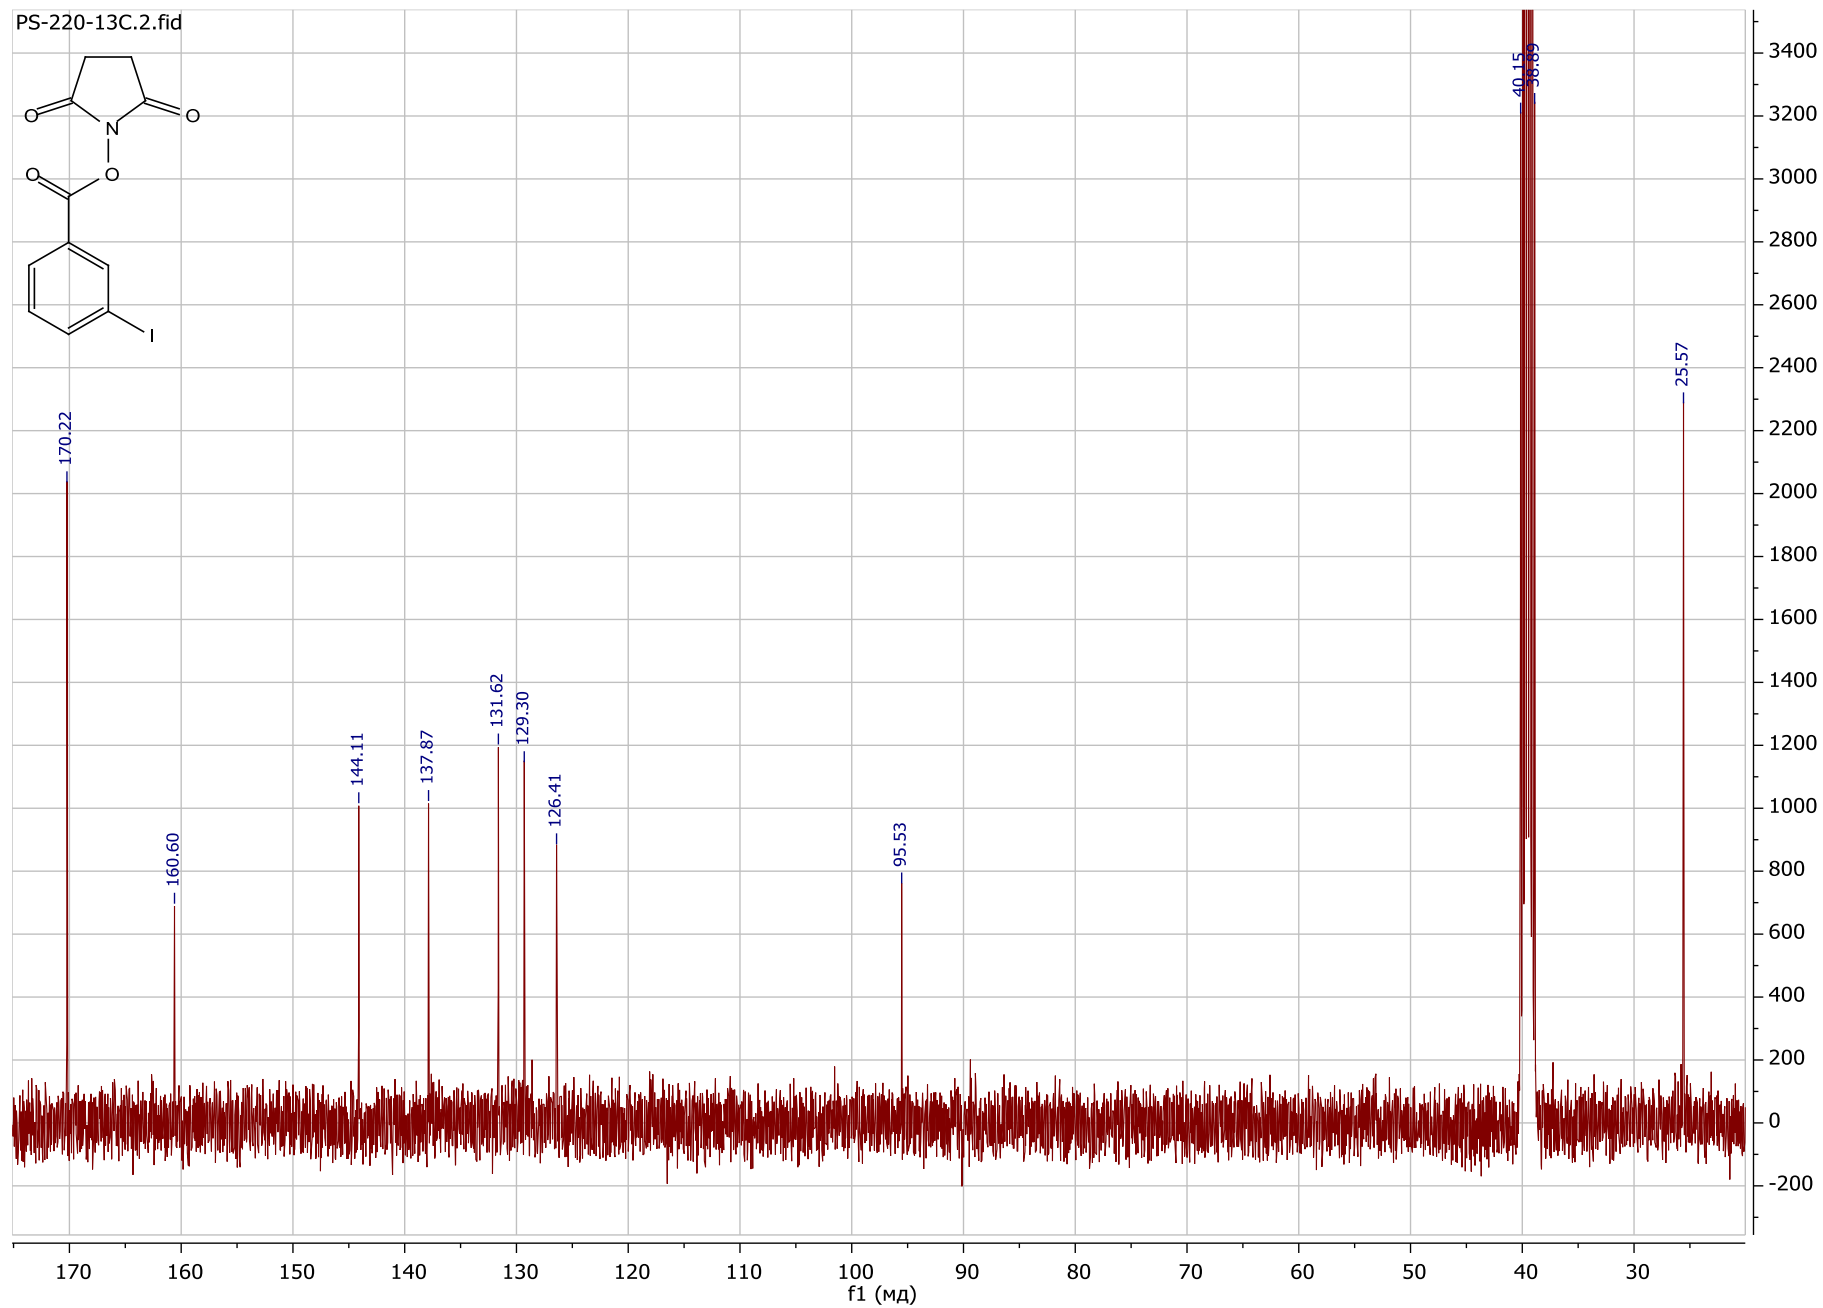

Figure S26.  $^{13}\text{C}$  NMR spectrum of compound **14** in  $\text{DMSO}-d_6$ .

## Compound 16

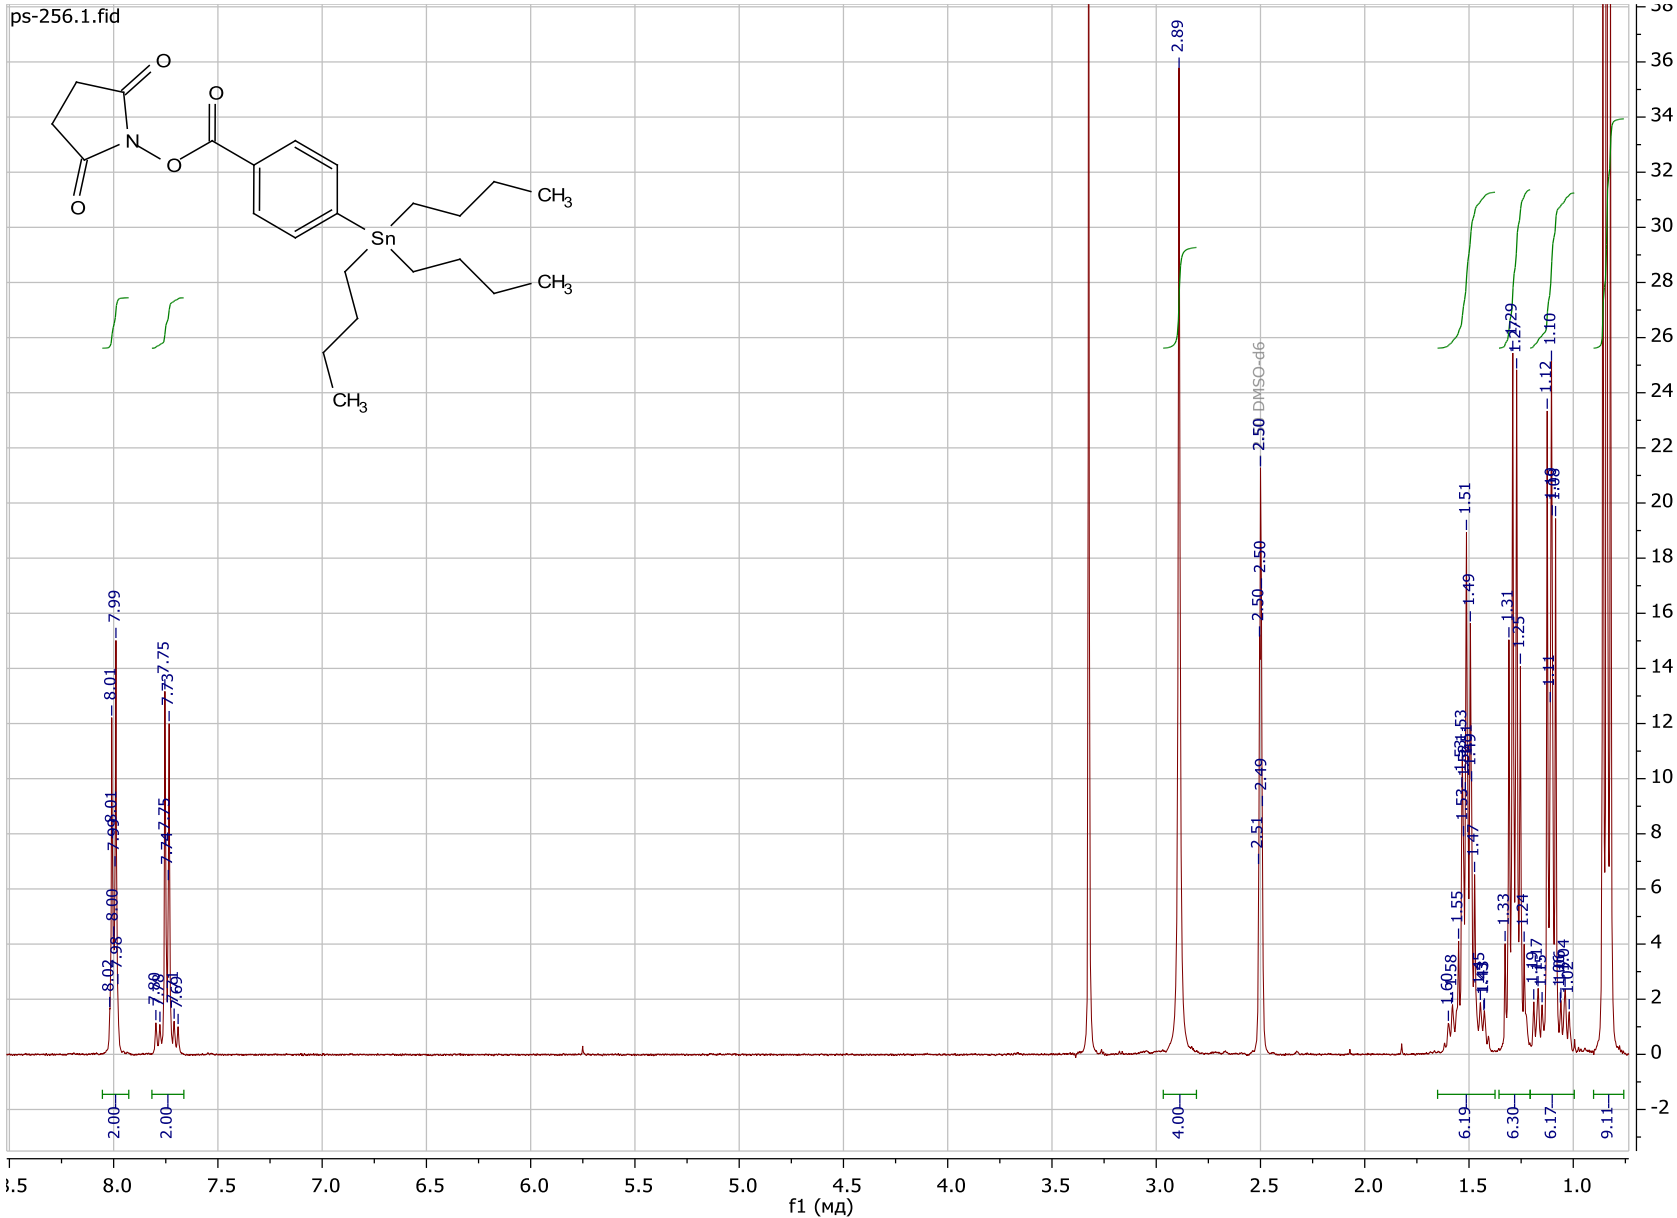

**Figure S27.**  $^1\text{H}$  NMR spectrum of compound **16** in  $\text{DMSO}-d_6$ .

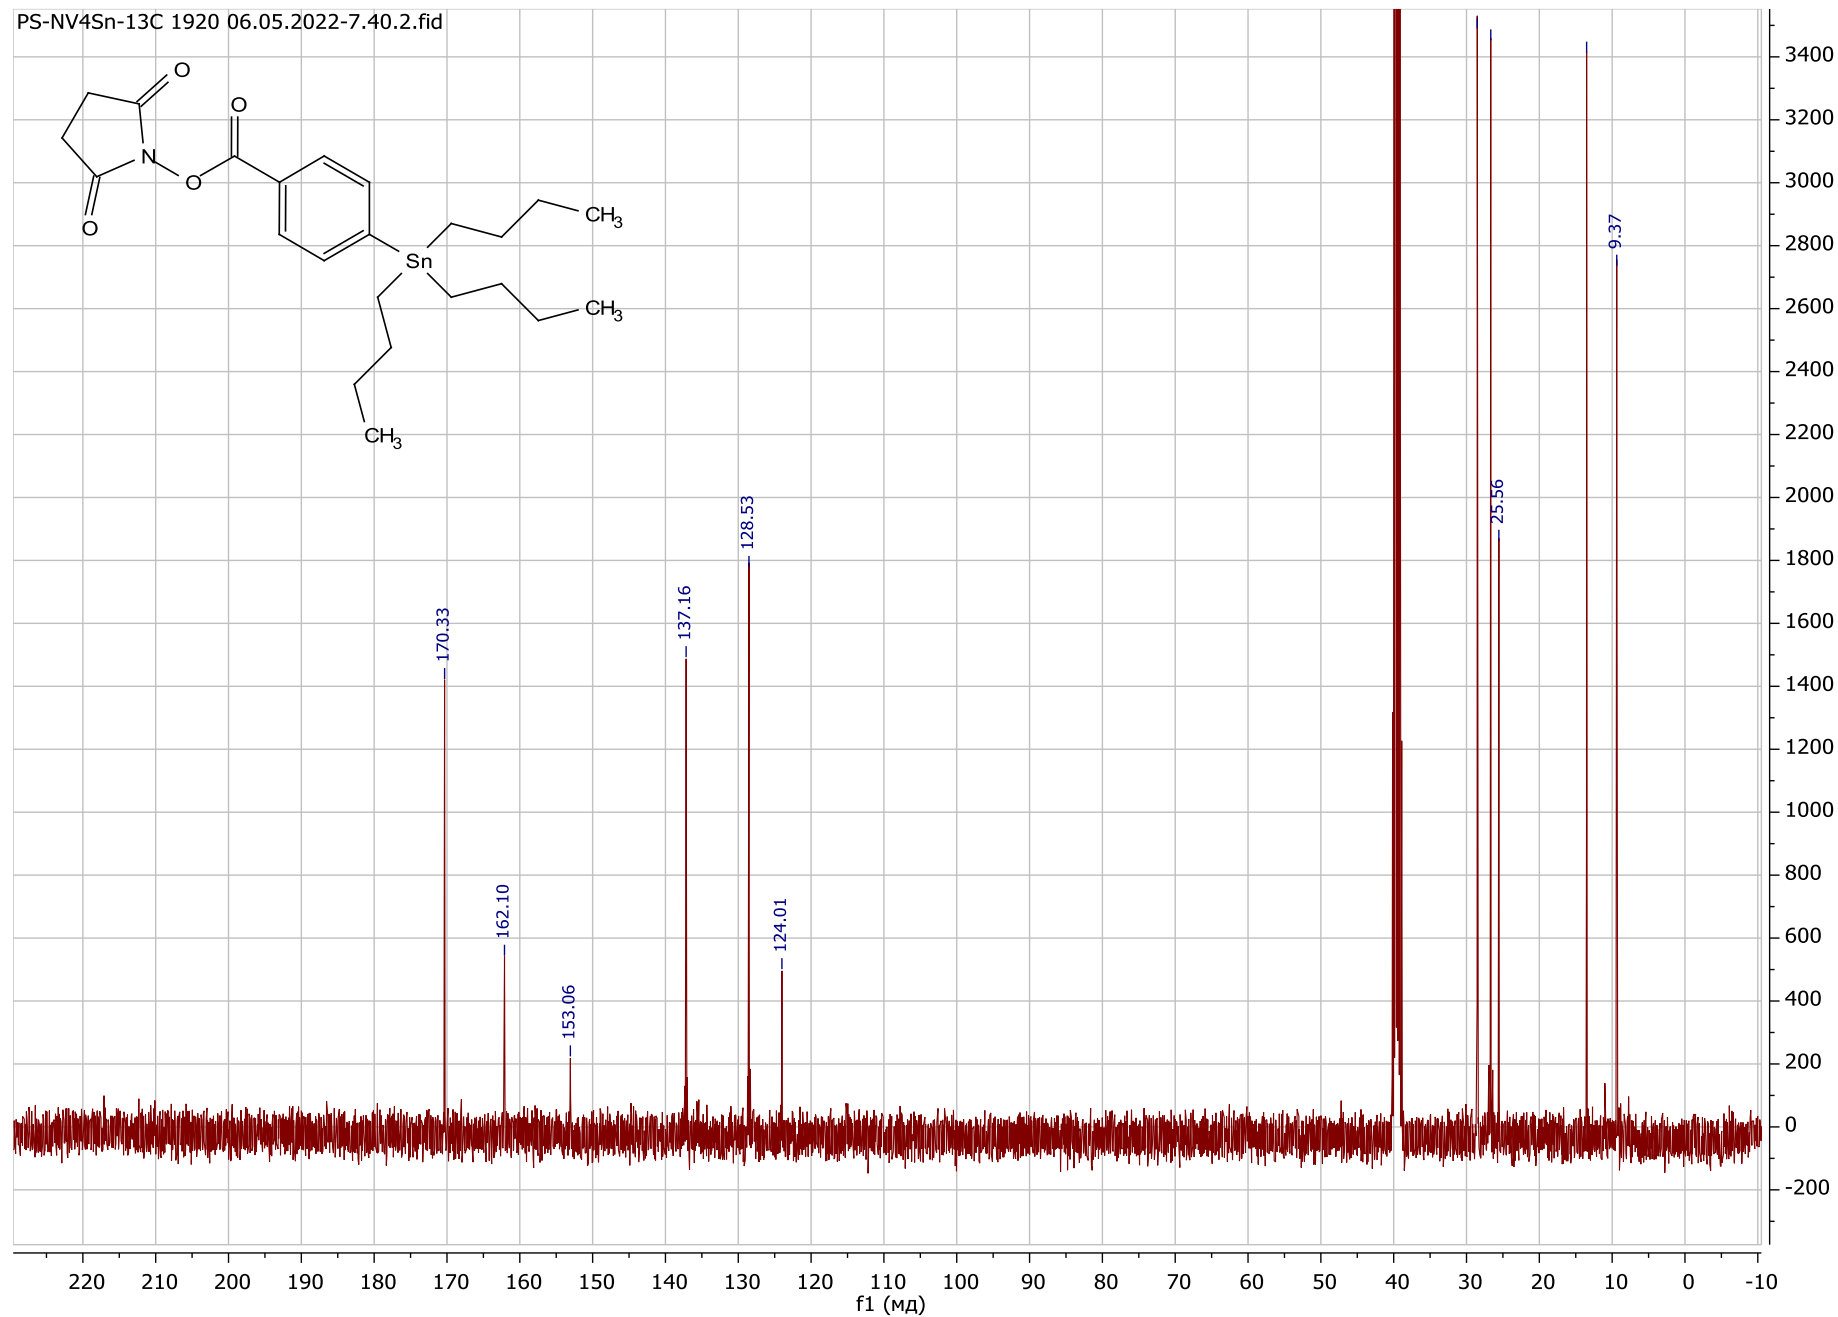

Figure S28.  $^{13}\text{C}$  NMR spectrum of compound № 16 in  $\text{DMSO}-d_6$ .

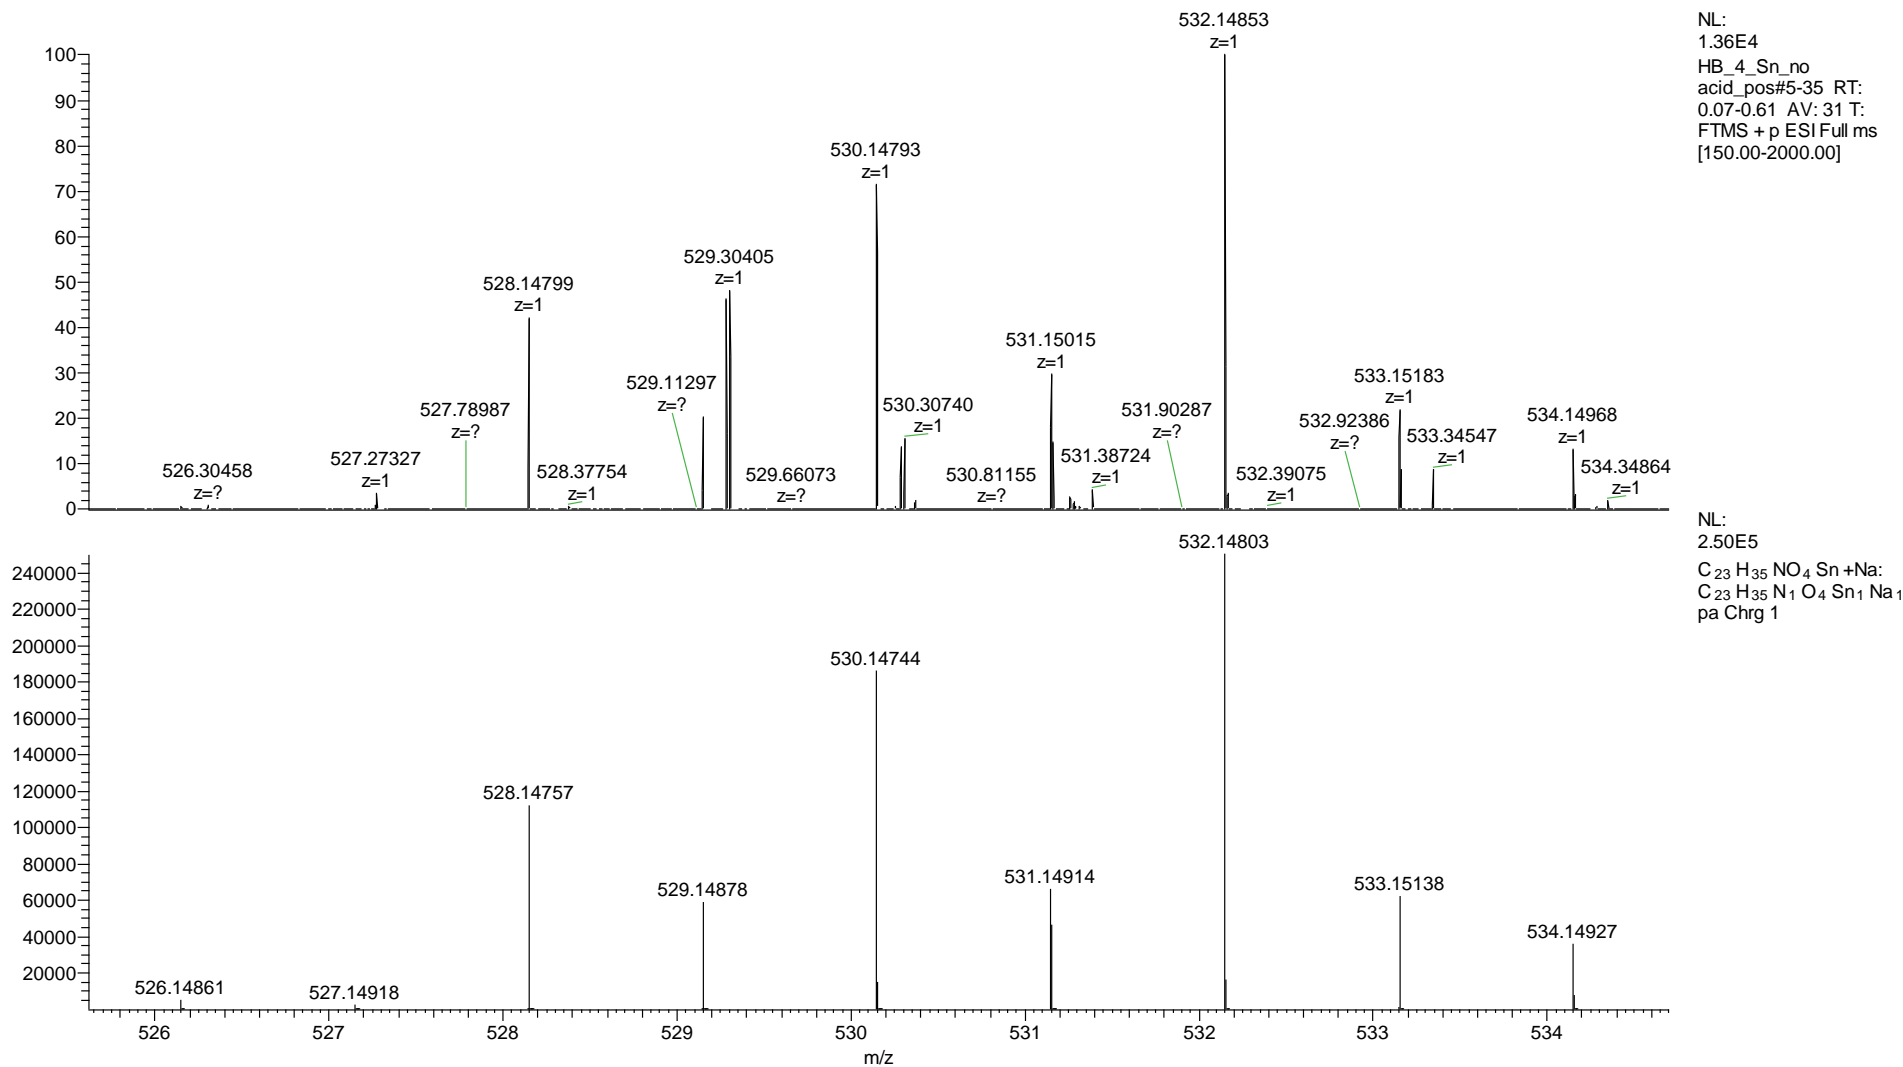

Figure S29. HRMS (m/z, ESI) of compound № 16



# Compound 17

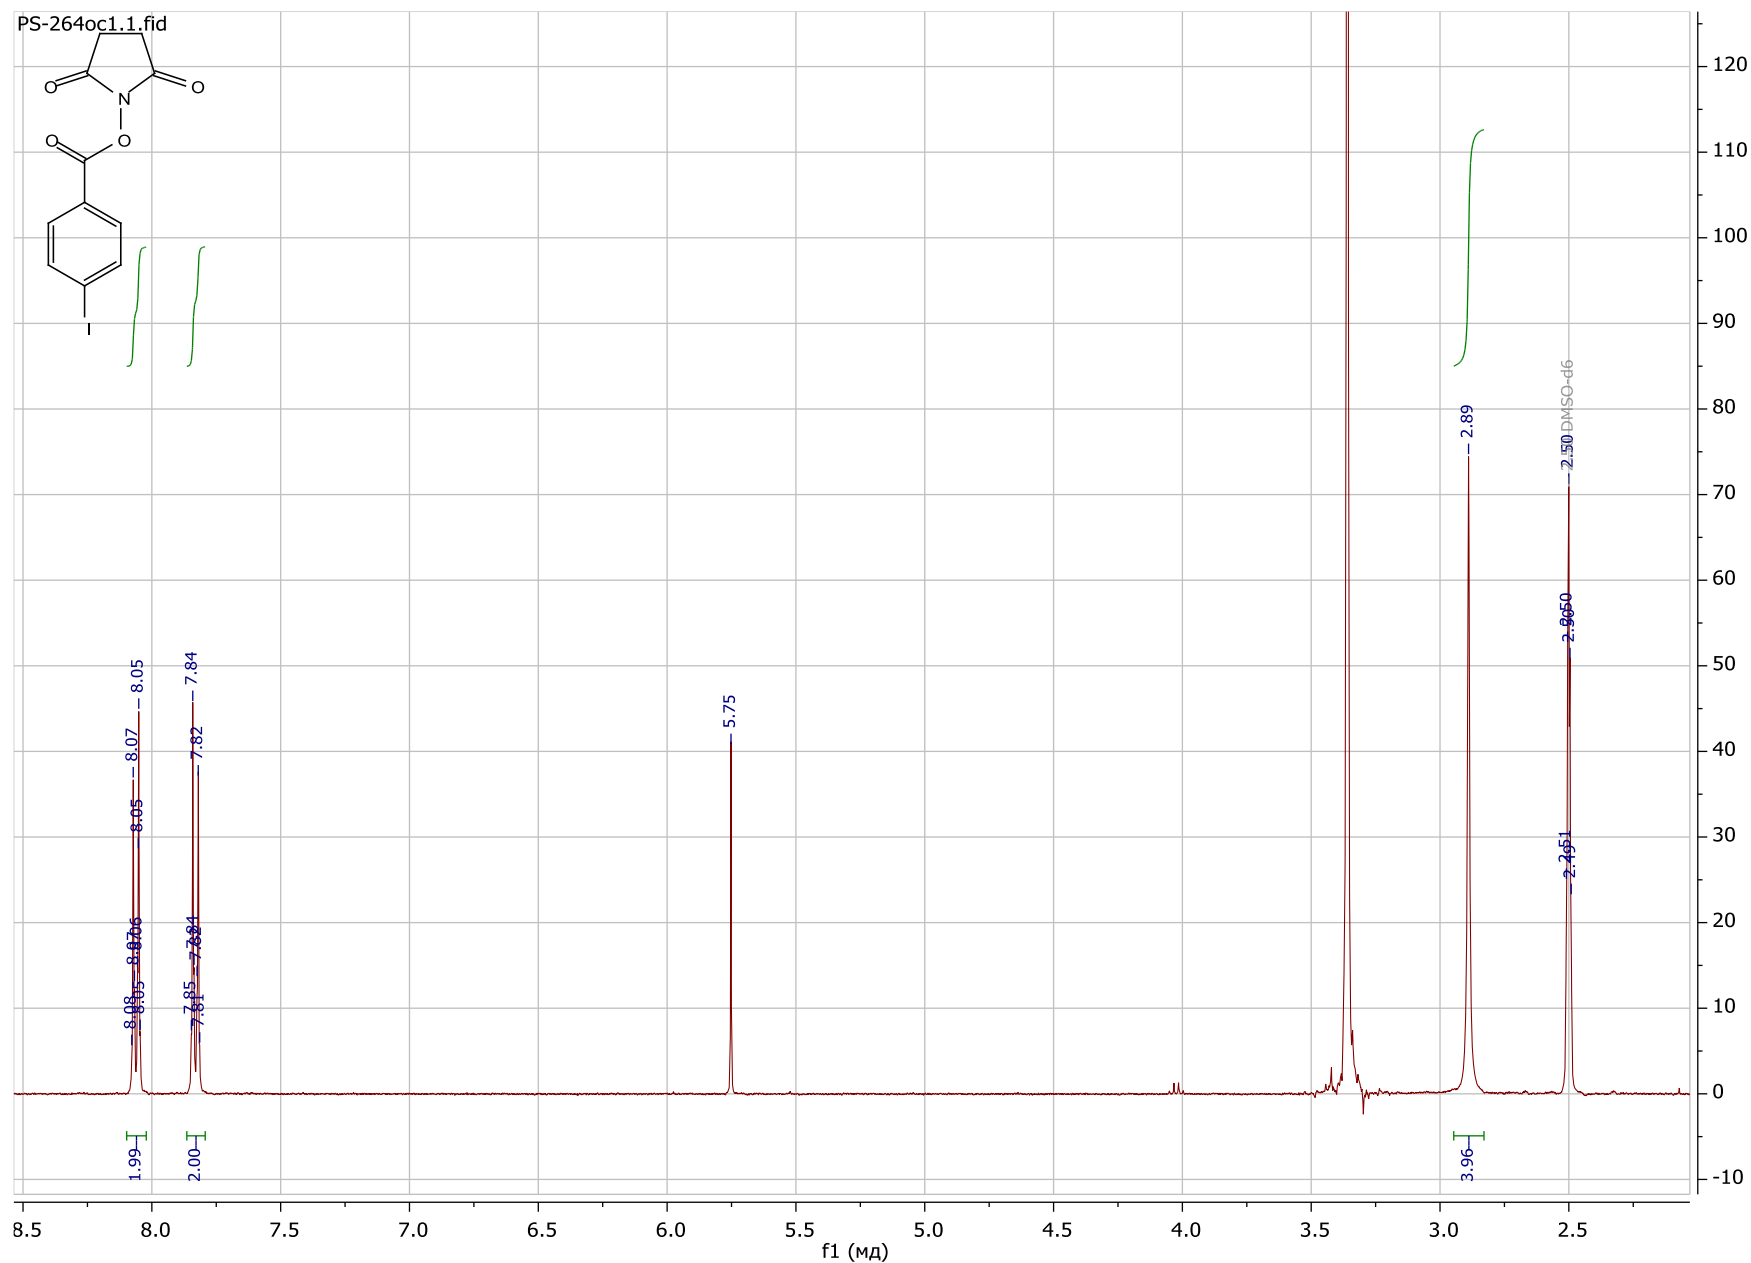

Figure S30. <sup>1</sup>H NMR spectrum of compound № 17 in DMSO-*d*<sub>6</sub>.

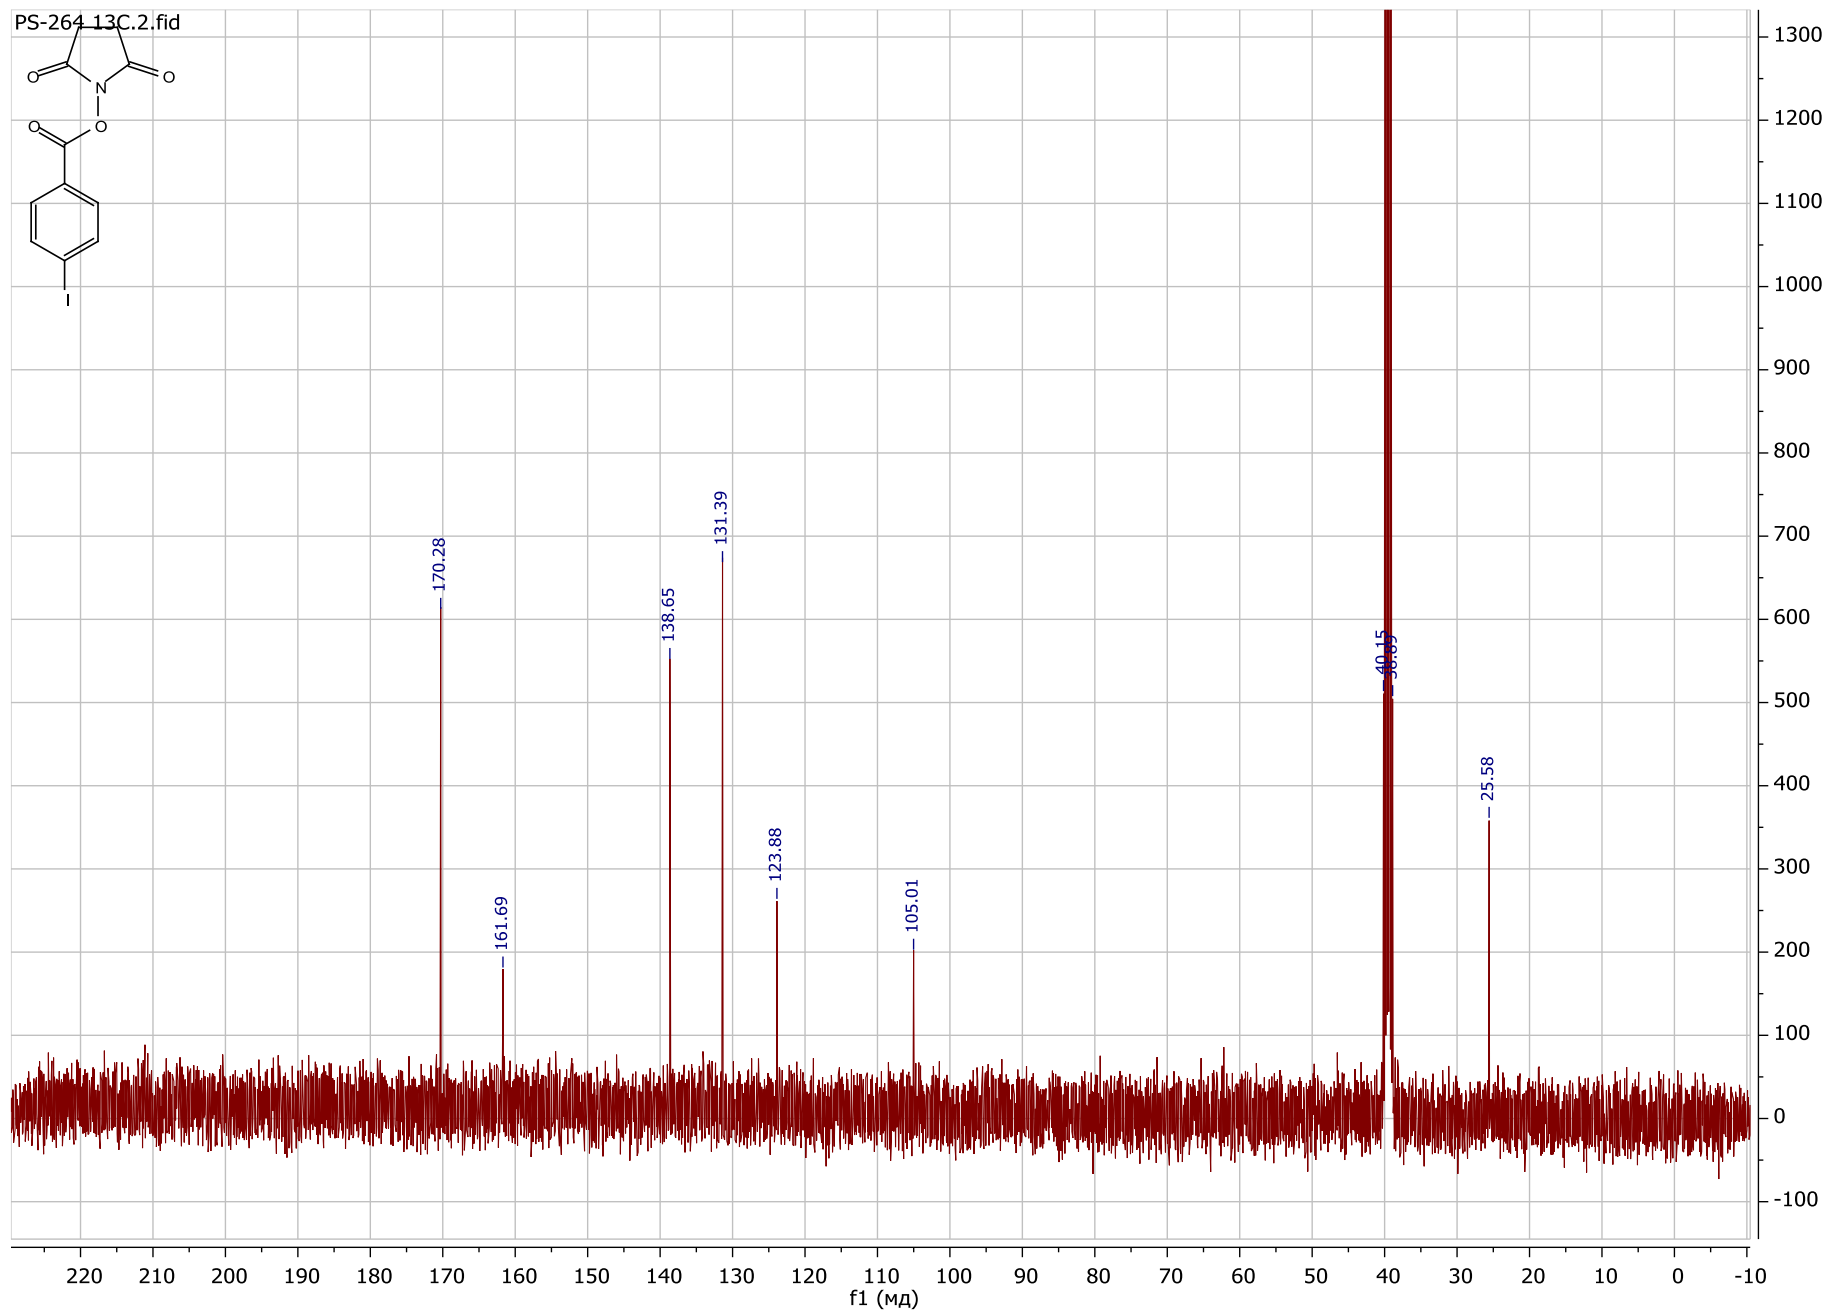

# Compound 18

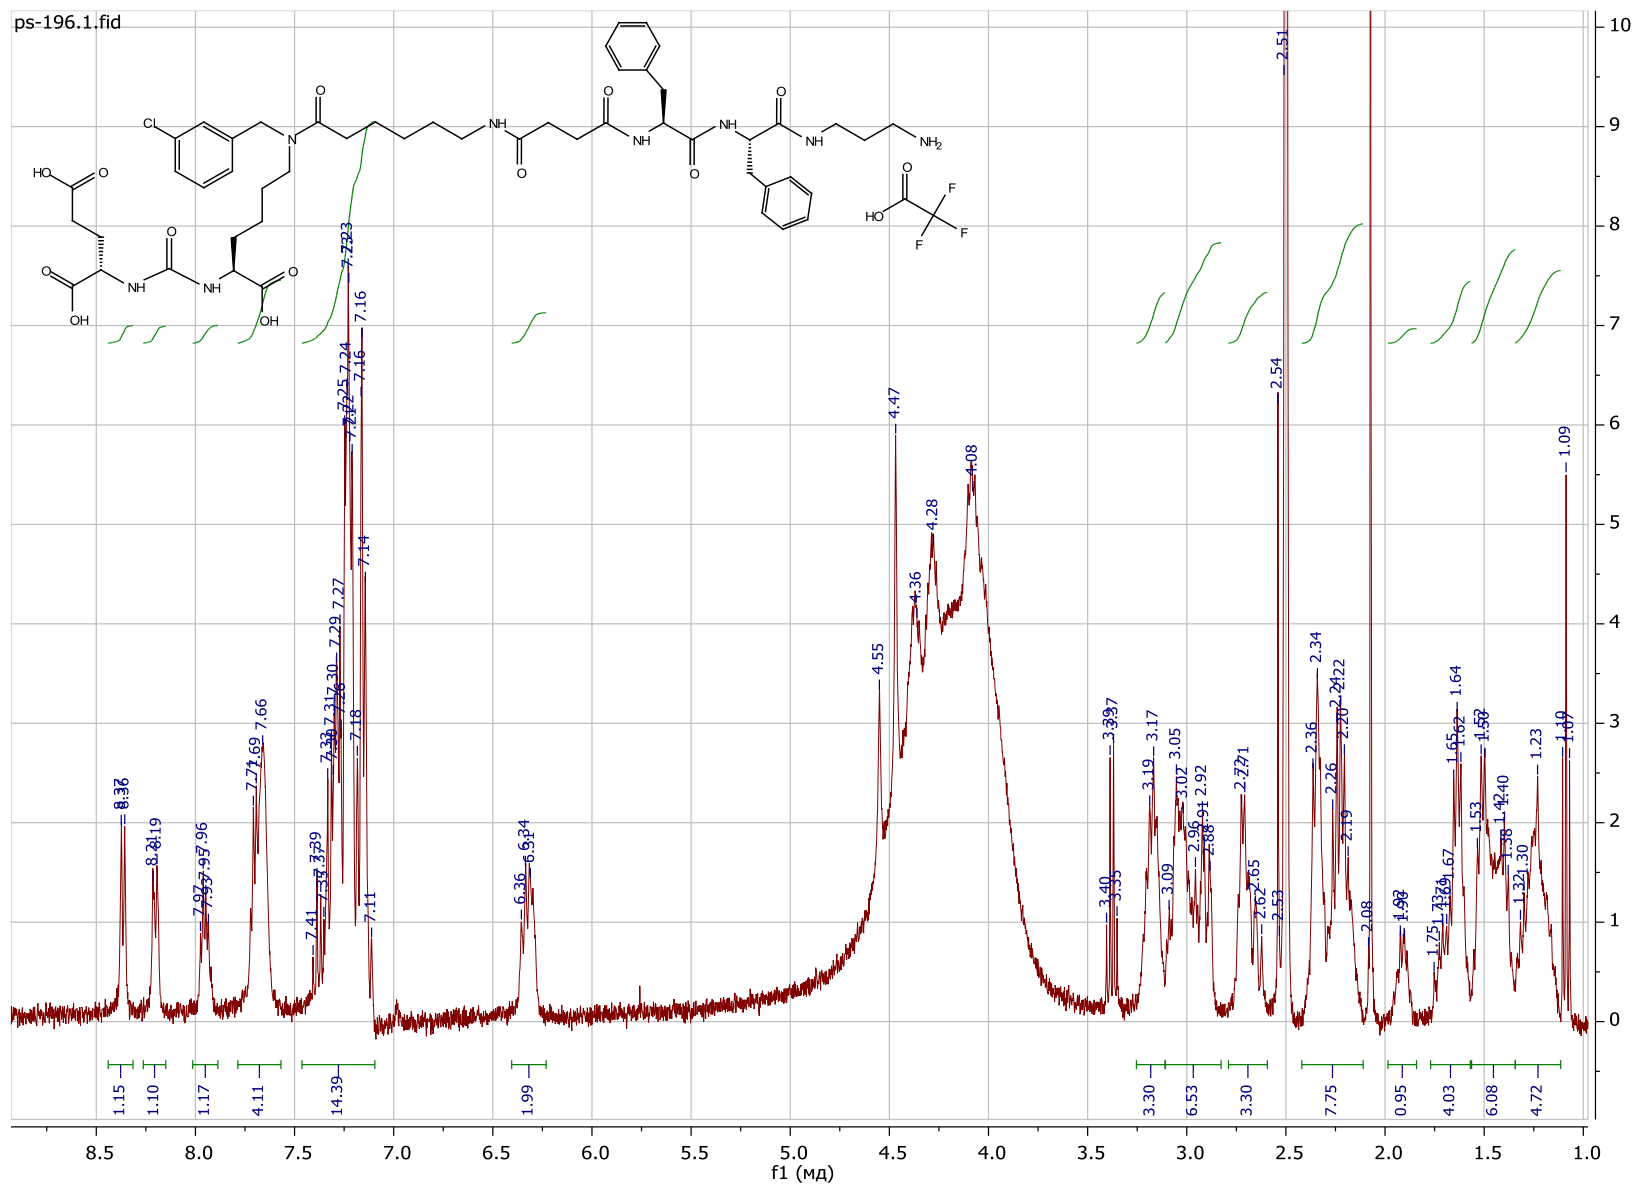

Figure S32. <sup>1</sup>H NMR spectrum of compound № 18 in DMSO-d<sub>6</sub>.

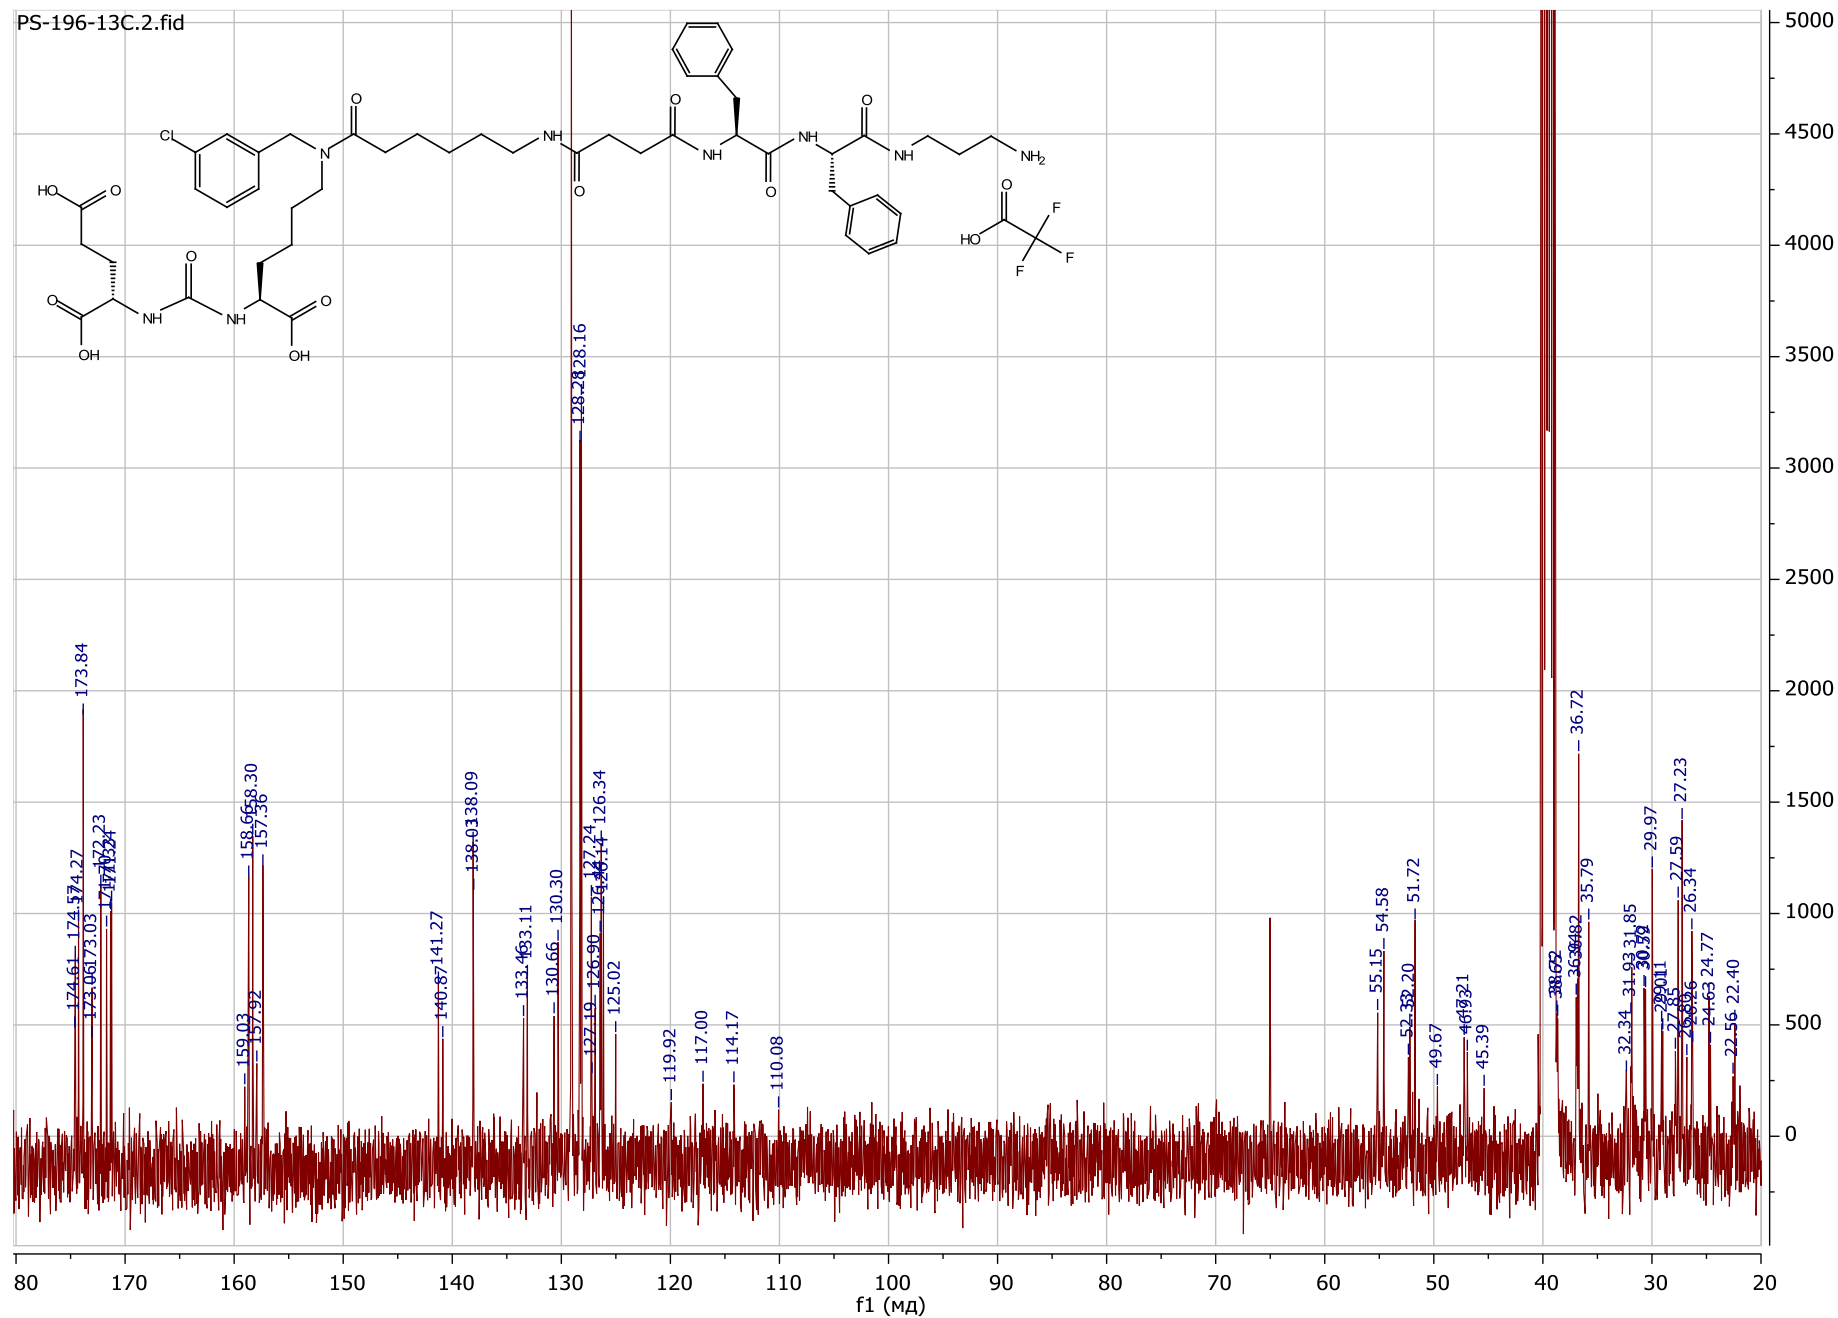

Figure S33. <sup>13</sup>C NMR spectrum of compound № 18 in DMSO-*d*<sub>6</sub>.

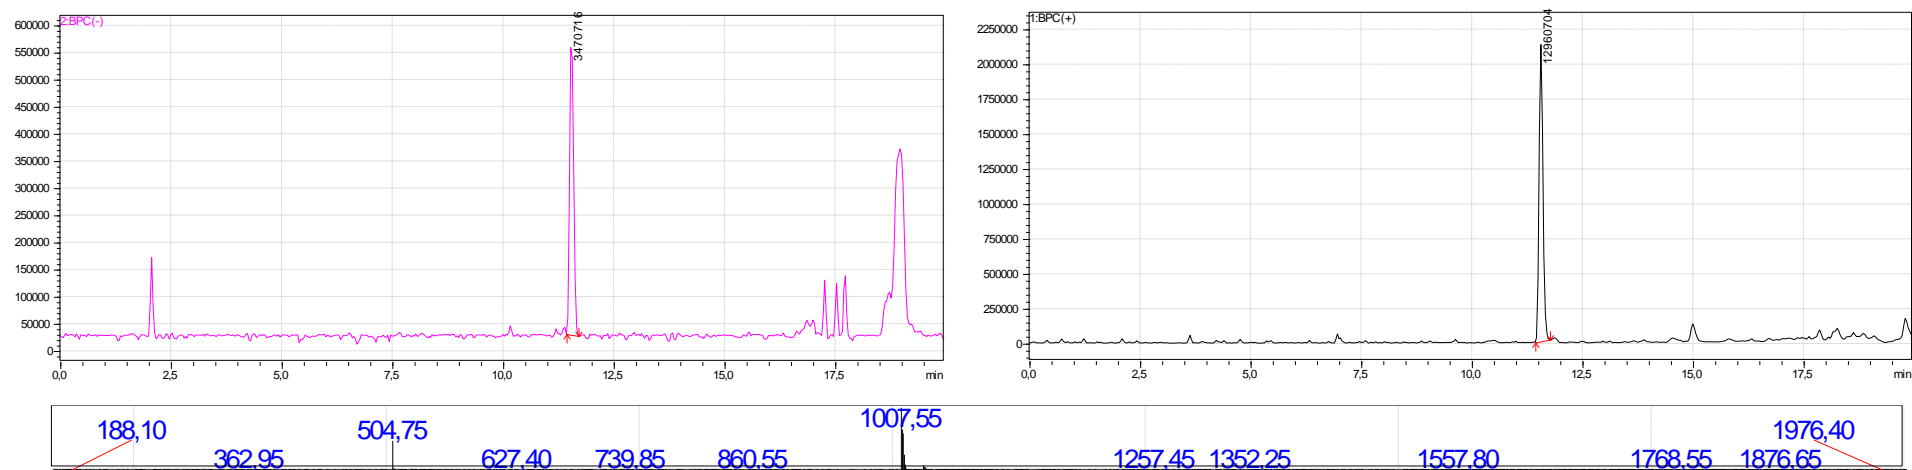

Figure S34. ESI-MS of compound № 18

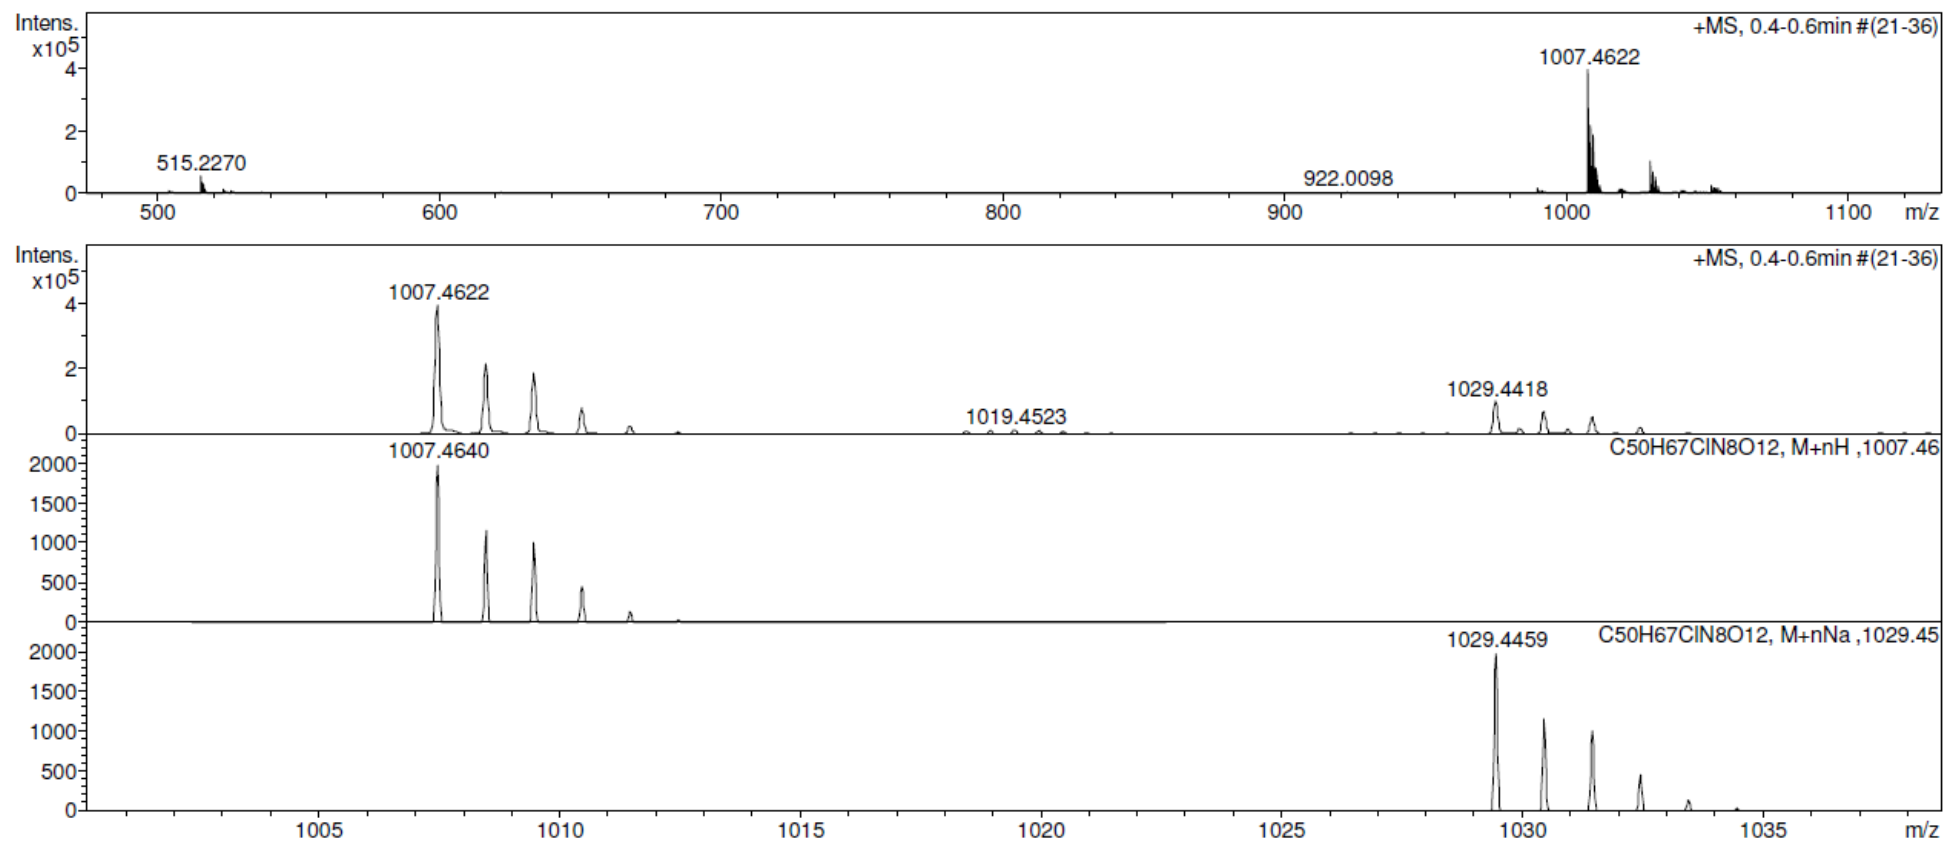

**Figure S35.** HRMS (m/z, ESI) of compound № 18

## Compound 19

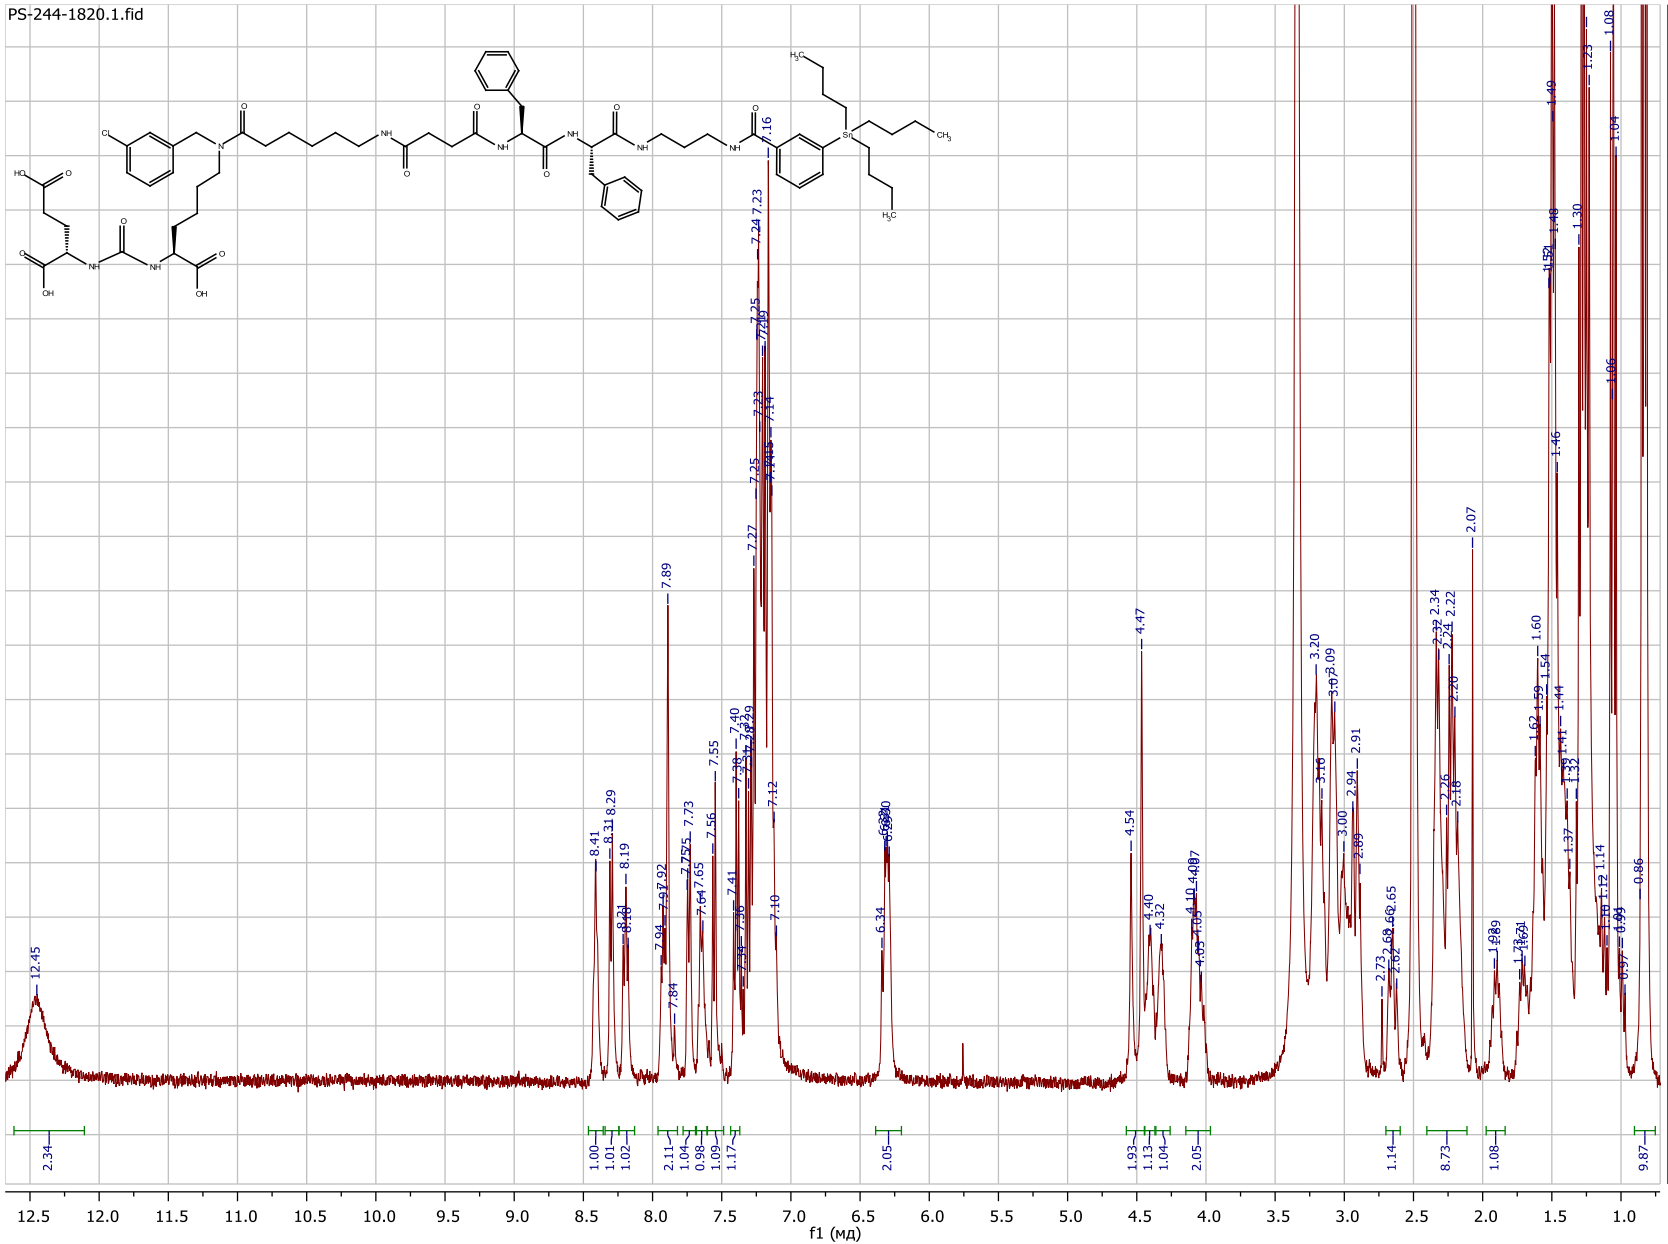

**Figure S36.**  $^1\text{H}$  NMR spectrum of compound **19** in  $\text{DMSO}-d_6$ .

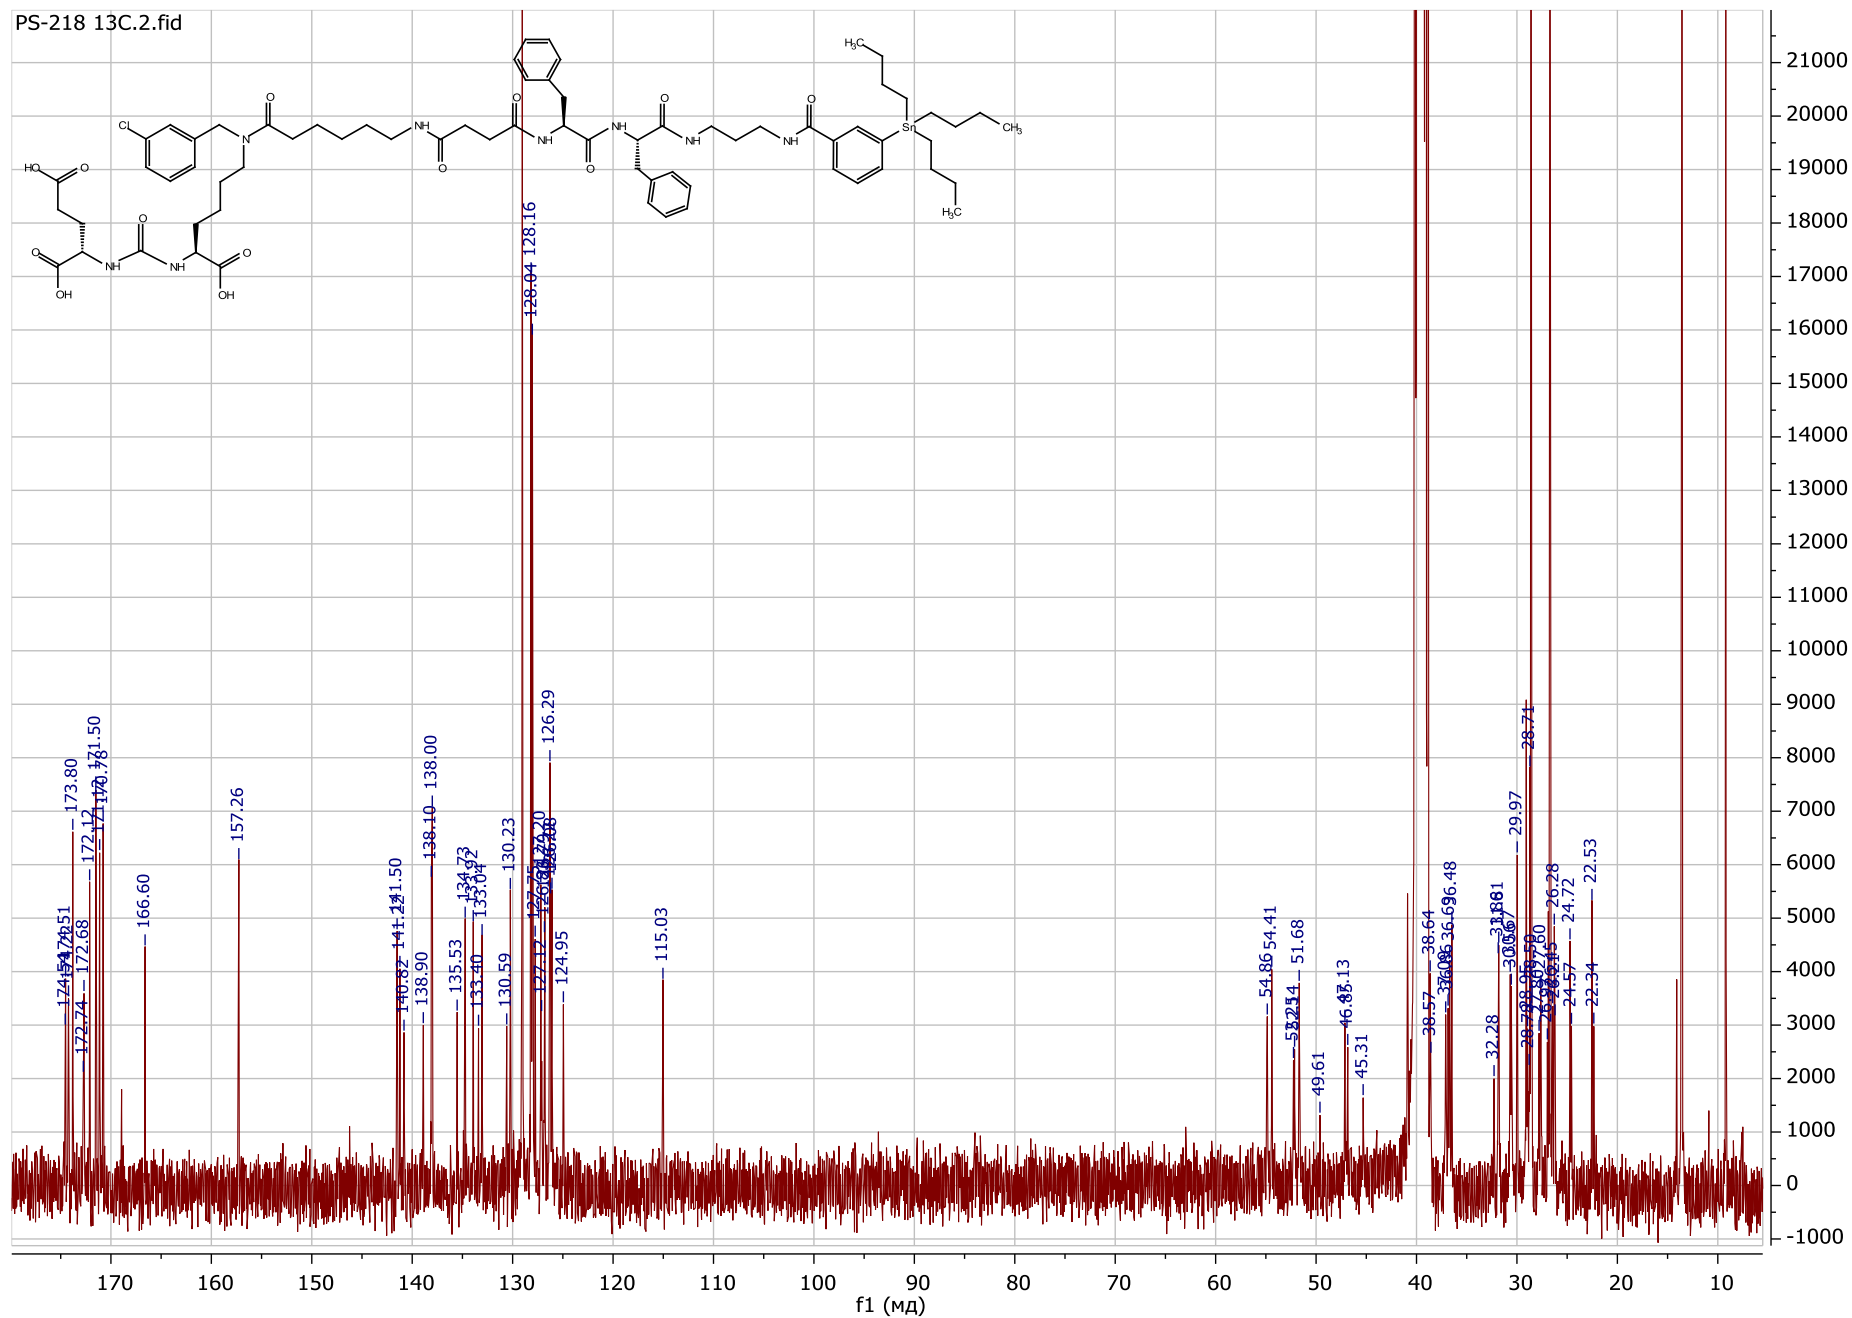

Figure S37.  $^{13}\text{C}$  NMR spectrum of compound № 19 in  $\text{DMSO}-d_6$ .



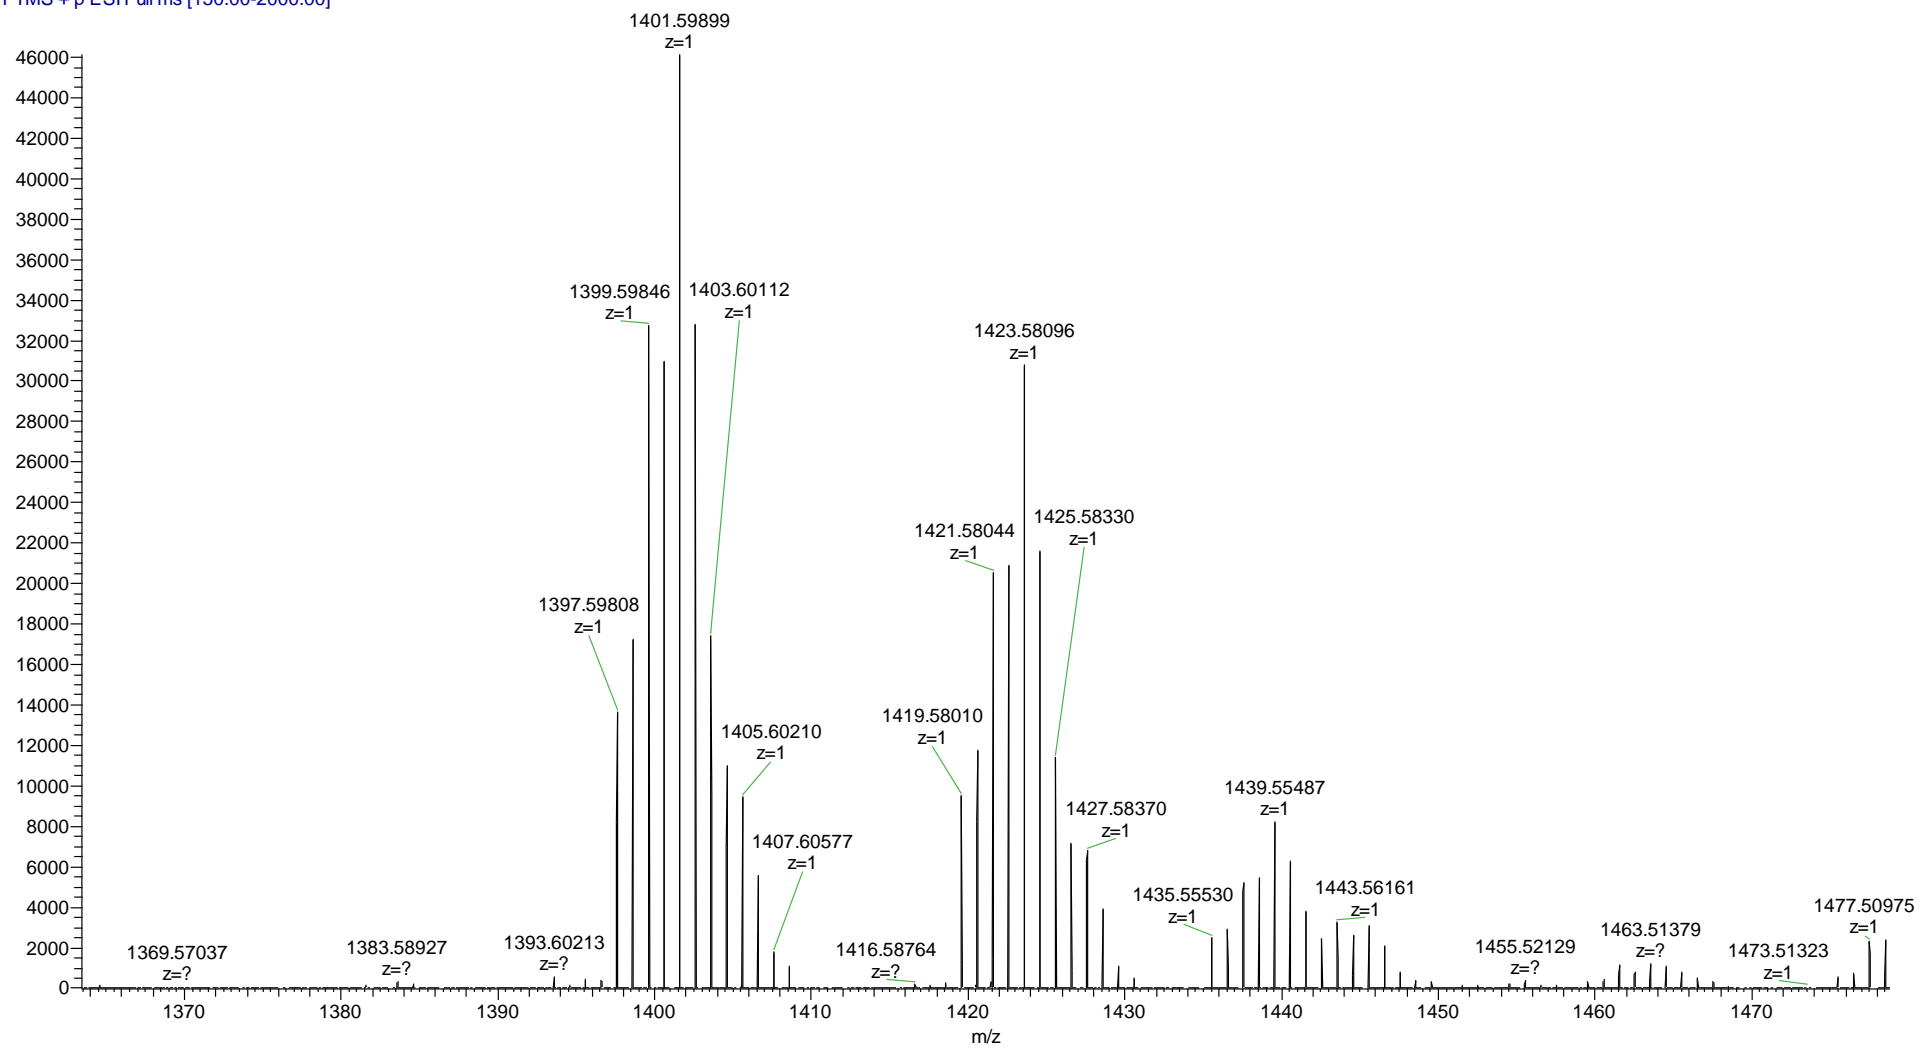

Figure S38. HRMS (m/z, ESI) of compound № 19

# Compound 20

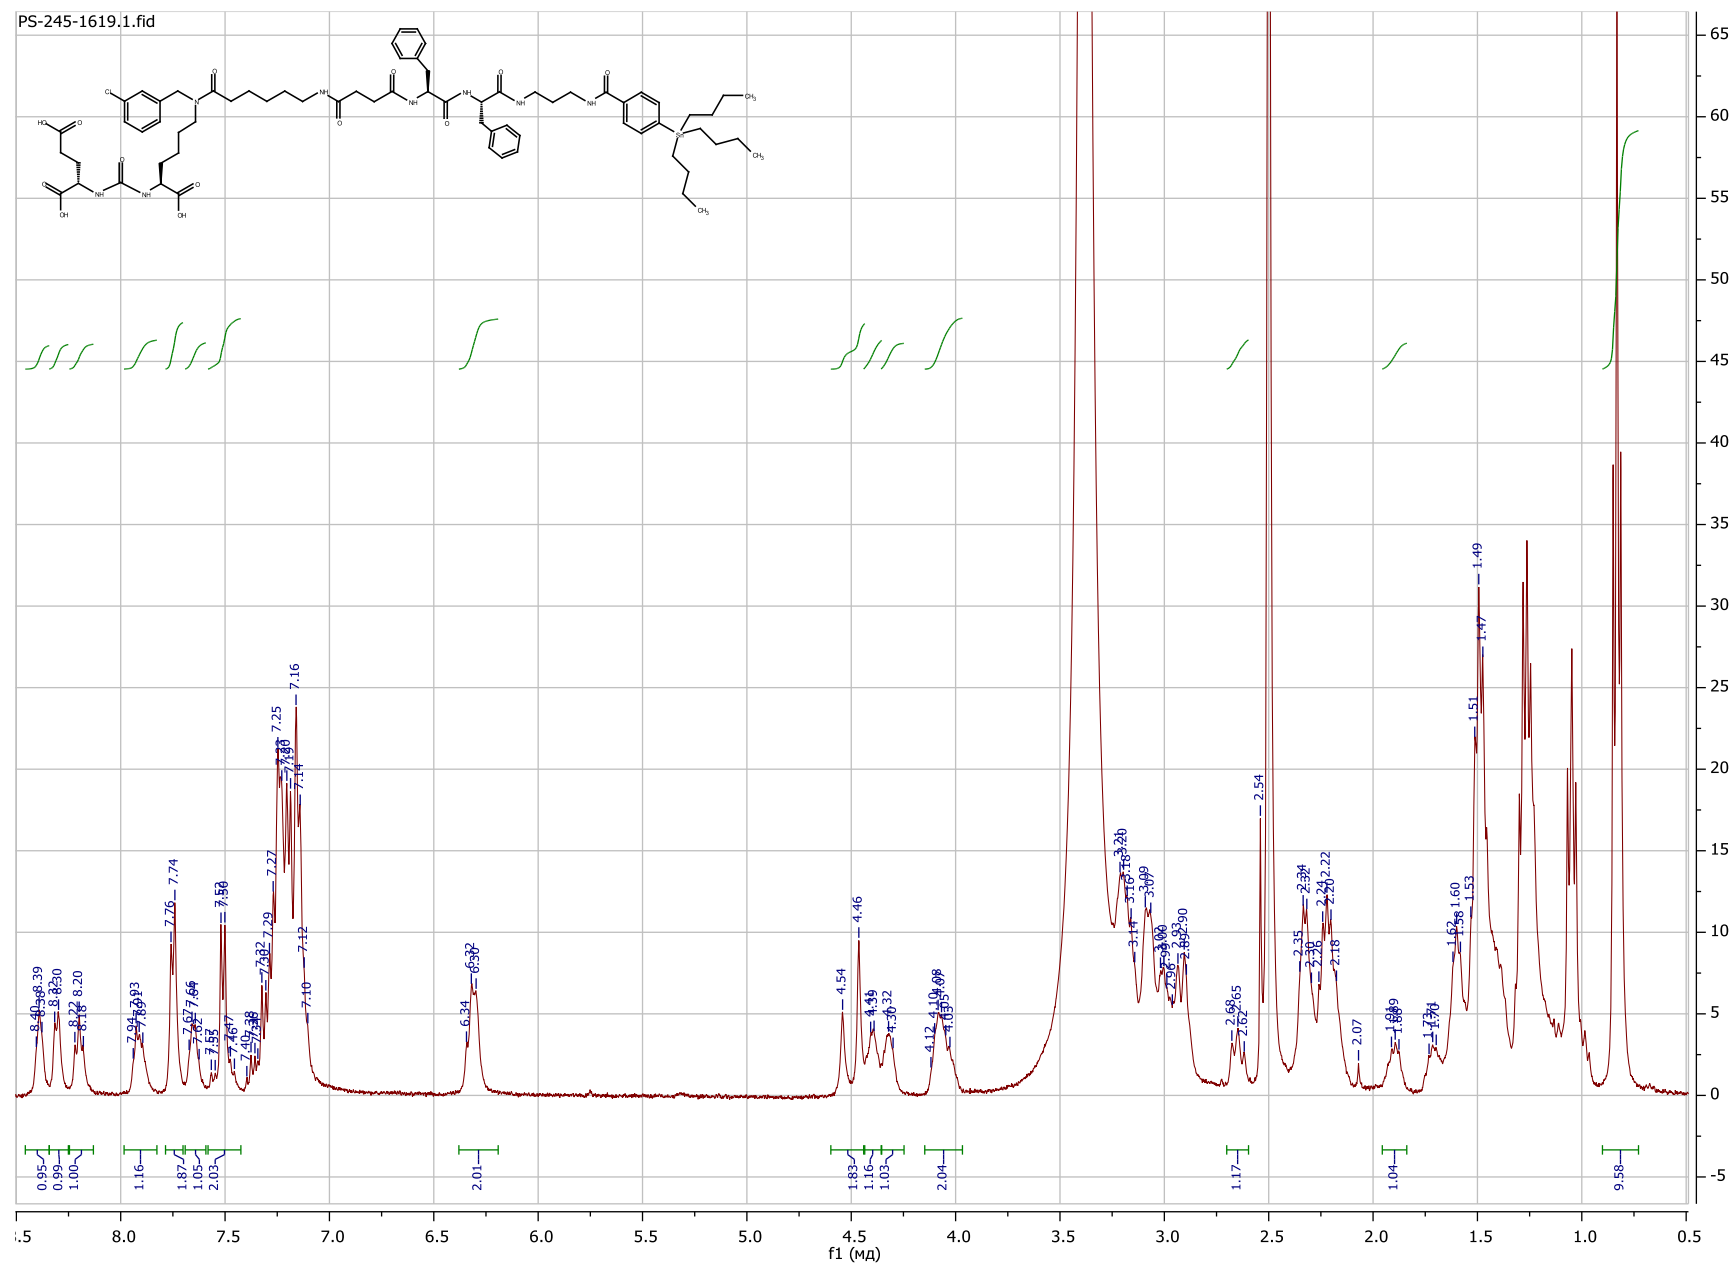

Figure S39. <sup>1</sup>H NMR spectrum of compound No 20 in DMSO-*d*<sub>6</sub>.



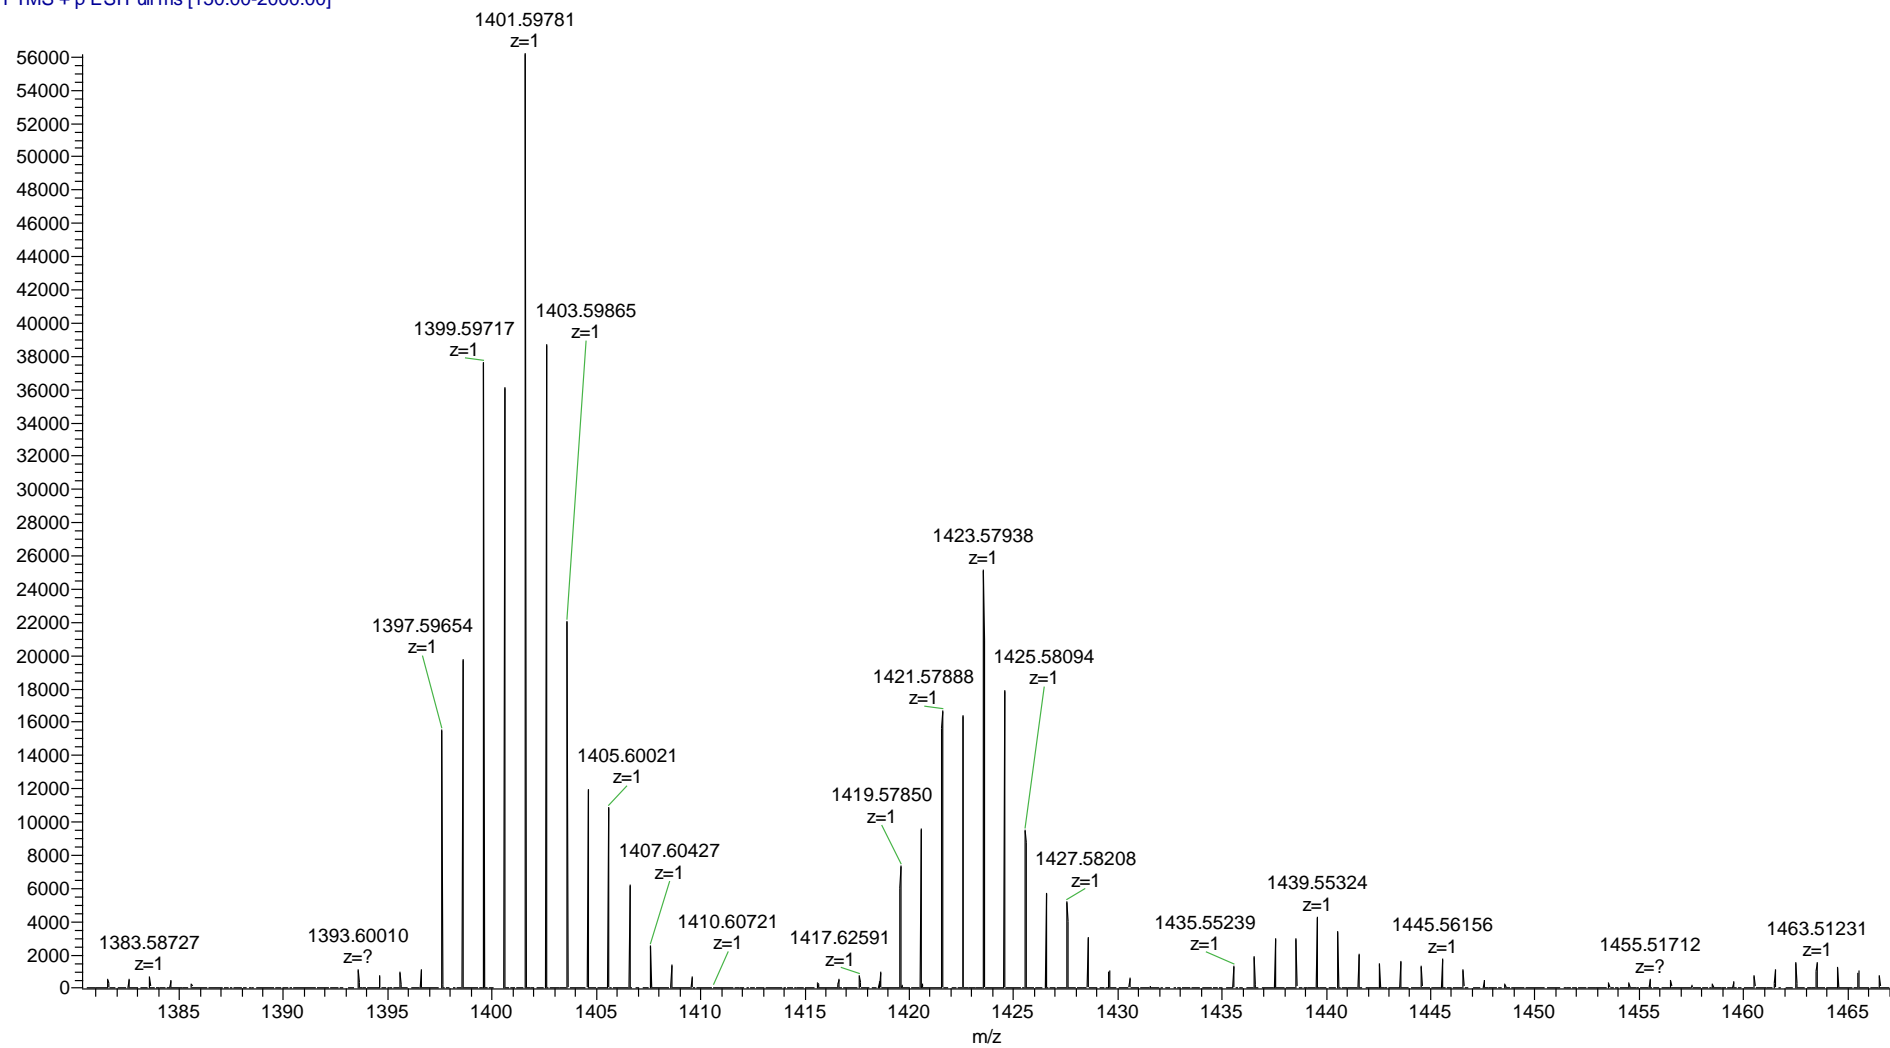

Figure S41. HRMS ( $m/z$ , ESI) of compound № 20

# Compound 21

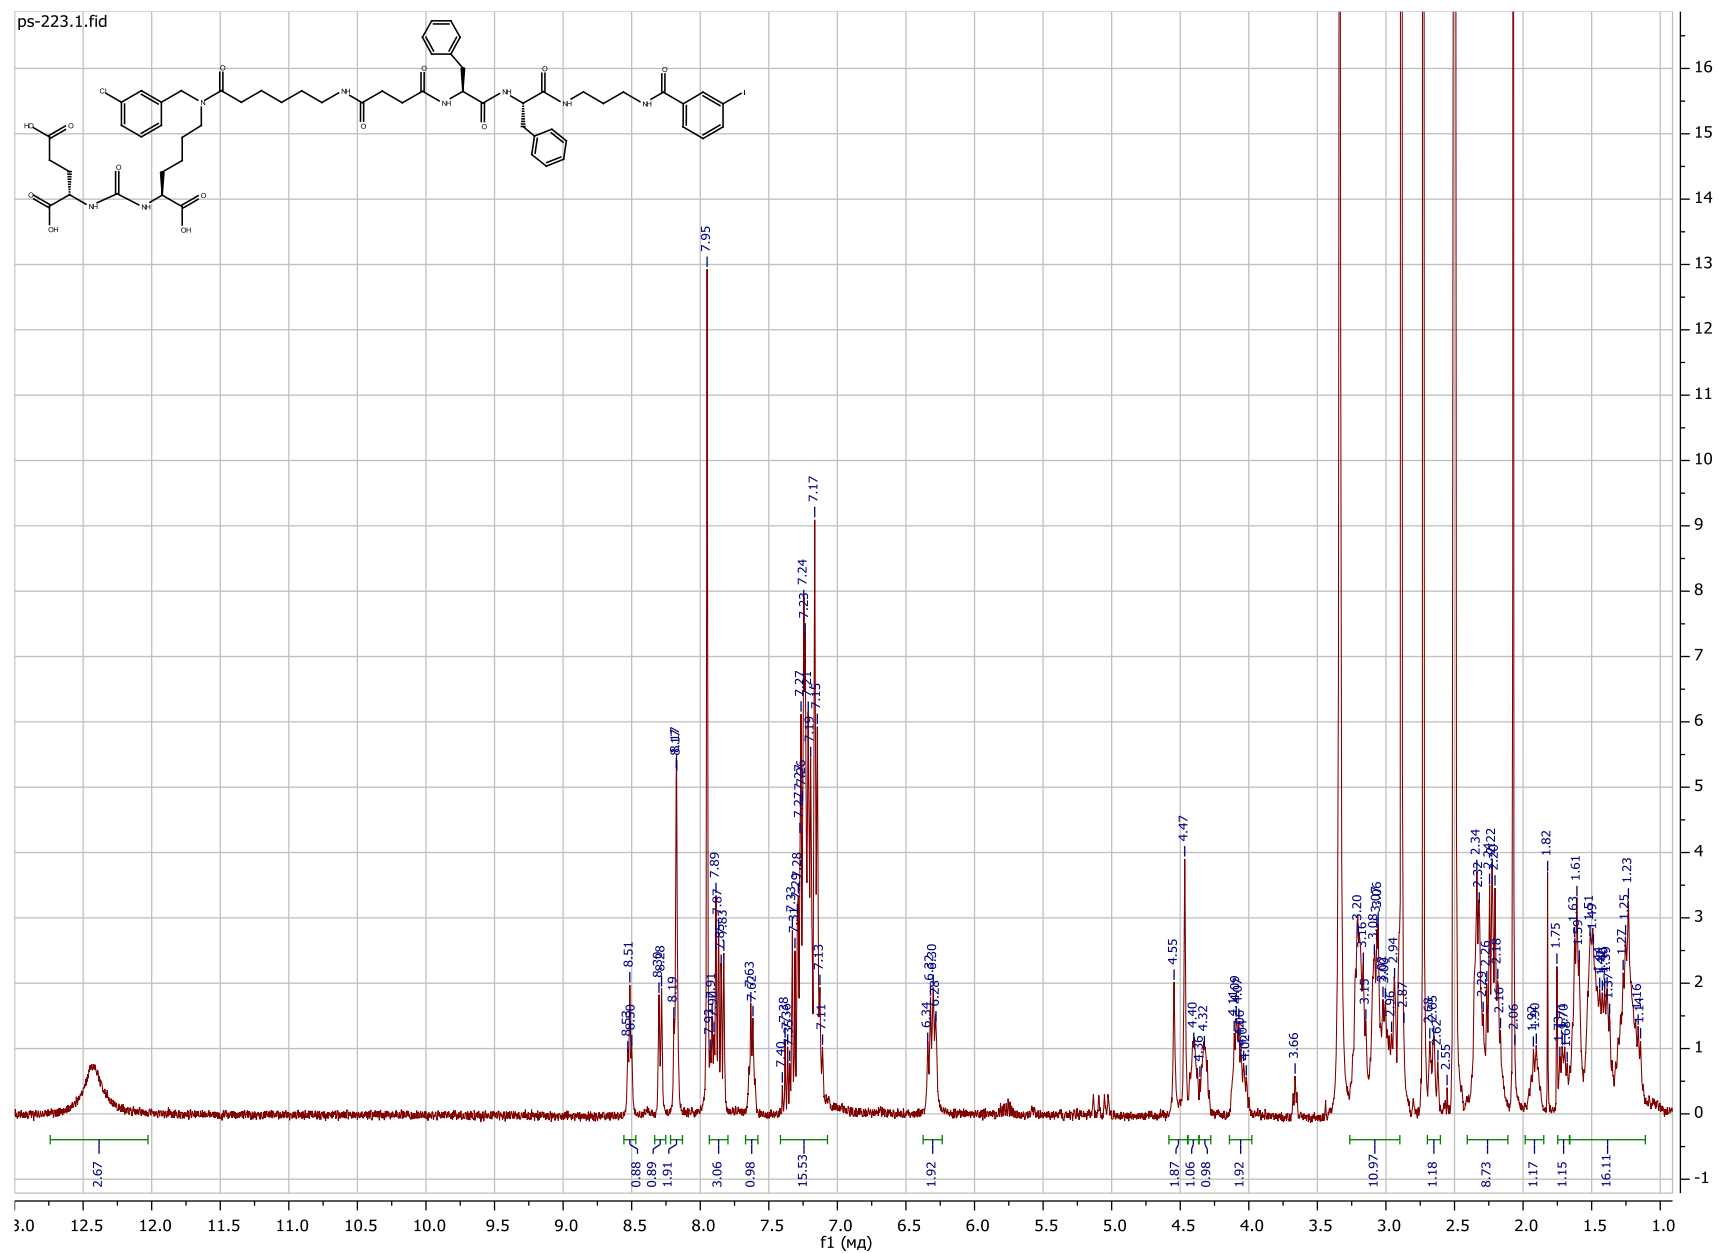

Figure S42. <sup>1</sup>H NMR spectrum of compound № 21 in DMSO-*d*<sub>6</sub>.

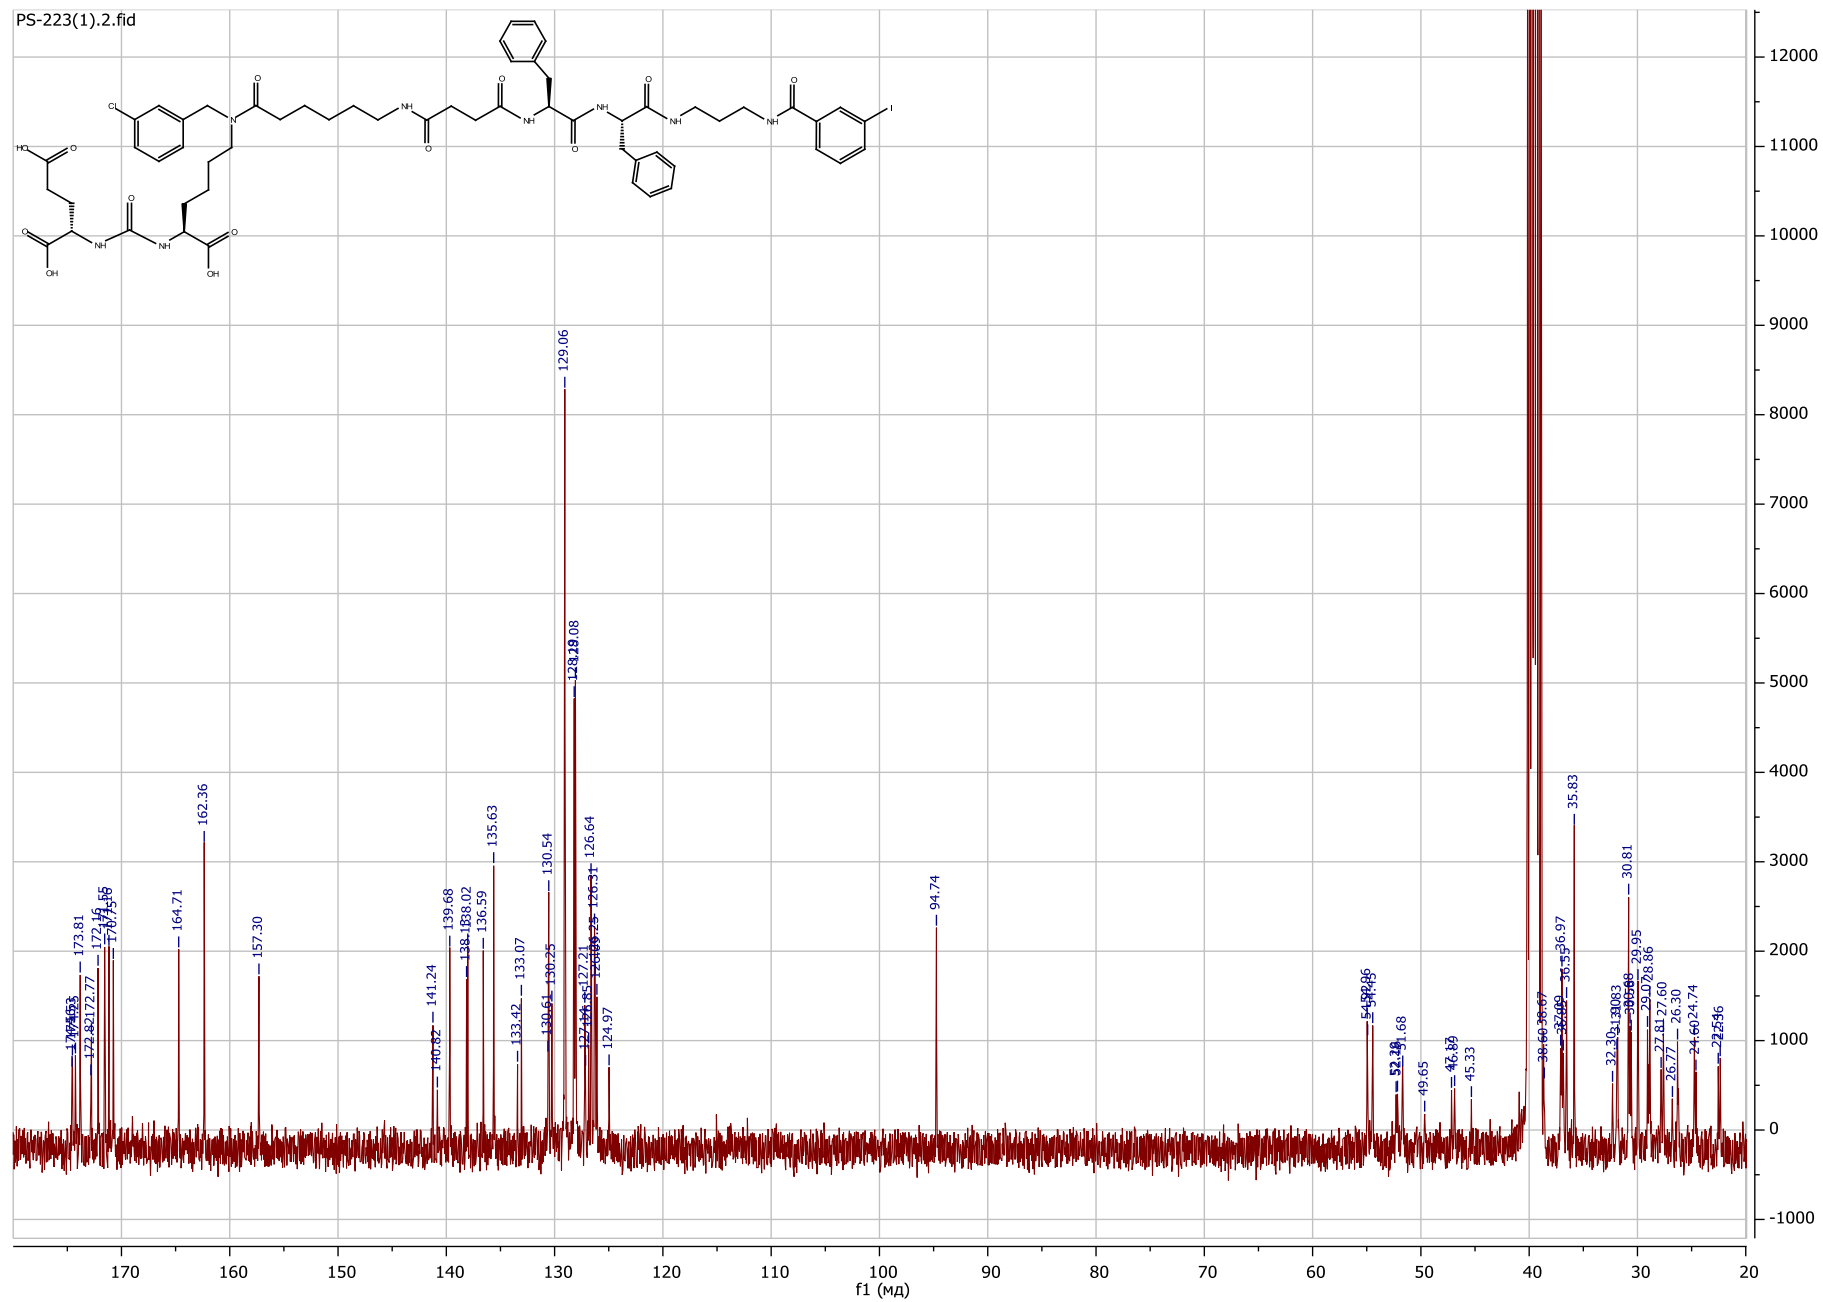

Figure S43. <sup>13</sup>C NMR spectrum of compound № 21 in DMSO-*d*<sub>6</sub>.

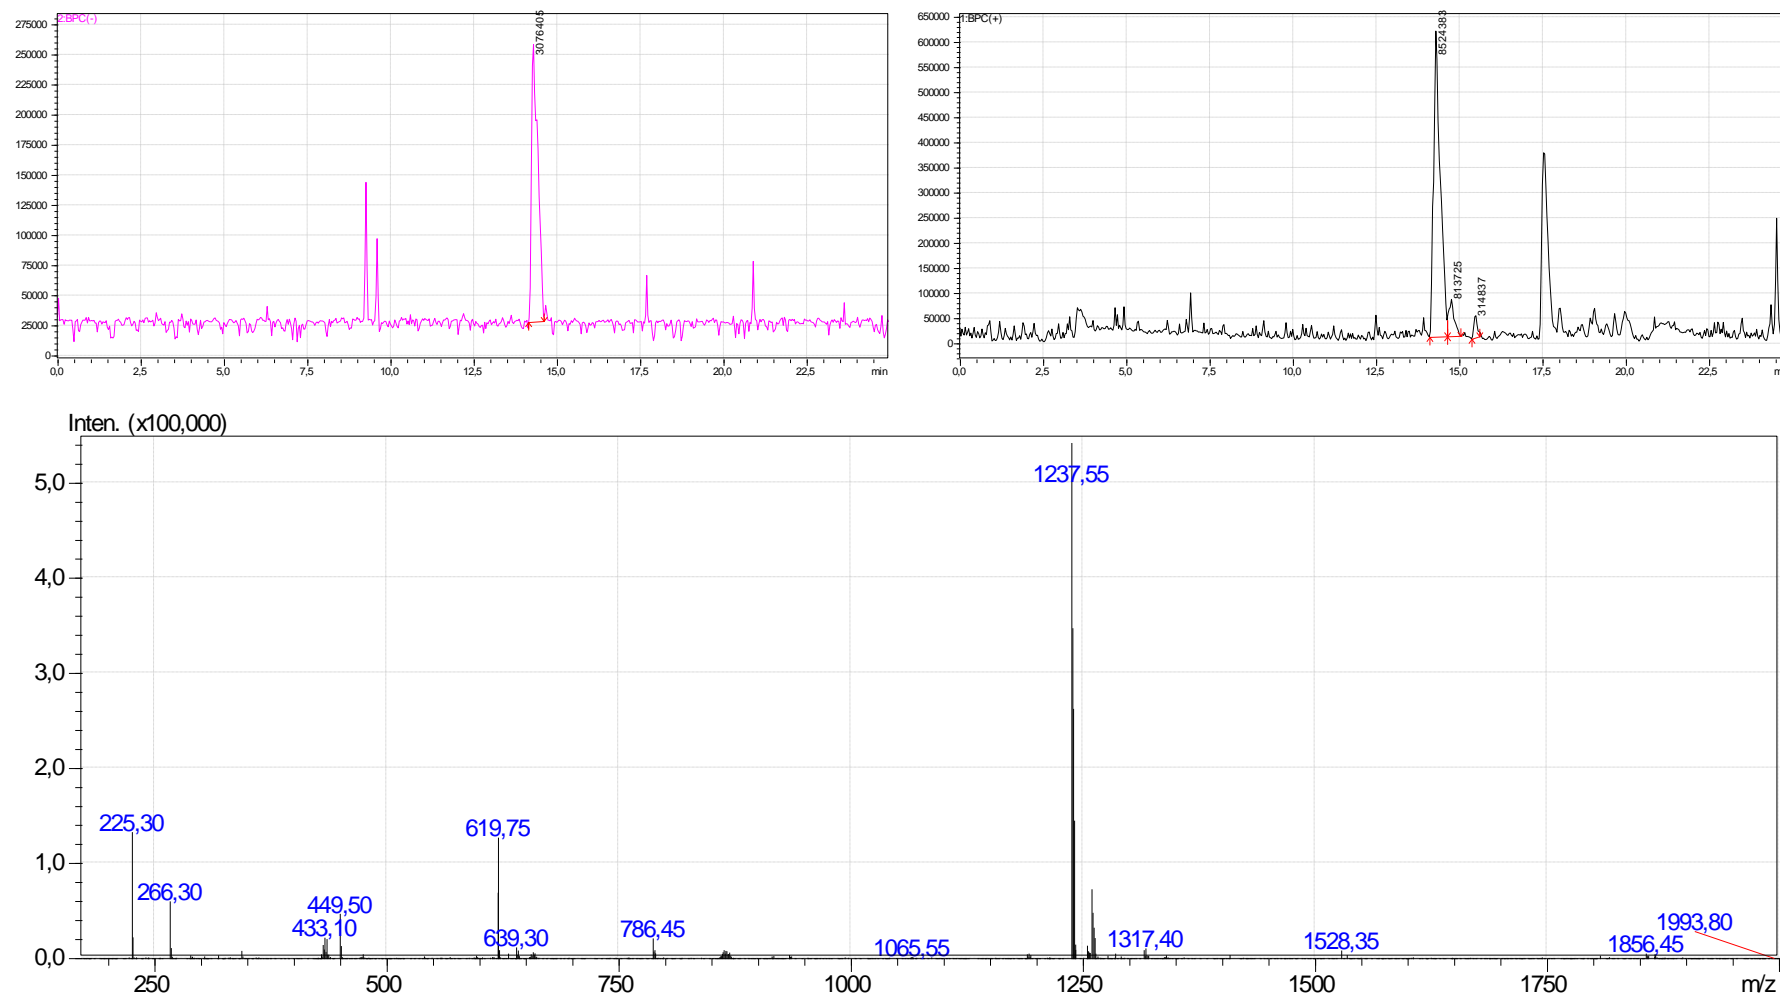

Figure S44. ESI-MS of compound № 21





# Compound 22

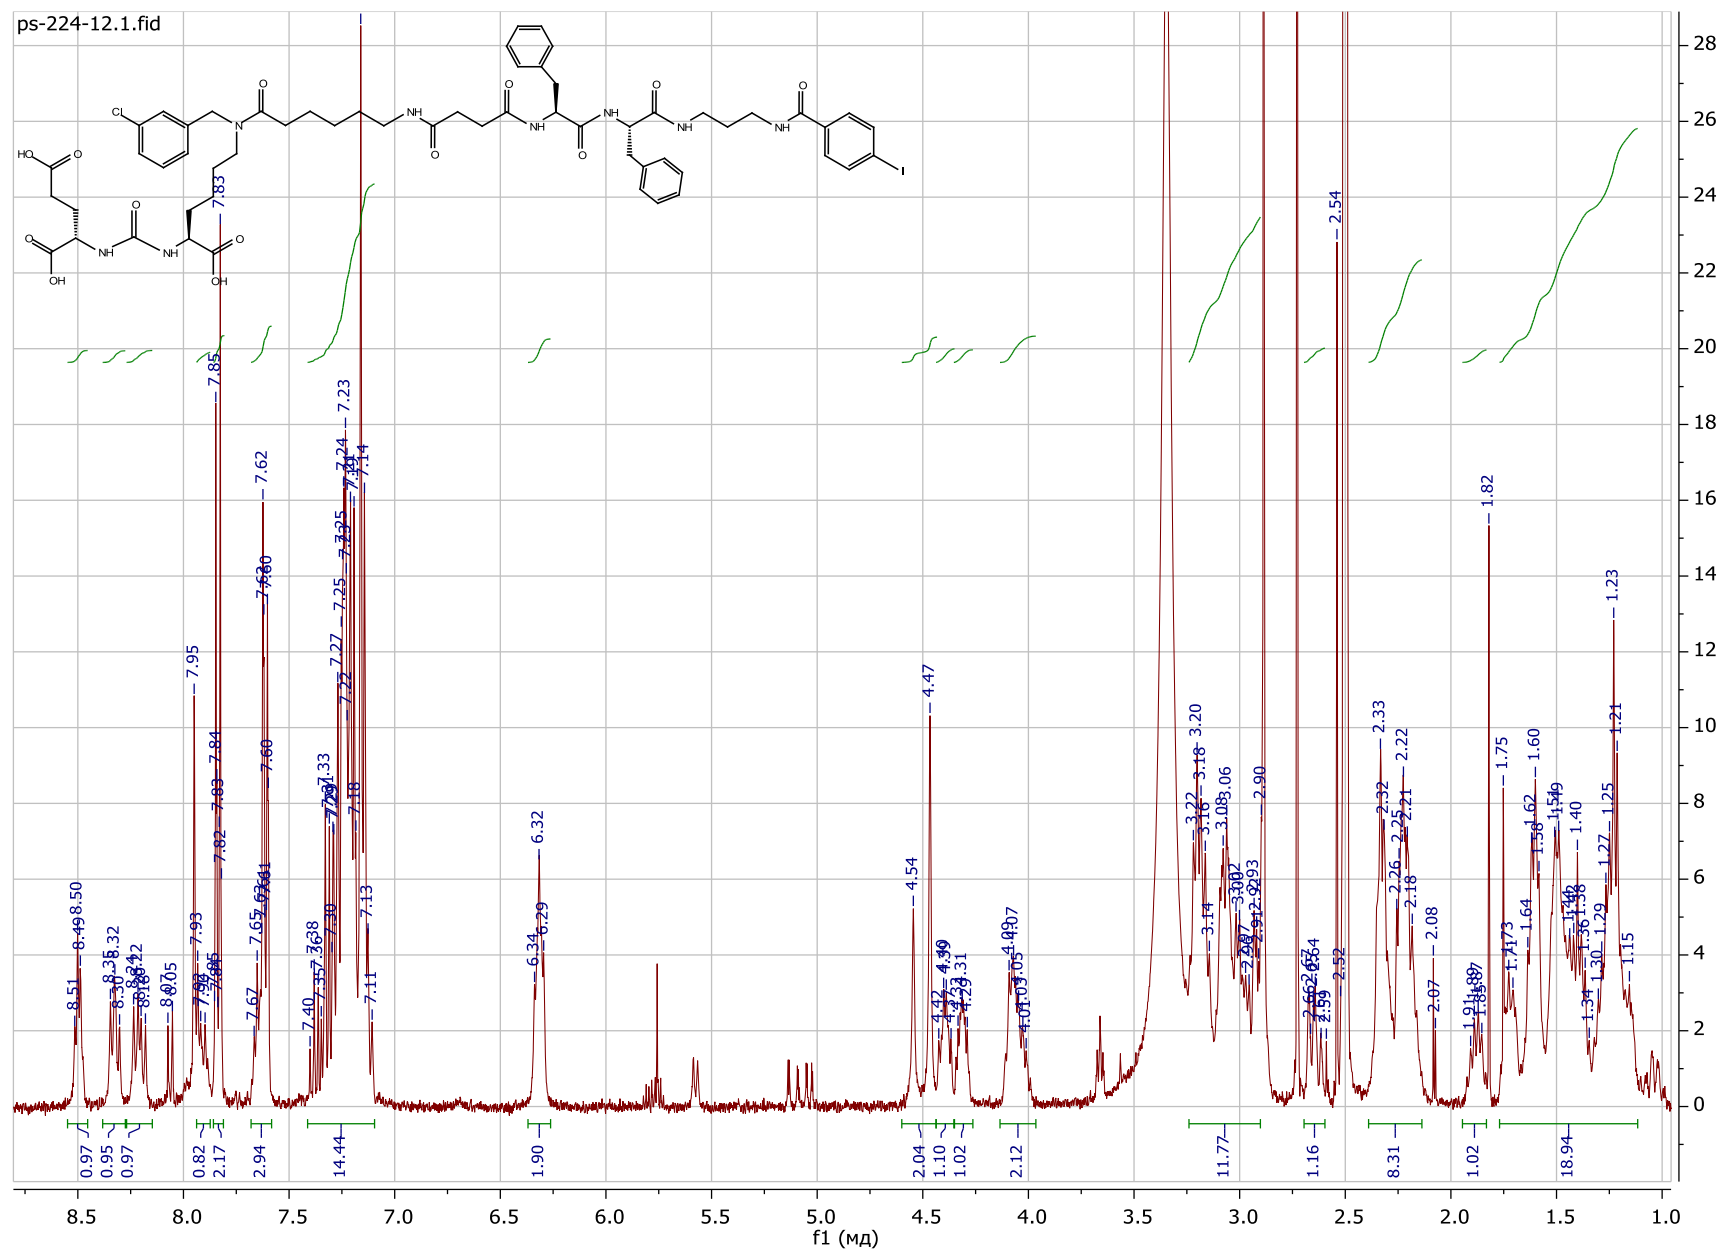

Figure S46.  $^1\text{H}$  NMR spectrum of compound **22** in  $\text{DMSO}-d_6$ .

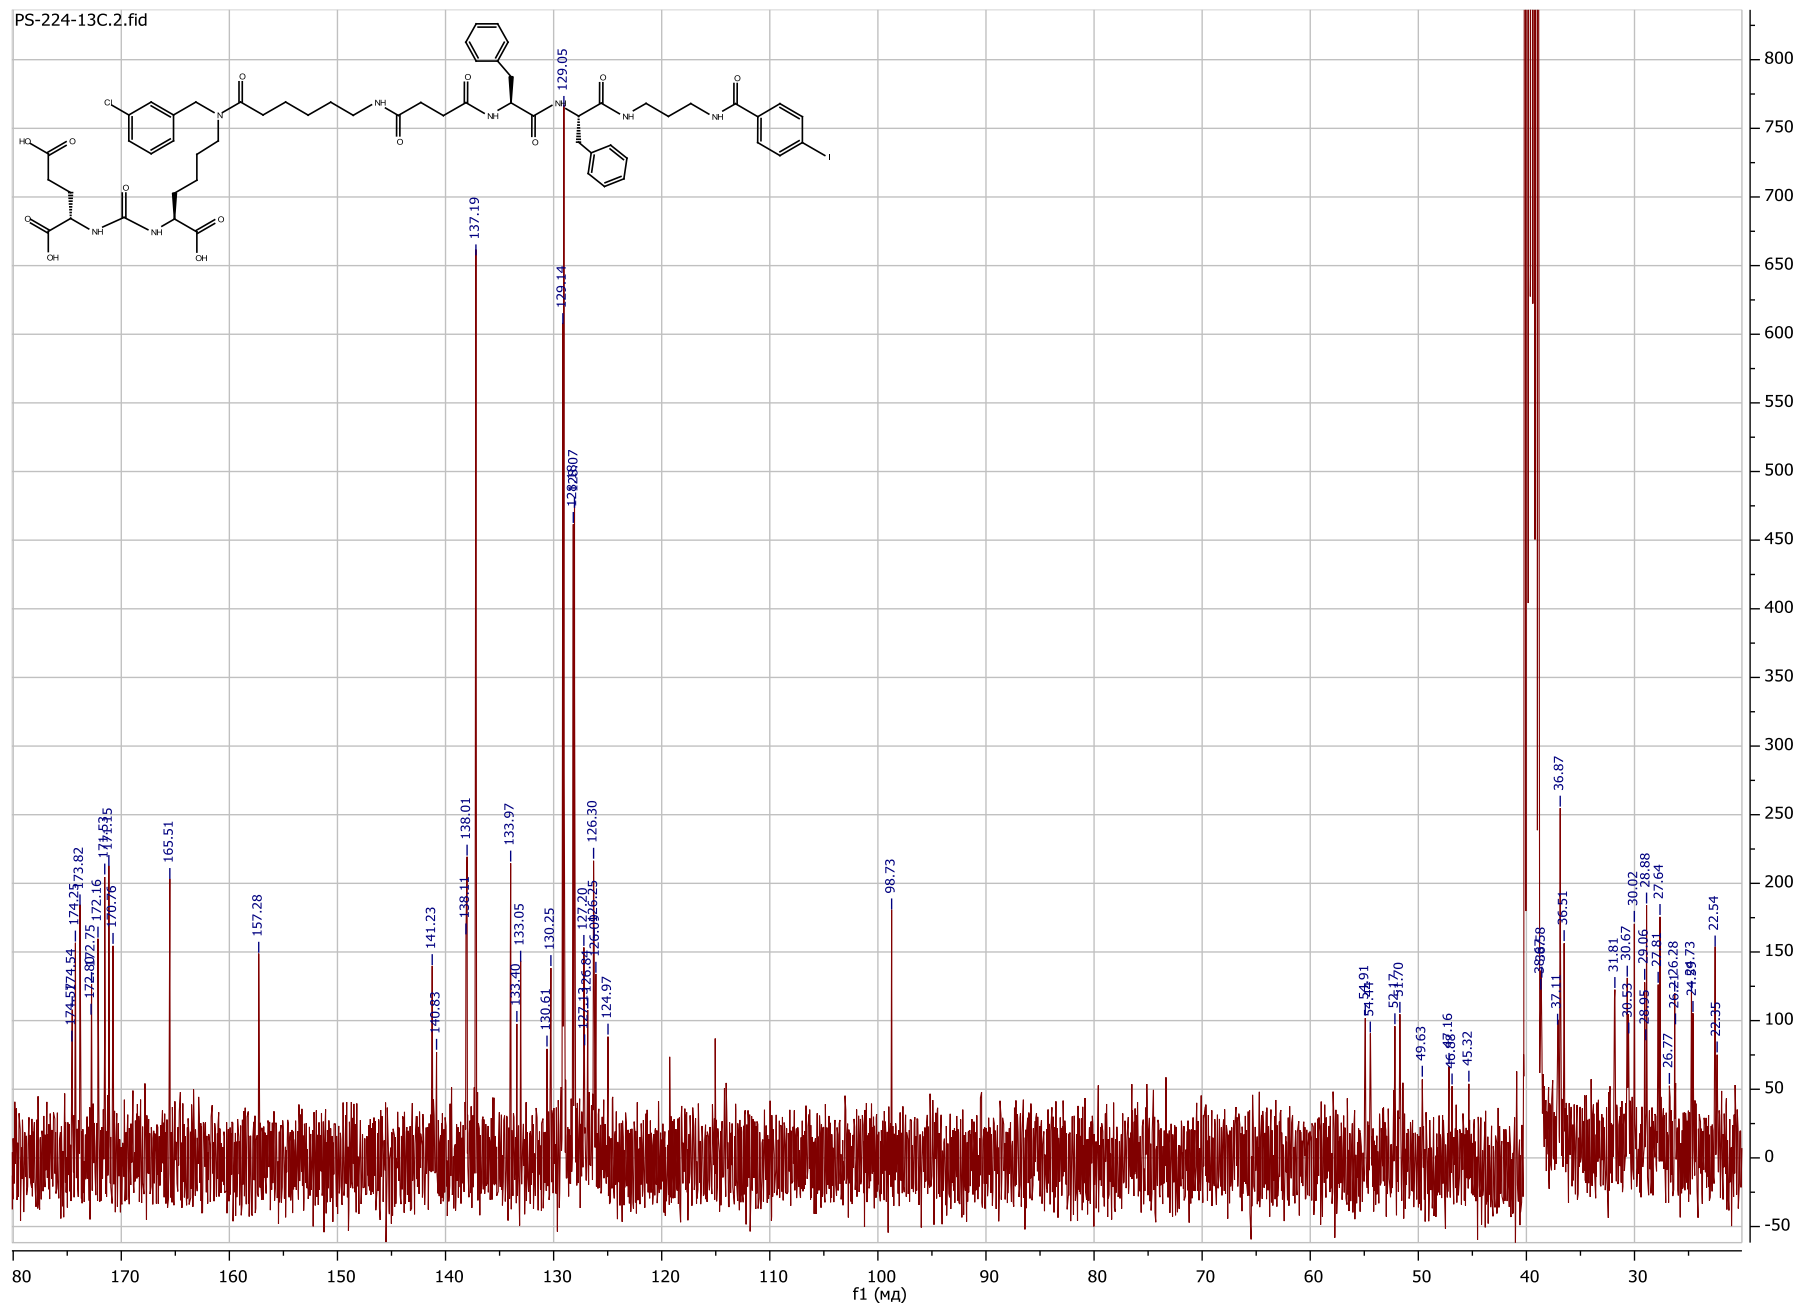

Figure S47. <sup>13</sup>C NMR spectrum of compound № 22 in DMSO-*d*<sub>6</sub>.

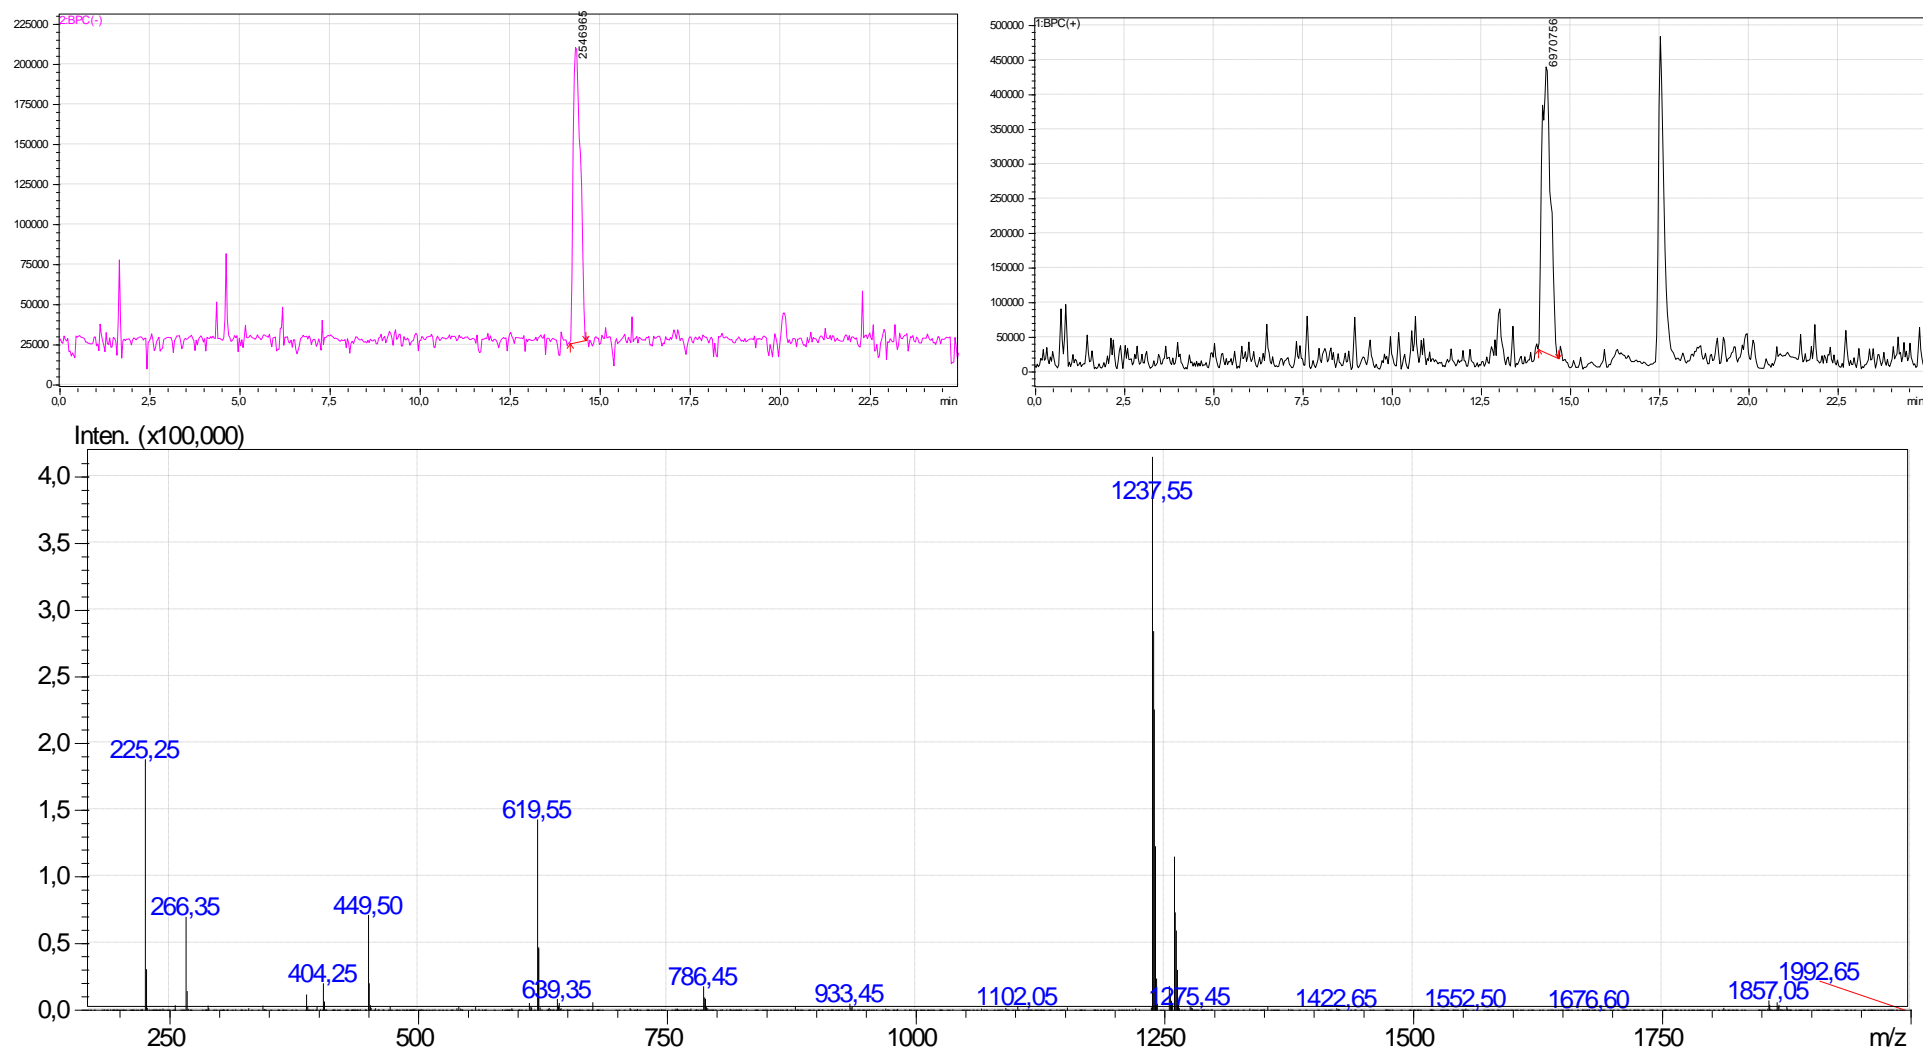

Figure S48. ESI-MS of compound № 22

NL:  
1.24E4  
PS\_224\_22042814194  
9#34-58 RT: 1.01-1.38  
AV: 25 T: FTMS + p ESI  
Full ms  
[150.00-2000.00]

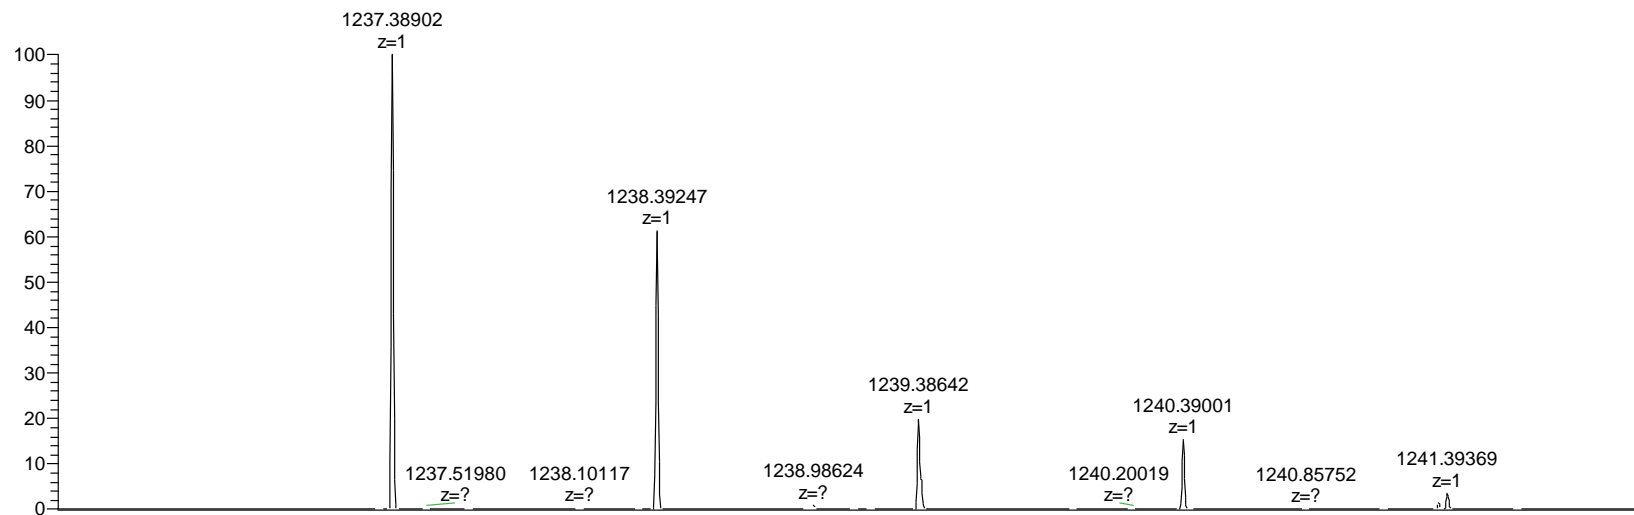

NL:  
3.83E5  
C<sub>57</sub>H<sub>70</sub>ClIN<sub>8</sub>O<sub>13</sub>+H:  
C<sub>57</sub>H<sub>71</sub>ClI<sub>1</sub>N<sub>8</sub>O<sub>13</sub>  
pa Chrg 1

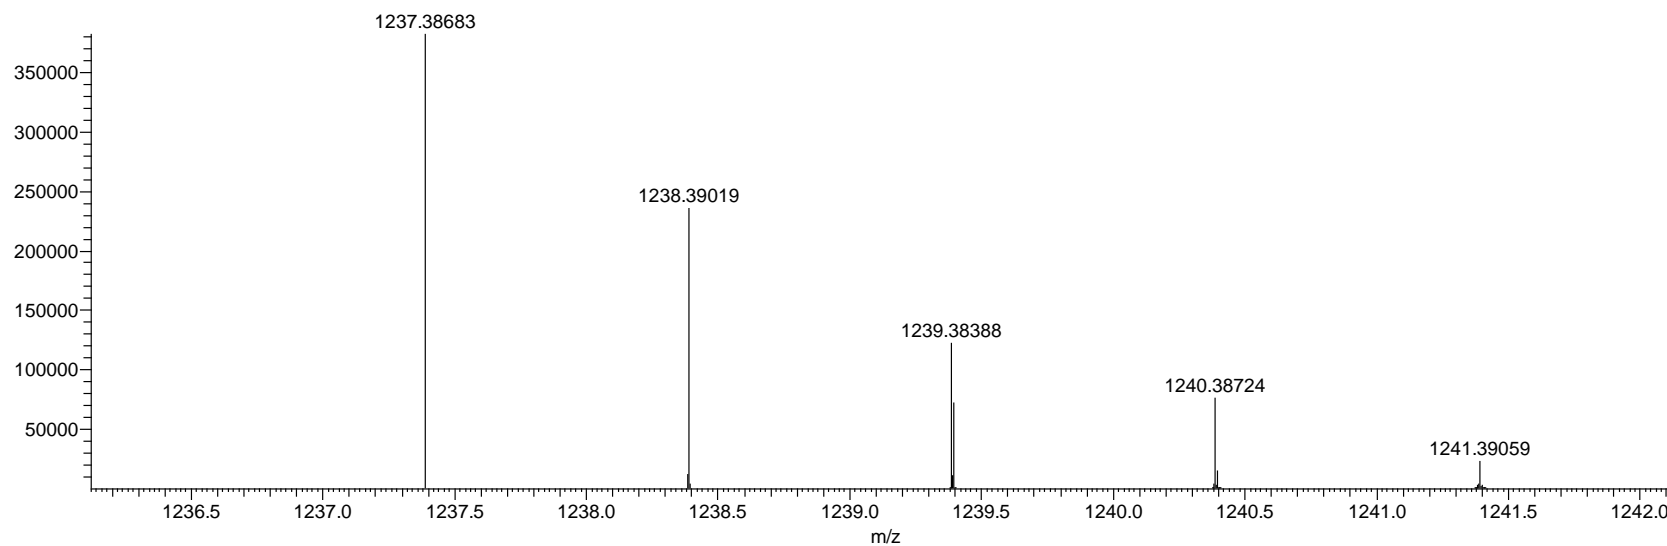

Figure S49. HRMS (m/z, ESI) of compound No 22
